# Supplementary material for: Aryl alkyl carbene–Pd complex assisted C–Cl bond activation: an unprecedented cross-coupling route to trans-stilbenes
Source: Royal Society of Chemistry journal article supplement (doi:10.1039/c5ra06107e), 2015-01-01
Supplement: c5ra06107e1.pdf [file c5ra06107e1.pdf]

## Supporting Information

# Aryl alkyl carbene-Pd complex assisted C-Cl bond activation: An unprecedented cross-coupling route to *trans*-stilbenes

Abadh Kishor Jha,<sup>a</sup> Shyam Kishor,<sup>b</sup> Dhananjay Kumar,<sup>a</sup> and Nidhi Jain\*<sup>a</sup>

<sup>a</sup>Department of Chemistry, Indian Institute of Technology, New Delhi-110016

<sup>b</sup>Department of Chemistry, J.V. College, Uttar Pradesh-250611

\*E-mail: [njain@chemistry.iitd.ac.in](mailto:njain@chemistry.iitd.ac.in); Fax: +91 11 26581102; Tel: +91 11 26591562

## Table of content

| SN  | Particulars                                                                               | Pages |
|-----|-------------------------------------------------------------------------------------------|-------|
| 1.  | Experimental procedures and NMR data of synthesized compounds ....                        | S1    |
| 2.  | Copies of <sup>1</sup> H NMR, <sup>13</sup> C NMR and Mass spectra (Spectrum 1-60).....   | S8    |
| 3.  | HPLC data (Figure S1) .....                                                               | S46   |
| 4.  | UV-visible spectrum of compound 3a (Figure S2).....                                       | S47   |
| 5.  | DLS data of reaction mixture (Figure S3).....                                             | S47   |
| 6.  | COSY45 spectrum of reaction mixture at 10 minutes (Figure S4).....                        | S48   |
| 7.  | DEPT90 spectrum of reaction mixture at 10 minutes (Figure S5-6).....                      | S49   |
| 8.  | Sequential LC-MS data of the reaction mixture at 1, 5, and 10 minutes (Figure S7-9) ..... | S50   |
| 9.  | EDAX of reaction mixture after 5 minutes (Figure S10).....                                | S52   |
| 10. | Single Crystal X-ray details (Figure S11; Table S1) .....                                 | S53   |
| 11. | Computational details (Figure S11-27; Table S2-18).....                                   | S55   |
| 12. | References.....                                                                           | S82   |

## 1. Experimental Section

All starting materials were commercially available and were used without further purification. 1-(bromoethyl)benzene was prepared by reaction of styrene with hydrobromic acid in acetic acid. 1-(hydroxyethyl)benzene was prepared by reduction of acetophenone with sodium borohydride in methanol. 1-(iodoethyl)benzene and 1-(chloroethyl)benzene were prepared by reaction of 1-(hydroxyethyl)benzene with molecular iodine and concentrated hydrochloric acid respectively. All reactions were done under Microwave irradiation using CEM Discover system microwave at a *MW* power of 50 watts. The products were purified by column chromatography on silica gel.  $^1\text{H}$  and  $^{13}\text{C}$  NMR spectra were measured on a Bruker DPX-300 MHz spectrometer ( $^1\text{H}$  300 MHz,  $^{13}\text{C}$  75 MHz), using  $\text{CDCl}_3$  as the solvent with tetramethylsilane (TMS) as the internal standard at room temperature. Chemical shifts are given in  $\delta$  relative to TMS, the coupling constants *J* are given in Hz.  $\delta$  given in ppm. UV spectra was obtained in hexane on Perkin Elmer (Lambda Bio 20) spectrophotometer. The ESI-MS was performed on MICROTOF II mass instrument. LCMS was performed on Waters 2767 sample manager with waters ZQ mass detector. Molecular mass (GC-MS) of compounds were measured on Perkin Elmer Clarus 600 C. The size of nanoparticles was determined by Malvern DLS. IR spectra were recorded on Nicolet 460 (Protege) spectrophotometer in range 4000-400  $\text{cm}^{-1}$ .

### General procedure for the synthesis of *trans*-stilbenoids (3a-l)

In a typical procedure, to **1a** (1.08 mmol) procured from Alfa aesar, 30% styrene (0.46 mmol) was added at the beginning of the reaction. The contents were taken in 5 mL microwave tube containing 1.0 mL DMF. To it, aryl chloride (4.64 mmol) and then KOH (4.64 mmol) dissolved in 1mL water was added. This was followed by addition of  $\text{Pd}(\text{OAc})_2$  (0.5 mol%) to the reaction mixture. The contents were irradiated in microwave for 50 min at 140 °C where after the reaction mixture was extracted with hexane (3 x 25 mL). The combined organic layers were washed with water, dried over  $\text{Na}_2\text{SO}_4$  and concentrated under reduced pressure. Chromatography on silica gel afforded pure product.

In an alternate procedure, product mixture of synthesized **1a** (containing 0.7 equiv. **1a** and 0.3 equiv. styrene) was taken in 1 mL DMF in a 5.0 mL microwave tube. To it, aryl chloride (3.0 equiv.) and KOH (3.0 equiv.) dissolved in 1.0 mL water were added. This was followed by addition of  $\text{Pd}(\text{OAc})_2$  (0.5 mol%) to the reaction mixture. The contents were irradiated in

microwave for 50 minutes at 140 °C where after the reaction mixture was extracted with hexane (3 x 25 mL). The combined organic layers were washed with water, dried over Na<sub>2</sub>SO<sub>4</sub> and concentrated under reduced pressure. Chromatography on silica gel afforded pure product.

**General procedure for the synthesis of *trans*-stilbenoids (3m, 3n, 3o):**

To 1-(bromoethyl)naphthalene (**1a'**) (1.49 mmol) prepared from 2-vinyl naphthalene, 30% styrene (0.64 mmol) was added at the beginning of the reaction. The contents were taken in 5 mL microwave tube containing 1 mL DMF. To it, aryl chloride (6.39 mmol) followed by KOH (6.39 mmol) dissolved in 1 mL water was added. This was followed by addition of Pd(OAc)<sub>2</sub> (0.5 mol%) to the reaction mixture. The contents were irradiated in microwave for 50 min at 140 °C where after the reaction mixture was extracted with hexane (3 x 25 mL). The combined organic layers were washed with water, dried over Na<sub>2</sub>SO<sub>4</sub> and concentrated under reduced pressure. Chromatography on silica gel afforded pure product.

**Experimental procedure for quenching reaction using TEMPO:**

To **1a** (1.08 mmol) procured from Alfa Aeser, 30% styrene (0.46 mmol) was added. The contents were taken in 5 mL microwave tube containing 1.0 mL DMF. To it, aryl chloride (4.64 mmol), TEMPO (1.54 mmol), and KOH (4.64 mmol) dissolved in 1mL water was added. This was followed by addition of Pd(OAc)<sub>2</sub> (0.5 mol%) to the reaction mixture. The contents were irradiated in microwave for 50 min at 140 °C where after the reaction mixture was extracted with hexane (2 x 5 mL). The contents were then concentrated under reduced pressure.

**General procedure for time dependent NMR studies:**

To **1a** (0.36mmol) procured from Alfa Aeser, 30% styrene (0.15 mmol) was added at the beginning of the reaction. The contents were taken in 5 mL microwave tube containing 1.0 mL DMF. To it, aryl chloride (1.54 mmol) followed by KOH (1.54 mmol) dissolved in 1.0 mL water was added. Pd(OAc)<sub>2</sub> (0.5 mol%) was added to the reaction mixture. The contents were stirred well for 1-2 minutes, extracted with 5.0 mL hexane, dried over Na<sub>2</sub>SO<sub>4</sub> and then concentrated under reduced pressure which resulted in loss of most of the styrene as it is highly volatile. <sup>1</sup>H NMR of this sample was taken in CDCl<sub>3</sub>. This was considered to be reaction at zero minutes. The same procedure was repeated eight more times after irradiating the reaction mixture in microwave at 140 °C for different reaction times: 1, 2, 5, 10, 20, 30,

40 and 50 minutes. After each reaction, work up was done as described above and  $^1\text{H}$  NMR of the sample was taken in  $\text{CDCl}_3$ .

**Experimental procedures for the synthesis of starting materials and characterization data of *trans*-stilbenoids:**

**1-(Bromoethyl)benzene (1a):** Styrene (43.2 mmol) was taken in 50 mL R.B. flask containing 1.0 mL acetic acid. 33% hydrobromic acid in acetic acid (43.2 mmol) was added drop-wise with continuous shaking at rt. The contents were then stirred at rt for 4 h. The progress of reaction was monitored through TLC. After completion of reaction, the reaction mixture was neutralized with aqueous sodium bicarbonate solution. Product was extracted with dichloromethane and concentrated under reduced pressure. % conversion was determined by HPLC (Fig. S4). Light brown liquid; yield = 5.56 g, 70%;  $^1\text{H}$  NMR (300 MHz,  $\text{CDCl}_3$ )<sup>1</sup>  $\delta$  (ppm) 7.38 (d,  $J = 7.2$  Hz, 2H), 7.20-7.30 (m, 3H), 5.15 (q,  $J = 6.6$  Hz, 1H), 1.97 (d,  $J = 6.6$  Hz, 3H);  $^{13}\text{C}$  NMR (75 MHz,  $\text{CDCl}_3$ )  $\delta$  (ppm) 143.0, 128.5, 128.2, 126.6, 49.4, 26.7. LRMS-ESI exact mass calcd. For  $\text{C}_8\text{H}_{10}\text{Na}^+ [\text{M}+\text{H}+\text{Na}]^+$  equires  $m/z$  129.0680, found  $m/z$  129.0550.

**2-(1-bromoethyl)naphthalene (1a'):** 2-Vinylnaphthalene (3.26 mmol) was taken in 50 mL round bottom flask containing 1 mL acetic acid. 33% hydrobromic acid in acetic acid (3.25 mmol) was added dropwise with proper shaking at room temperature. The contents were there after stirred at room temperature for 4 h. After completion of reaction, the reaction mixture was neutralized by aqueous sodium bicarbonate solution. The product was extracted with dichloromethane and concentrated under reduced pressure. Light brown liquid; yield = 748 mg, 98%;  $^1\text{H}$  NMR (300MHz,  $\text{CDCl}_3$ )<sup>2</sup>  $\delta$  (ppm) 7.83 (t,  $J = 6.6$  Hz, 4H), 7.58-7.61 (m, 1H), 7.47-7.50 (m, 2H), 5.40 (q,  $J = 6.9$  Hz, 1H), 2.14 (d,  $J = 6.9$  Hz, 3H);  $^{13}\text{C}$  NMR (75 MHz,  $\text{CDCl}_3$ )  $\delta$  (ppm) 140.5, 133.2, 133.1, 128.7, 128.2, 127.7, 126.5, 125.2, 125.1, 50.1, 26.8. EI-MS ( $m/z$ ): 155.

**1-(Iodoethyl)benzene (1c):** 1-(hydroxyethyl)benzene (4.1 mmol) was mixed properly with a crushed mixture of triphenylphosphene (4.1 mmol) and iodine (4.1 mmol). The entire contents were taken in microwave tube and irradiated in microwave for 5 minutes. Product was extracted in hexane-water mixture and concentrated under reduced pressure. Pure **1c** was obtained and was characterized by NMR and mass. Dark yellow orange liquid; yield = 913 mg, 96%;  $^1\text{H}$  NMR (300MHz,  $\text{CDCl}_3$ )<sup>3</sup>  $\delta$  (ppm) 7.39-7.55 (m, 5H), 5.51 (q,  $J = 6.3$  Hz, 1H),

2.31 (d,  $J = 6.3$  Hz, 3H);  $^{13}\text{C}$  NMR (75 MHz,  $\text{CDCl}_3$ )  $\delta$  (ppm) 145.5, 128.9, 128.1, 126.8, 29.2, 26.6. EI-MS ( $m/z$ ): 105.

**1-(Chloroethyl)benzene (1d):** 1-(hydroxyethyl)benzene (16.4 mmol) was shaken with 45 mL concentrated hydrochloric acid in separating funnel for 20 minutes. The aqueous layer was removed and an additional 25 mL of conc. HCl was added to the organic layer and again shaken for 20 minutes. The aqueous layer was removed and organic layer was washed four times with 25 mL water followed by a wash with 20 mL of 5%  $\text{NaHCO}_3$ . The organic layer was dried under reduced pressure. Pure **1d** was obtained and was characterized by NMR and mass. Light yellow liquid; yield = 2.25 g, 98%;  $^1\text{H}$  NMR (300MHz,  $\text{CDCl}_3$ )<sup>4</sup>  $\delta$  (ppm) 7.20-7.36 (m, 5H), 5.00 (q,  $J = 6.6$  Hz, 1H), 1.76 (d,  $J = 6.9$  Hz, 3H);  $^{13}\text{C}$  NMR (75 MHz,  $\text{CDCl}_3$ )  $\delta$  (ppm) 143.0, 128.8, 128.4, 126.7, 58.9, 26.7. EI-MS ( $m/z$ ): 105.

**1-(Hydroxyethyl)benzene (1e):** Acetophenone (66.67 mmol) was taken in 100 mL round bottle flask containing 40 mL methanol.  $\text{NaBH}_4$  (131.58 mmol) was added in portions. Reaction mixture was stirred at room temperature for 1 h and quenched with water. The mixture was extracted with DCM, dried over  $\text{MgSO}_4$ , and solvent was evaporated to afford the product as colourless oil. Further purification by column chromatography on silica gel afforded pure **1e**. Colorless liquid; yield = 6.84 g, 84%;  $^1\text{H}$  NMR (300MHz,  $\text{CDCl}_3$ )<sup>5</sup>  $\delta$  (ppm) 7.34-7.38 (m, 4H), 7.27-7.30 (m, 1H), 4.91 (q,  $J = 6.3$  Hz, 1H), 1.51 (d,  $J = 6.3$  Hz, 3H);  $^{13}\text{C}$  NMR (75 MHz,  $\text{CDCl}_3$ )  $\delta$  (ppm) 146.2, 128.5, 127.3, 125.7, 70.1, 25.3. EI-MS ( $m/z$ ): 122.

**(E)-1,2-Diphenylethylene (3a):** White crystalline solid; yield = 167 mg, 86%;  $^1\text{H}$  NMR (300MHz,  $\text{CDCl}_3$ )  $\delta$  (ppm)<sup>6</sup> 7.59 (d,  $J = 7.5$  Hz 2H), 7.43 (t,  $J = 7.5$  Hz, 2H), 7.28-7.36 (m, 1H), 7.18 (s, 1H);  $^{13}\text{C}$  NMR (100 MHz,  $\text{CDCl}_3$ )  $\delta$  (ppm) 137.5, 128.9, 128.8, 127.8, 126.7. EI-MS ( $m/z$ ): 179.

**(E)-1-Chloro-4-styrylbenzene (3b):** White solid; yield = 194 mg, 84%;  $^1\text{H}$  NMR (300MHz,  $\text{CDCl}_3$ )<sup>7</sup>  $\delta$  (ppm) 7.42 (d,  $J = 7.2$  Hz 2H), 7.36 (d,  $J = 8.4$  Hz, 2H), 7.17-7.30 (m, 5H), 6.93 (s, 1H).  $^{13}\text{C}$  NMR (75 MHz,  $\text{CDCl}_3$ ,  $\delta$  (ppm) 136.9, 135.8, 133.2, 129.3, 128.8, 128.7, 127.9, 127.6, 127.4, 126.5.

**(E)-1-Nitro-4-styrylbenzene (3c):** Yellowish solid; yield = 219 mg, 90%;  $^1\text{H}$  NMR (300MHz,  $\text{CDCl}_3$ )  $\delta$  (ppm) 8.24 (d,  $J = 9$  Hz, 2H), 7.65 (d,  $J = 9$  Hz, 2H), 7.57 (d,  $J = 7.5$ Hz, 2H), 7.28-7.45 (m, 4H), 7.11 (d,  $J = 13.5$  Hz, 1H).  $^{13}\text{C}$  NMR (75 MHz,  $\text{CDCl}_3$ ,  $\delta$  (ppm) 146.7, 143.8, 136.1, 133.2, 128.8, 128.8, 126.9, 126.8, 126.2, 124.09. HRMS-ESI exact mass

calcd. For  $C_{14}H_{11}NO_2Na^+$   $[M+Na]^+$  requires  $m/z$  248.0682, found  $m/z$  248.0685.

**(E)-1-Cyano-4-styrylbenzene (3d):** White solid; yield = 188 mg, 85%;  $^1H$  NMR (300MHz,  $CDCl_3$ )  $\delta$  (ppm) 7.55-7.67 (m, 6H), 7.32-7.44 (m, 3H), 7.24 (d,  $J = 16.2$  Hz, 1H), 7.10 (d,  $J = 16.5$ Hz, 1H);  $^{13}C$  NMR (75 MHz,  $CDCl_3$ ,  $\delta$  (ppm) 141.8, 136.2, 132.4, 132.3, 128.8, 128.6, 126.9, 126.8, 126.7, 118.9, 110.5, HRMS-ESI exact mass calcd. For  $C_{15}H_{12}N^+$   $[M]^+$  requires  $m/z$  206.0964, found  $m/z$  206.0958.

**(E)-1-Styryl-4-trifluoromethylbenzene (3e):** White solid; yield = 220 mg, 82%;  $^1H$  NMR (300MHz,  $CDCl_3$ )<sup>8</sup>  $\delta$  (ppm) 7.51 (d,  $J = 16.8$  Hz, 3H), 7.34 (t,  $J = 6.9$  Hz, 3H), 7.16-7.29 (m, 3H), 7.09 (d,  $J = 9.9$  Hz, 2H);  $^{13}C$  NMR (75 MHz,  $CDCl_3$ ,  $\delta$  (ppm) 140.8, 136.7, 131.2, 129.5, 128.8, 128.3, 127.2, 126.8, 126.6, 125.7. LRMS-ESI exact mass calcd. For  $C_{15}H_{12}F_3K^+$   $[M+H+K]^+$  requires  $m/z$  288.35, found  $m/z$  288.25.

**(E)-(4-Styrylphenyl)ethanone (3f):** White solid; yield = 192 mg, 80%;  $^1H$  NMR (300MHz,  $CDCl_3$ )<sup>6</sup>  $\delta$  (ppm) 7.97 (d,  $J = 7.8$  Hz, 2H) 7.54-7.62 (m, 4H), 7.40 (t,  $J = 6.9$  Hz, 2H), 7.33 (d,  $J = 6.9$  Hz, 1H), 7.25 (d,  $J = 16.2$  Hz, 1H), 7.14 (d,  $J = 16.2$  Hz, 1H), 2.62 (s, 3H).  $^{13}C$  NMR (75 MHz,  $CDCl_3$ ,  $\delta$  (ppm) 197.5, 142.0, 136.7, 135.9, 131.5, 128.9, 128.8, 128.3, 127.5, 126.8, 126.5, 26.6. LRMS-ESI exact mass calcd. For  $C_{16}H_{15}O^+$   $[M+H]^+$  requires  $m/z$  223.11, found  $m/z$  223.12.

**(E)-1-Methyl-4-styrylbenzene (3g):** White solid; yield = 155 mg, 74%;  $^1H$  NMR (300MHz,  $CDCl_3$ )  $\delta$  (ppm) 7.60 (d,  $J = 7.2$  Hz, 2H), 7.43 – 7.53 (m, 4H), 7.32-7.37 (m, 1H), 7.26 (d,  $J = 7.5$  Hz, 2H), 7.18 (s, 2H), 2.46 (s, 3H,  $CH_3$ );  $^{13}C$  NMR (75 MHz,  $CDCl_3$ ,  $\delta$  (ppm) 137.6, 137.5, 134.6, 129.5, 128.7, 127.8, 127.4, 126.5, 126.4, 21.3. EI-MS ( $m/z$ ): 194.

**(E)-1-Methyl-2-styrylbenzene (3h):** White solid; yield = 147 mg, 70%;  $^1H$  NMR (300MHz,  $CDCl_3$ )  $\delta$  (ppm)<sup>9</sup> 7.47 (d,  $J = 5.1$  Hz, 2H), 7.39 (d,  $J = 5.7$  Hz, 2H), 7.19-7.24 (m, 2H), 7.06-7.16 (m, 4H), 6.88 (d,  $J = 1.2$  Hz, 1H), 2.30 (s, 3H);  $^{13}C$  NMR (75 MHz,  $CDCl_3$ ,  $\delta$  (ppm) 137.8, 136.5, 135.9, 130.6, 130.1, 128.8, 128.6, 128.5, 127.74, 127.71, 126.7, 126.6, 126.4, 125.5, 20.1. EI-MS ( $m/z$ ): 194.

**(E)-1-Methoxy-4-styrylbenzene (3i):** White solid; yield = 45 mg, 20%;  $^1H$  NMR (300MHz,  $CDCl_3$ )  $\delta$  (ppm) 7.22 – 7.55 (m, 4H), 6.93 – 7.15 (m, 7H), 3.98 (s, 3H);  $^{13}C$  NMR (75 MHz,  $CDCl_3$ ,  $\delta$  (ppm) 159.0, 137.4, 129.8, 128.3, 127.9, 127.4, 126.9, 126.3, 125.9, 113.8, 54.9. HRMS-ESI exact mass calcd. For  $C_{15}H_{15}O^+$   $[M+H]^+$  requires  $m/z$  211.1115, found  $m/z$  211.1117.

**(E)-2-Styrylpyridine (3j):** White crystalline solid; yield = 145 mg, 74%; <sup>1</sup>H NMR (300MHz, CDCl<sub>3</sub>) δ (ppm) 8.54 (d, *J* = 4.5 Hz, 1H), 7.59 (t, *J* = 6.9 Hz, 1H), 7.52 (d, *J* = 9.3 Hz, 3H), 7.31 (t, *J* = 7.5 Hz, 3H), 7.24 (d, *J* = 6.9 Hz, 1H), 7.13-7.19 (m, 1H), 7.08 (t, *J* = 5.1 Hz, 1H). <sup>13</sup>C NMR (75 MHz, CDCl<sub>3</sub>, δ (ppm) 155.6, 149.7, 136.6, 136.5, 132.7, 128.7, 128.3, 127.9, 127.1, 122.09, 122.06. HRMS-ESI exact mass calcd. For C<sub>13</sub>H<sub>12</sub>N<sup>+</sup> [M]<sup>+</sup> requires *m/z* 180.0964, found *m/z* 180.0973.

**(E)-2-Styrylthiophene (3k):** White crystalline solid; yield = 141 mg, 70%; <sup>1</sup>H NMR (300MHz, CDCl<sub>3</sub>) δ (ppm) 7.47 (d, *J* = 7.5 Hz, 2H), 7.35 (t, *J* = 7.8 Hz, 2H), 7.19 (d, *J* = 6.6 Hz, 3H), 7.07 (d, *J* = 3 Hz, 1H), 7.00 (t, *J* = 3.6 Hz, 1H), 6.93 (d, *J* = 16.2 Hz, 1H); <sup>13</sup>C NMR (75 MHz, CDCl<sub>3</sub>, δ (ppm) 142.9, 137.0, 128.8, 128.4, 127.6, 126.4, 126.1, 124.4, 121.8. HRMS-ESI exact mass calcd. For C<sub>12</sub>H<sub>10</sub>SNa<sup>+</sup> [M+Na]<sup>+</sup> requires *m/z* 209.0401, found *m/z* 209.1065.

**(E)-1-Styrylnaphthalene (3l):** White crystalline solid; yield = 274 mg, 80%; <sup>1</sup>H NMR (300MHz, CDCl<sub>3</sub>)<sup>7</sup> δ (ppm) 8.25 (d, *J* = 7.5 Hz, 1H), 7.89-7.95 (m, 2H), 7.77-7.85 (m, 2H), 7.64 (d, *J* = 7.5 Hz, 2H), 7.49-7.59 (m, 3H), 7.44 (t, *J* = 7.5 Hz, 2H), 7.34 (d, *J* = 7.2 Hz, 1H), 7.18 (d, *J* = 16.2 Hz, 1H); <sup>13</sup>C NMR (75 MHz, CDCl<sub>3</sub>), δ (ppm) 137.6, 135.0, 133.7, 131.8, 131.4, 128.8, 128.6, 128.4, 128.0, 127.8, 126.7, 126.1, 125.8, 125.7, 123.8, 123.6. EI-MS (*m/z*): 230.

**(E)-2-Styrylnaphthalene (3m):** White crystalline solid; yield = 288 mg, 84%; <sup>1</sup>H NMR (300MHz, DMSO)<sup>10</sup> δ (ppm) 8.41 (d, *J* = 7.2 Hz, 1H), 8.08 (d, *J* = 16.2 Hz, 1H), 7.88-7.97 (m, 3H), 7.78 (d, *J* = 7.5 Hz, 2H), 7.53-7.62 (m, 3H), 7.42 (t, *J* = 7.2 Hz, 2H), 7.27-7.34 (m, 2H); <sup>13</sup>C NMR (75 MHz, DMSO), δ (ppm) 137.0, 134.6, 133.3, 132.6, 128.9, 128.7, 128.4, 128.2, 127.8, 127.7, 127.6, 126.5, 126.4, 126.3, 125.9, 123.6. EI-MS (*m/z*): 230.

**(E)-1-(1-Naphthyl)-2-(2-naphthyl)ethylene (3n):** White crystalline solid; yield = 260 mg, 74%; <sup>1</sup>H NMR (300MHz, DMSO) δ (ppm) 7.80-7.89 (m, 5H), 7.65-7.79 (m, 3H), 7.59 (d, *J* = 8.7 Hz, 1H), 7.41-7.52 (m, 4H), 7.25-7.38 (m, 2H), 7.04-7.2 (m, 1H); <sup>13</sup>C NMR (75 MHz, DMSO), δ (ppm) 123.6, 123.8, 124.1, 124.8, 125.4, 125.5, 125.7, 125.9, 126.2, 127.1, 127.4, 127.5, 127.7, 127.94, 127.99, 128.4, 131.8, 132.3, 133.2, 134.6, 135.8, 142.9. EI-MS (*m/z*): 281.

**(E)-2-(2-Naphthalen-2-yl-vinyl)thiophene (3o):** White crystalline solid; yield = 317 mg, 76%; <sup>1</sup>H NMR (300MHz, CDCl<sub>3</sub>) δ (ppm) 7.13-7.23 (m, 1H), 7.27-7.41 (m, 2H), 7.43-7.45

(m, 3H), 7.57-7.73 (m, 2H), 7.75-7.82 (m, 5H);  $^{13}\text{C}$  NMR (75 MHz,  $\text{CDCl}_3$ ,  $\delta$  (ppm) 123.6, 125.3, 125.4, 125.6, 125.8, 125.9, 126.2, 126.4, 127.5, 127.6, 127.7, 127.8, 128.1, 128.9, 133.7, 135.6. EI-MS ( $m/z$ ): 236.



## 2. Copies of $^1\text{H}$ NMR, $^{13}\text{C}$ NMR and Mass Spectra:

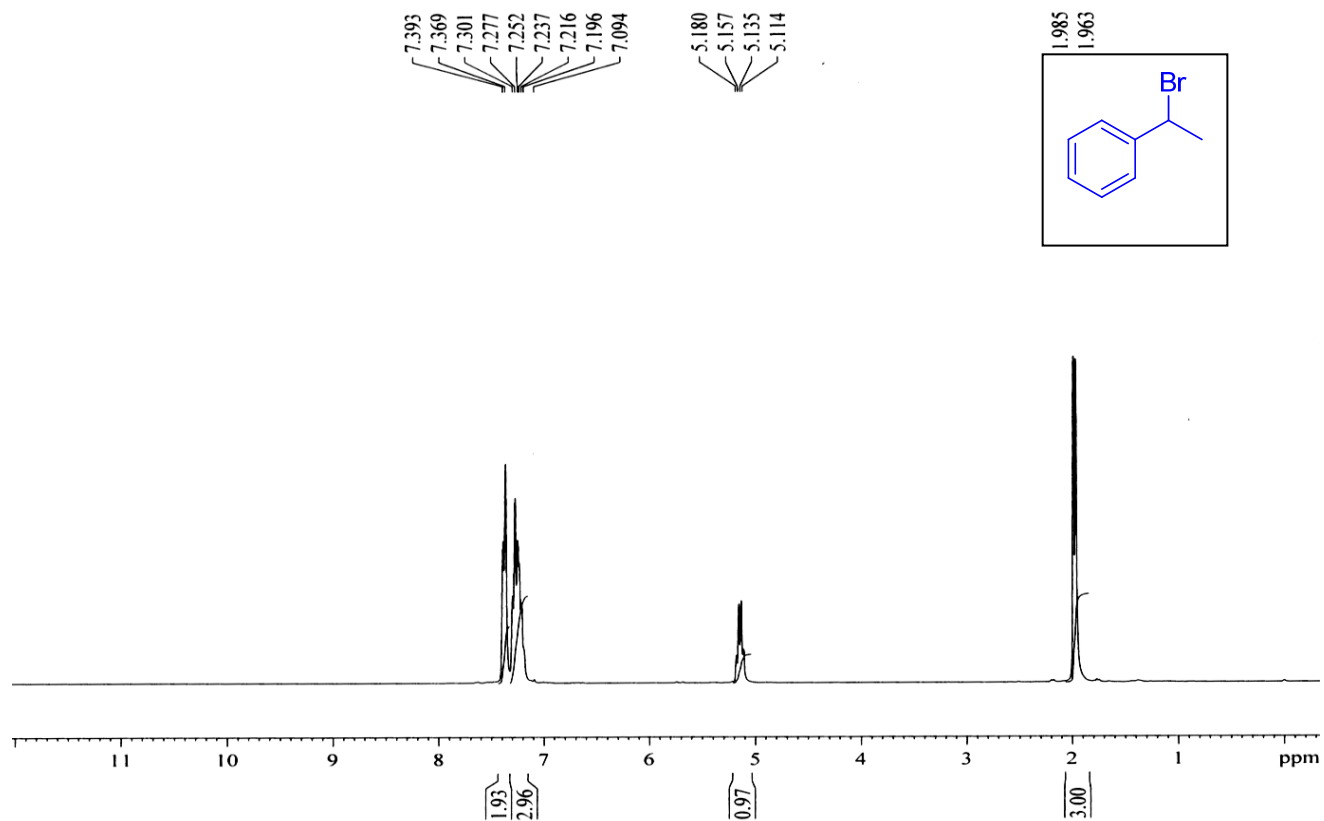

Spectrum 1. 300 MHz  $^1\text{H}$  NMR of compound 1a

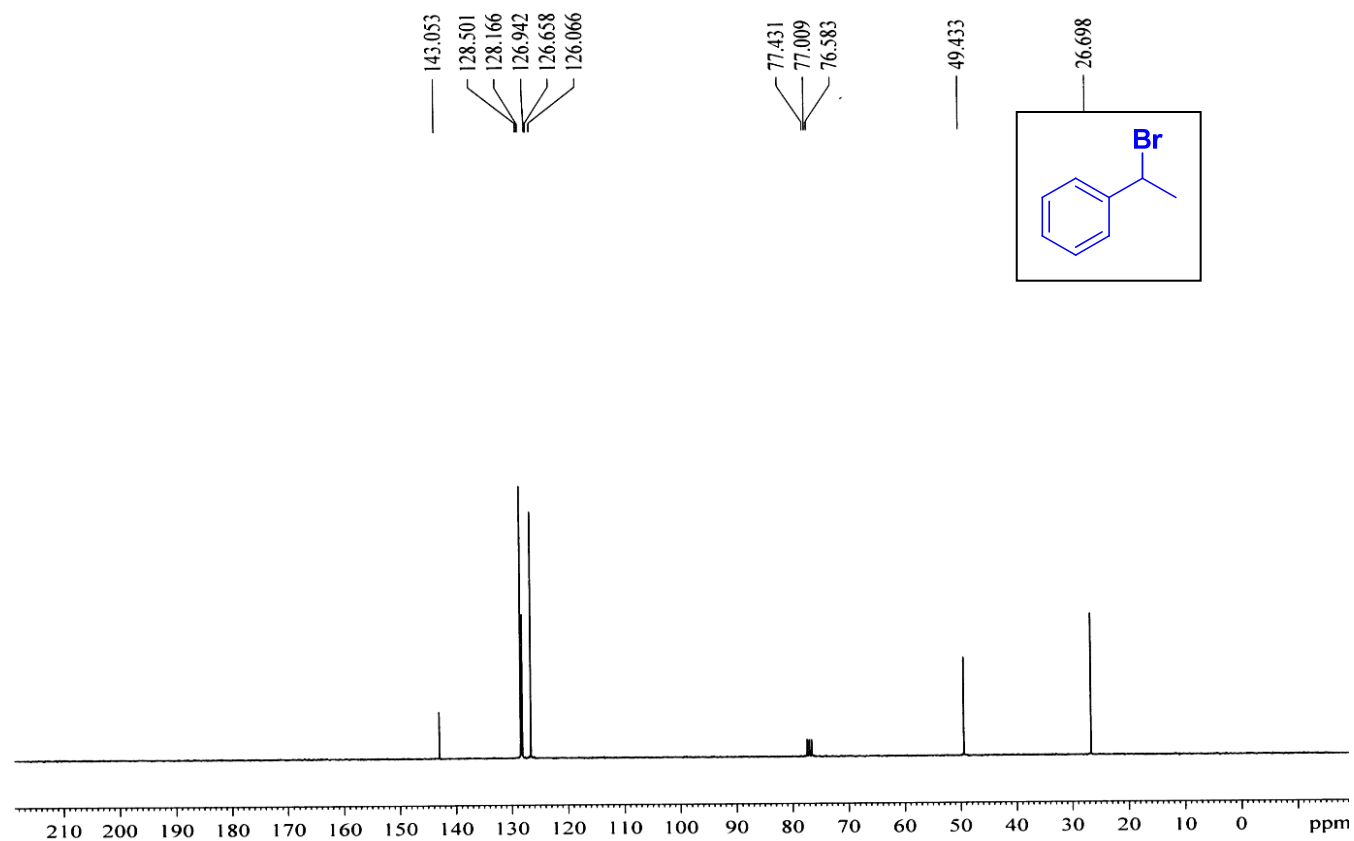

Spectrum 2. 75 MHz  $^{13}\text{C}$  NMR of compound 1a

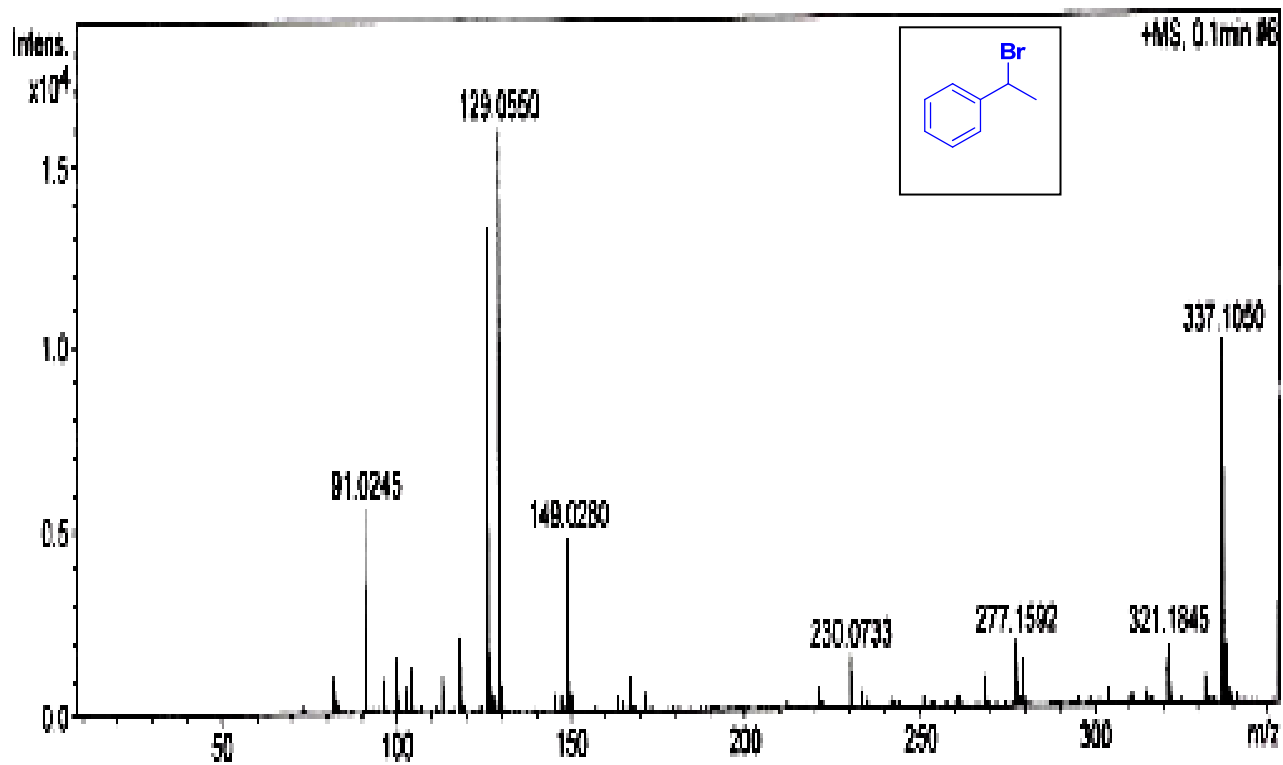

Spectrum 3. LRMS-ESI of compound 1a

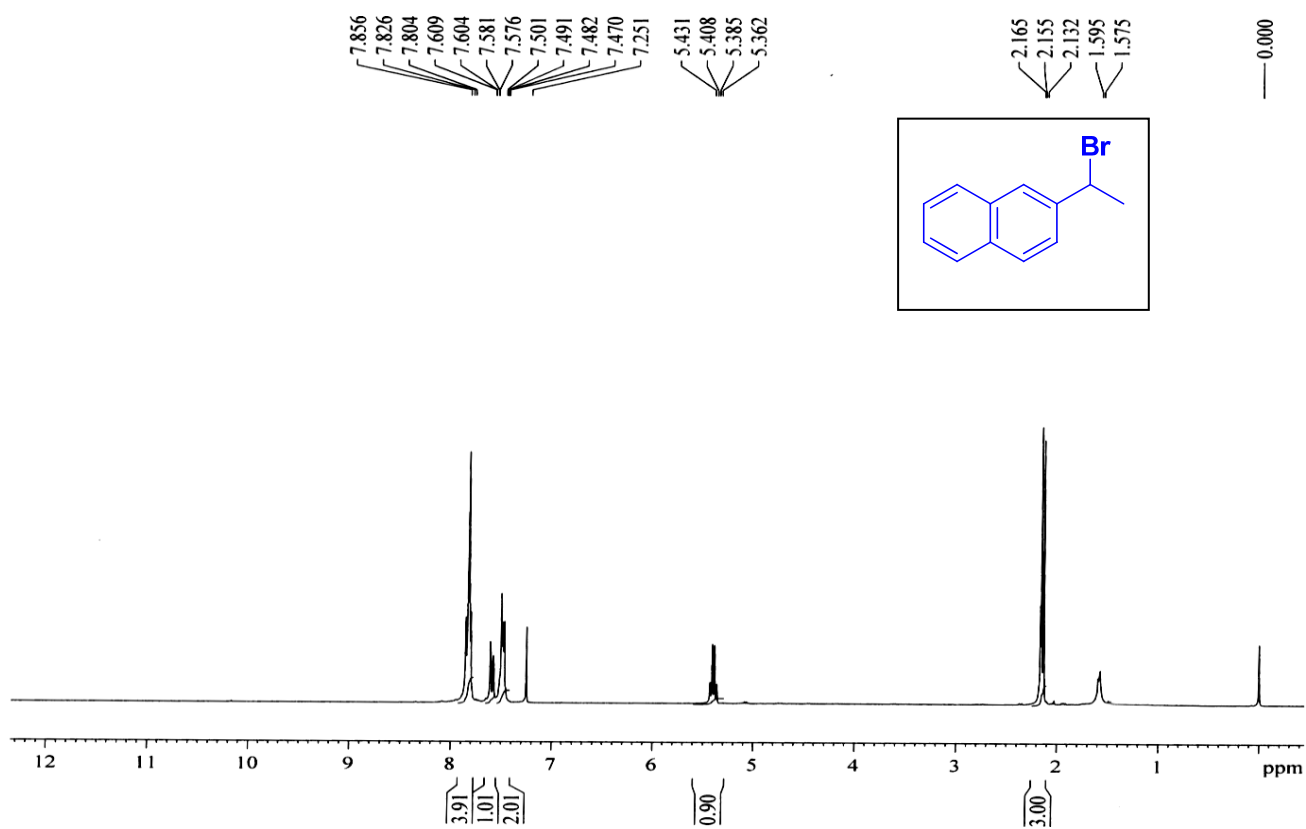

Spectrum 4. 300 MHz  $^1\text{H}$  NMR of compound 1a'

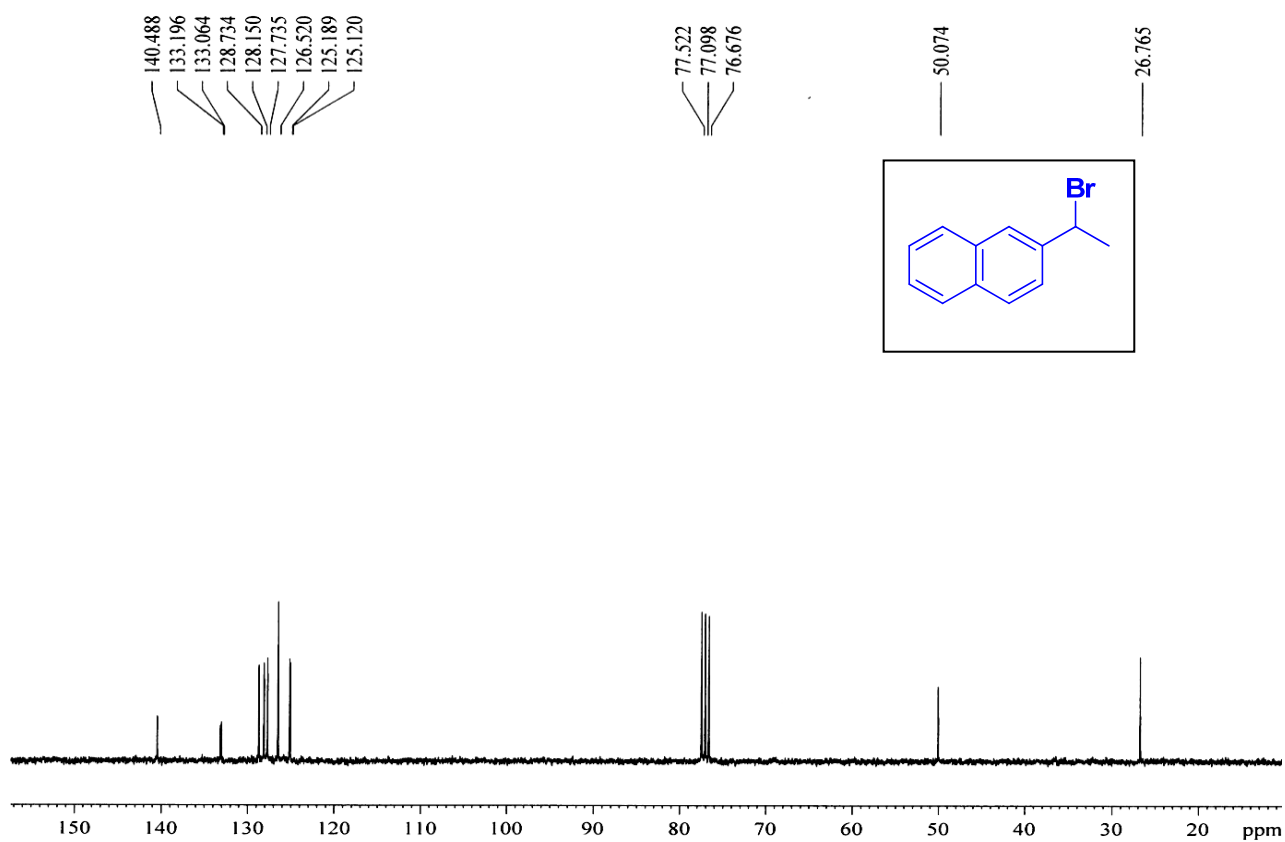

Spectrum 5. 75 MHz  $^{13}\text{C}$  NMR of compound 1a'

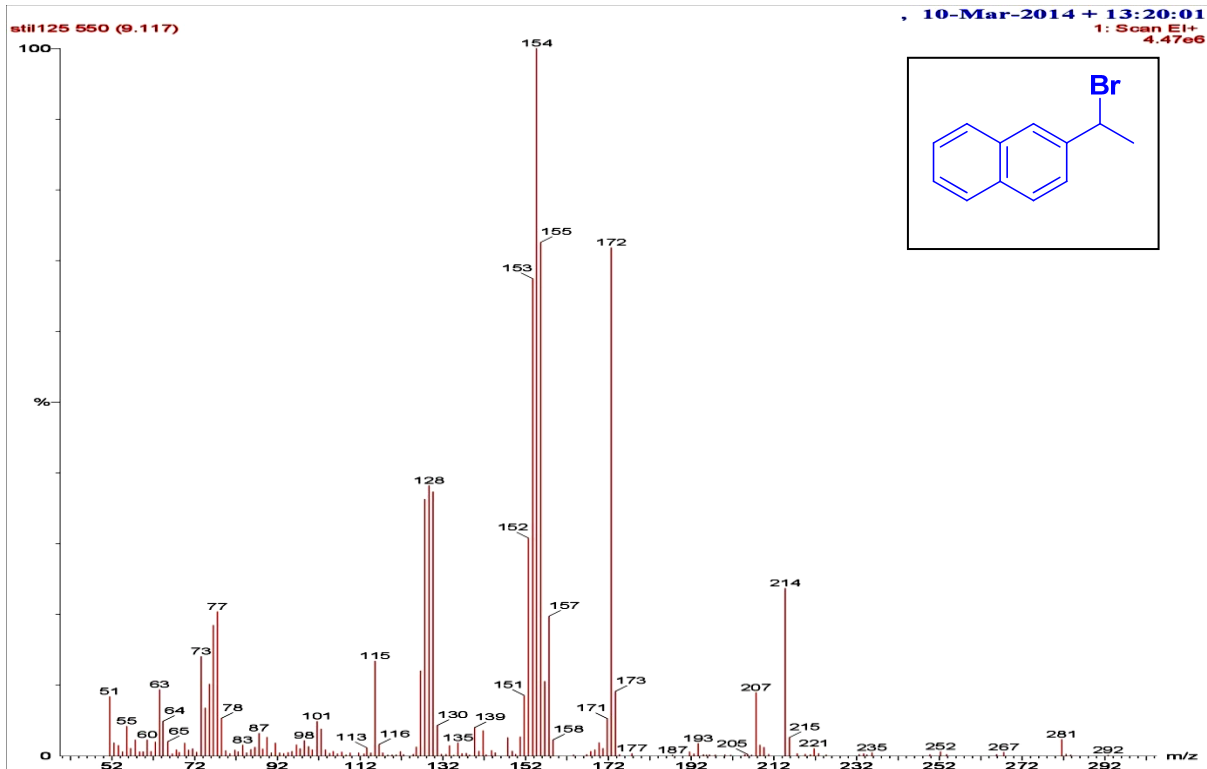

Spectrum 6. EI-MS of compound 1a'

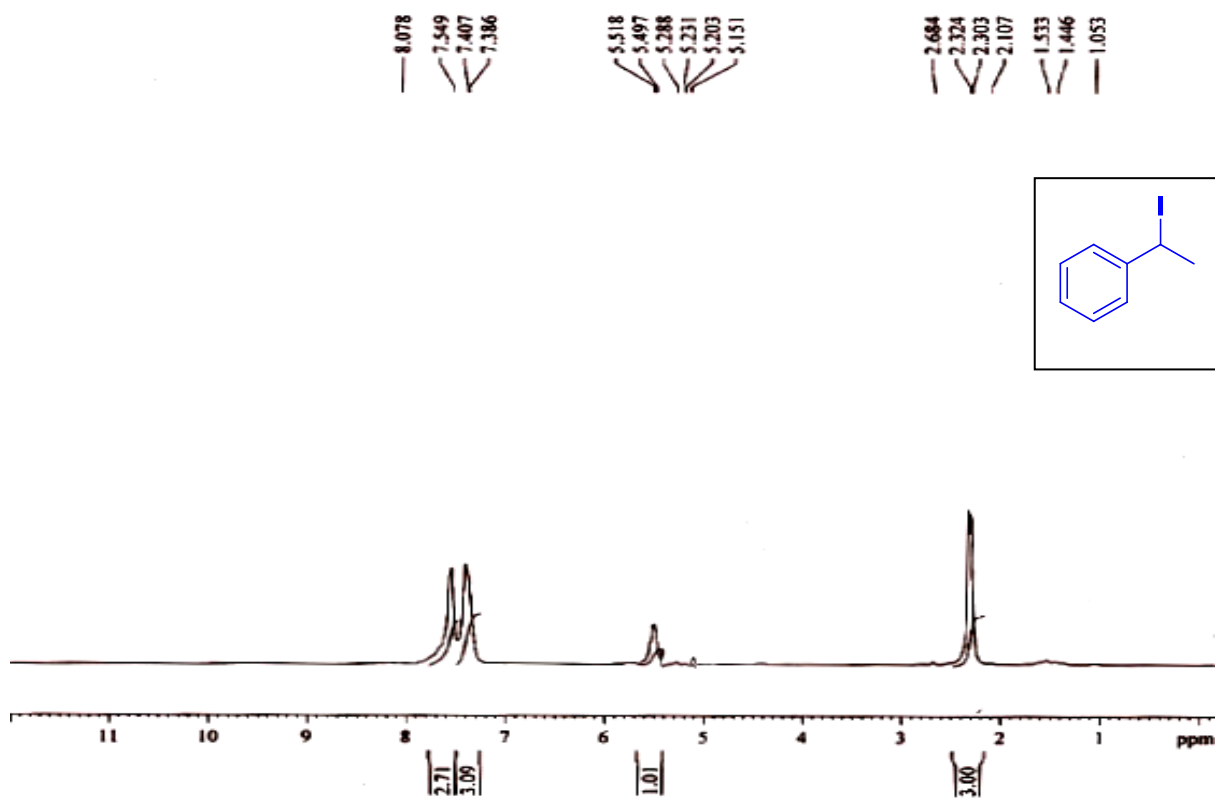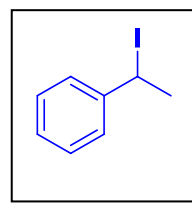

Spectrum 7. 300 MHz  $^1\text{H}$  NMR of compound 1b

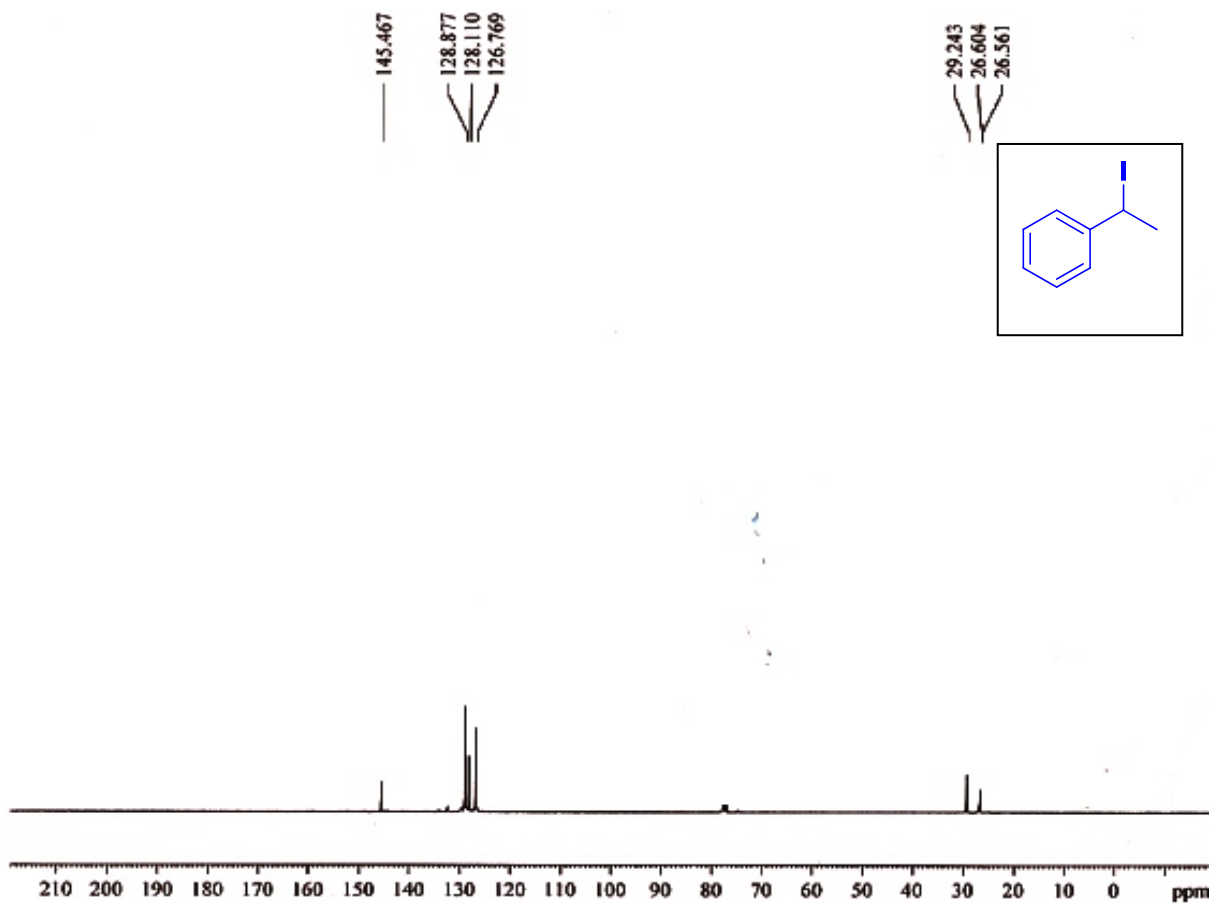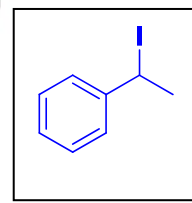

Spectrum 8. 75 MHz  $^{13}\text{C}$  NMR of compound 1b

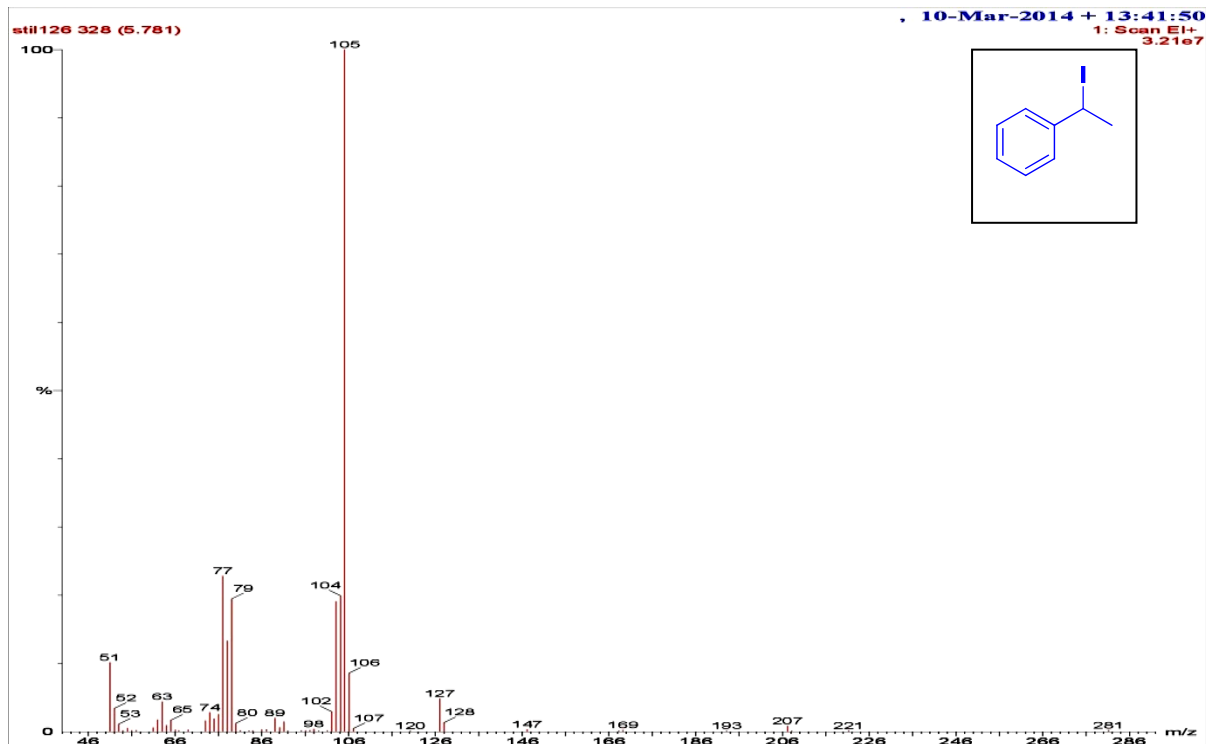

Spectrum 9. EI-MS of compound 1b

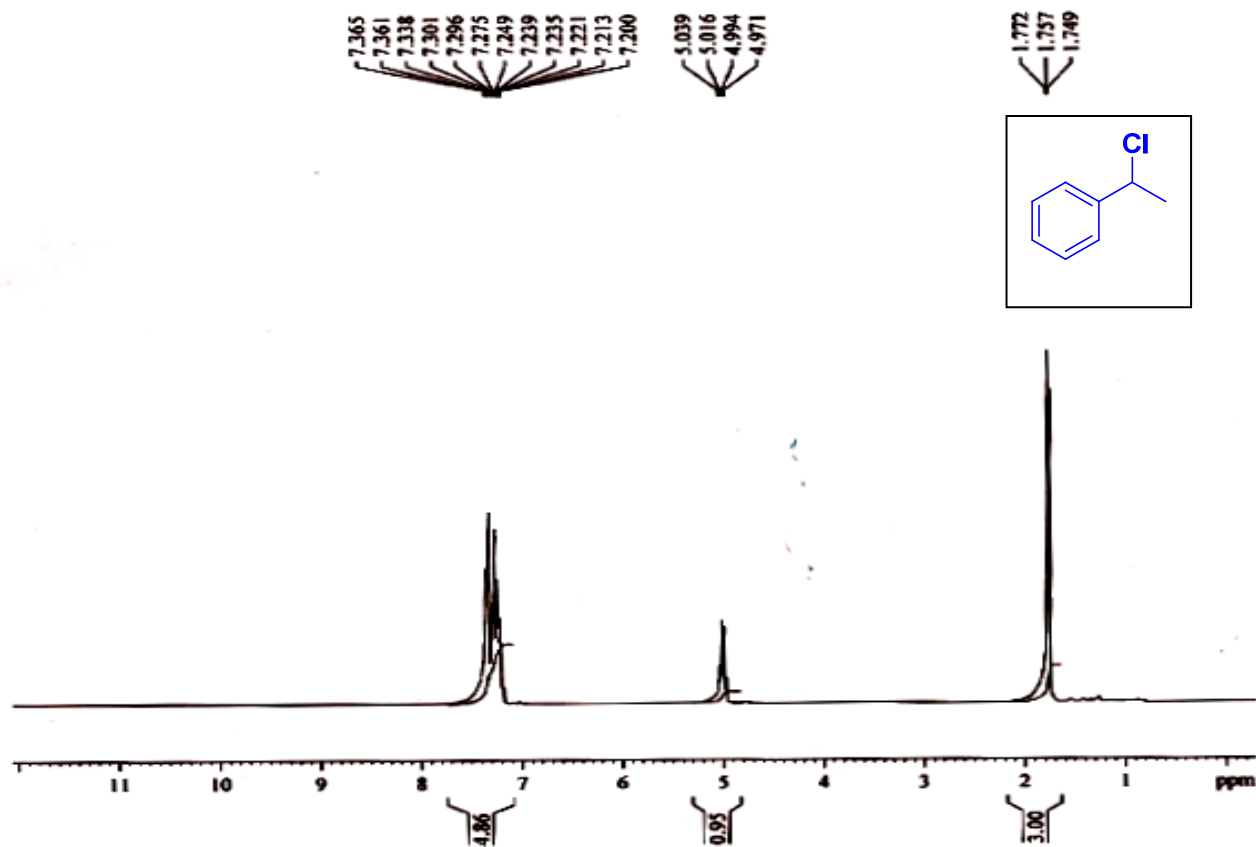

Spectrum 10. 300 MHz  $^1\text{H}$  NMR of compound 1c

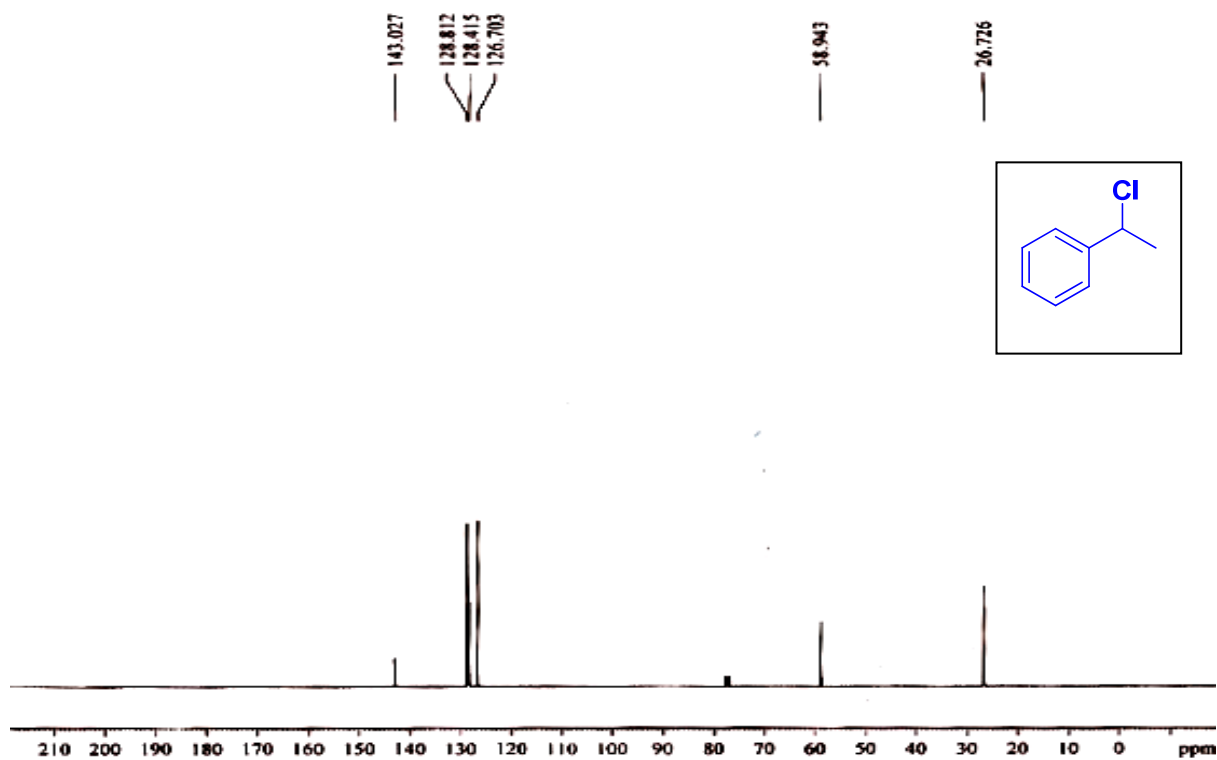

Spectrum 11. 75 MHz  $^{13}\text{C}$  NMR of compound 1c

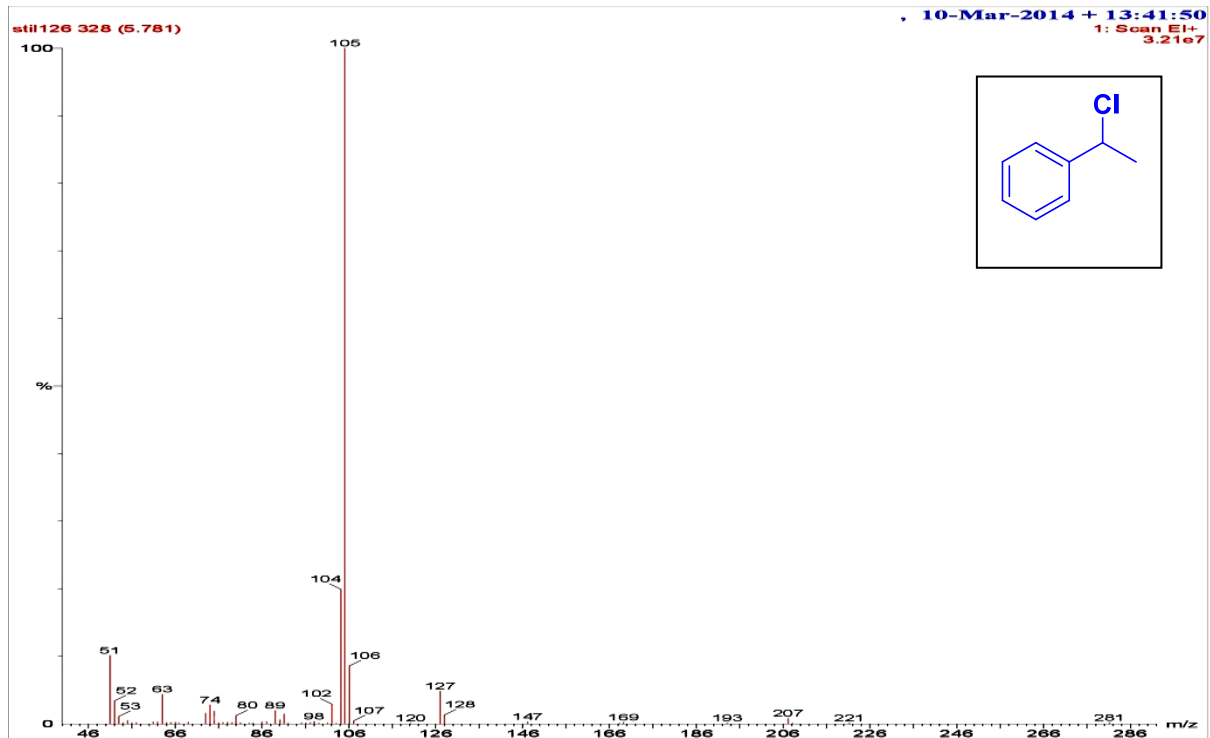

Spectrum 12. EI-MS of compound 1c



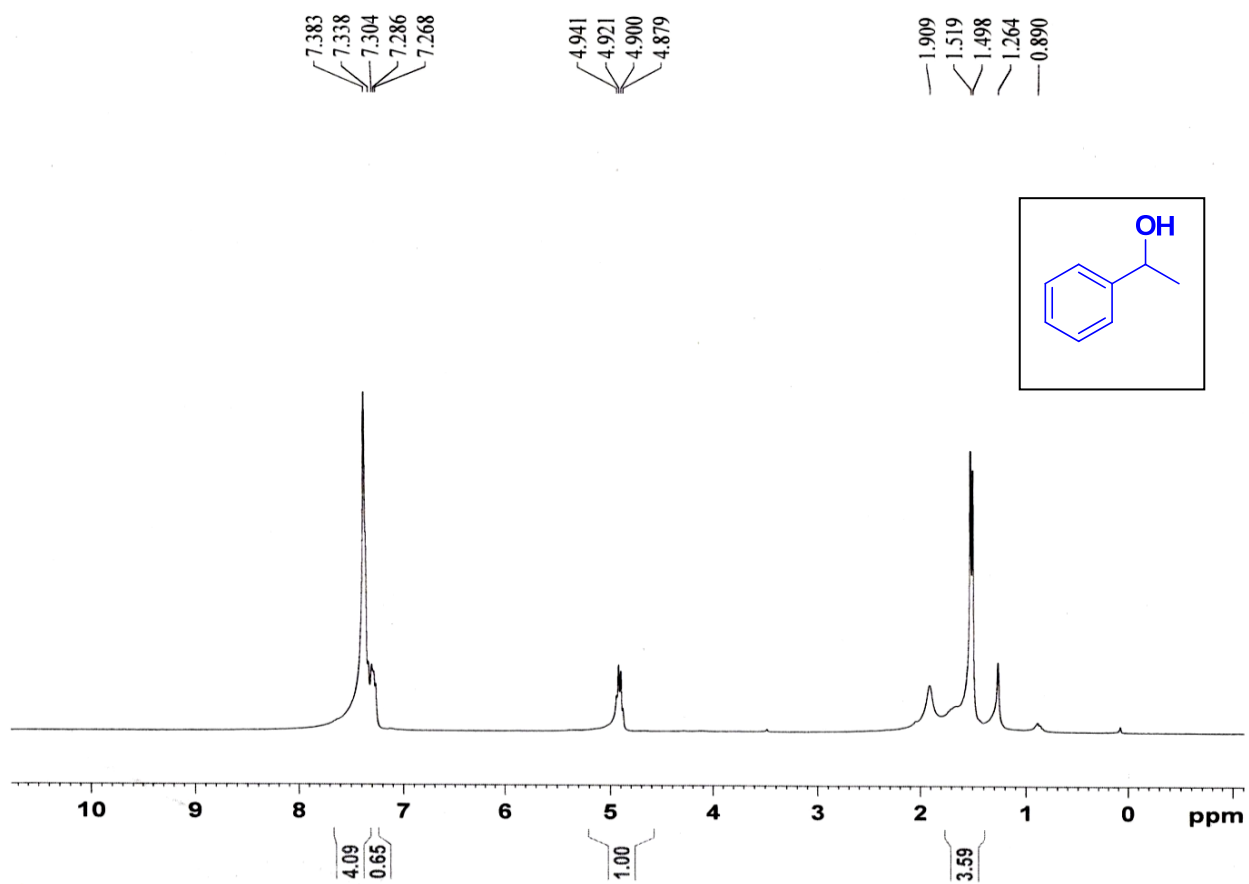

Spectrum 13. 300 MHz <sup>1</sup>H NMR of compound 1d

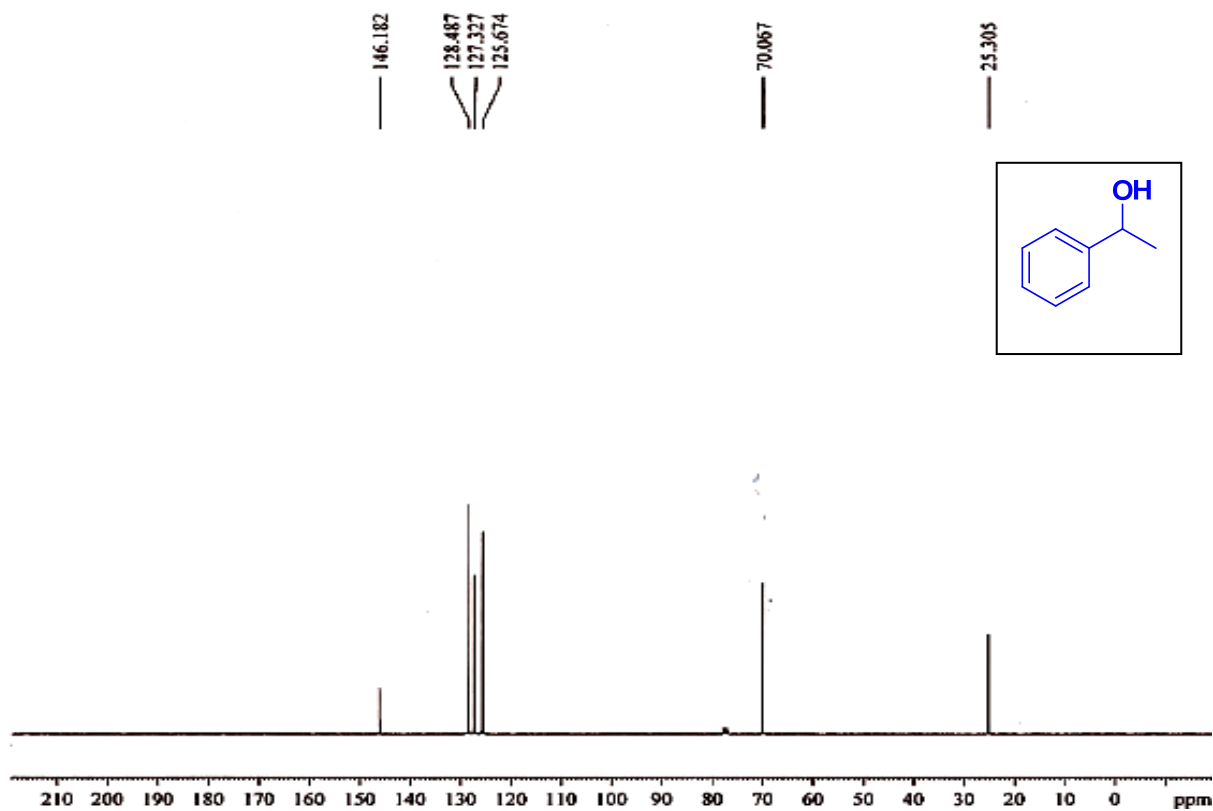

Spectrum 14. 75 MHz <sup>13</sup>C NMR of compound 1d

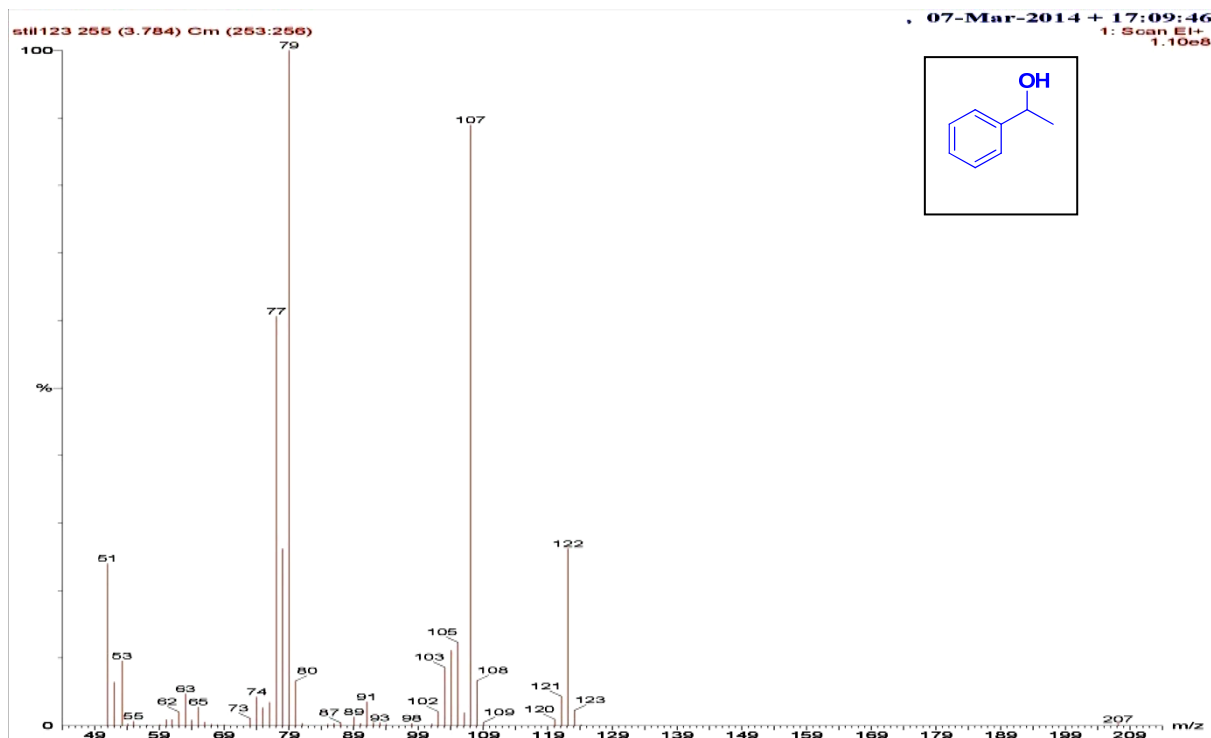

**Spectrum 15. EI-MS of compound 1d**

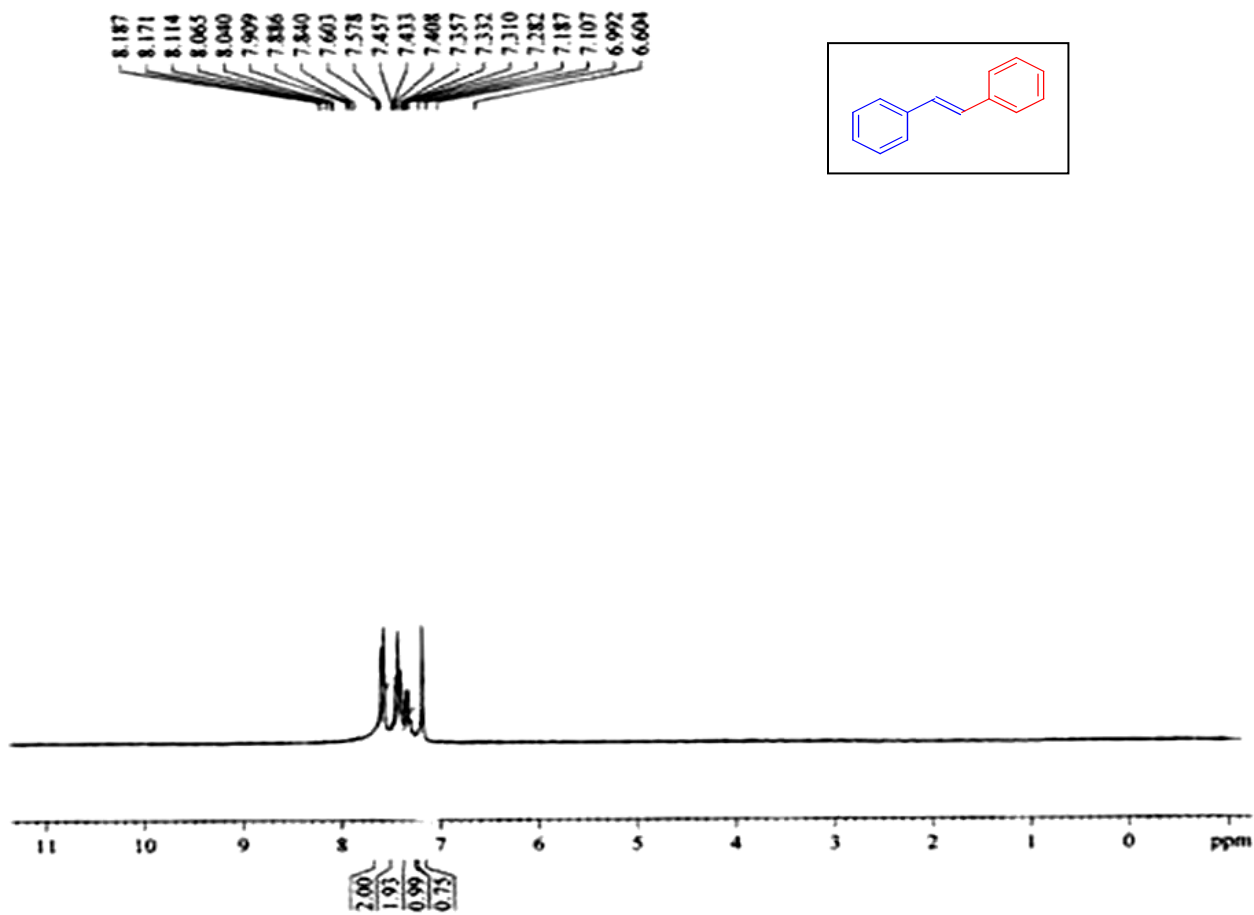

Spectrum 16. 300 MHz  $^1\text{H}$  NMR of compound 3a

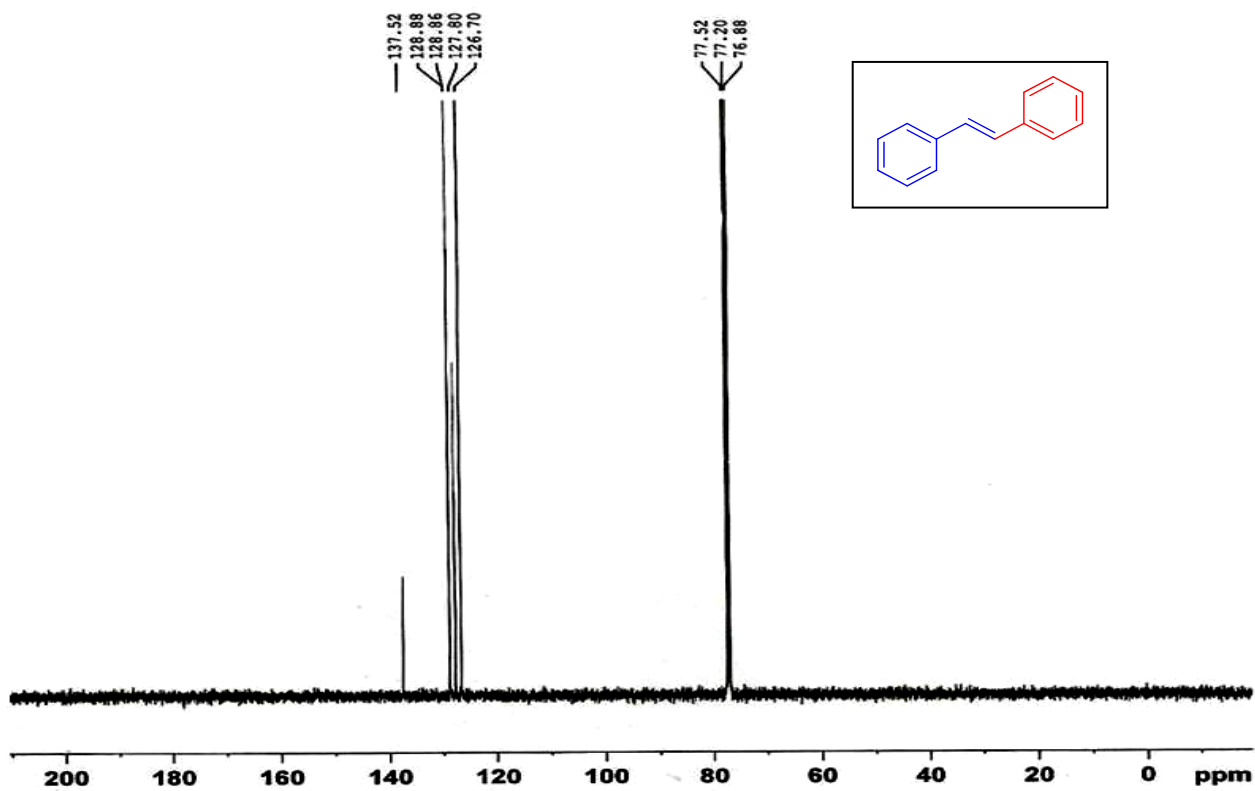

Spectrum 17. 75 MHz  $^{13}\text{C}$  NMR of compound 3a

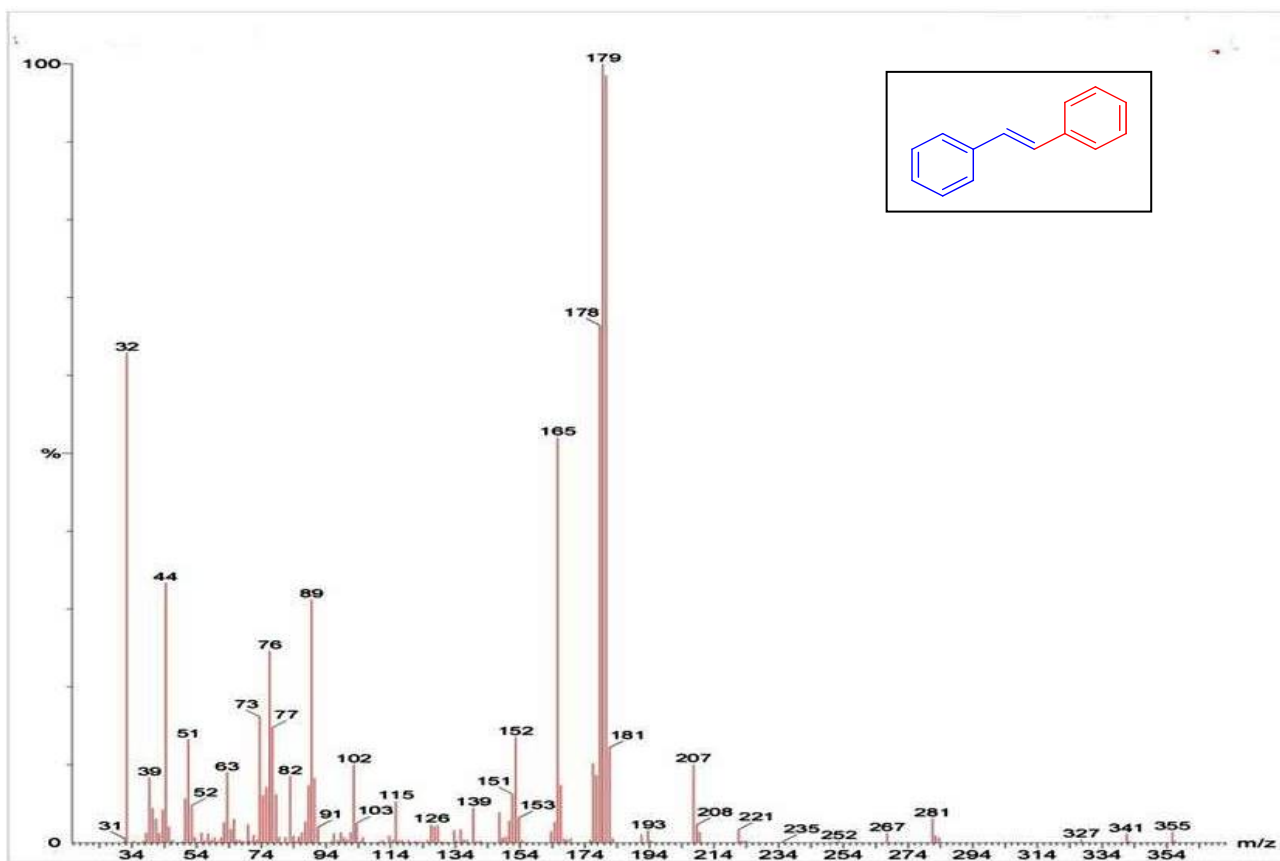

Spectrum 18. EI-MS of compound 3a

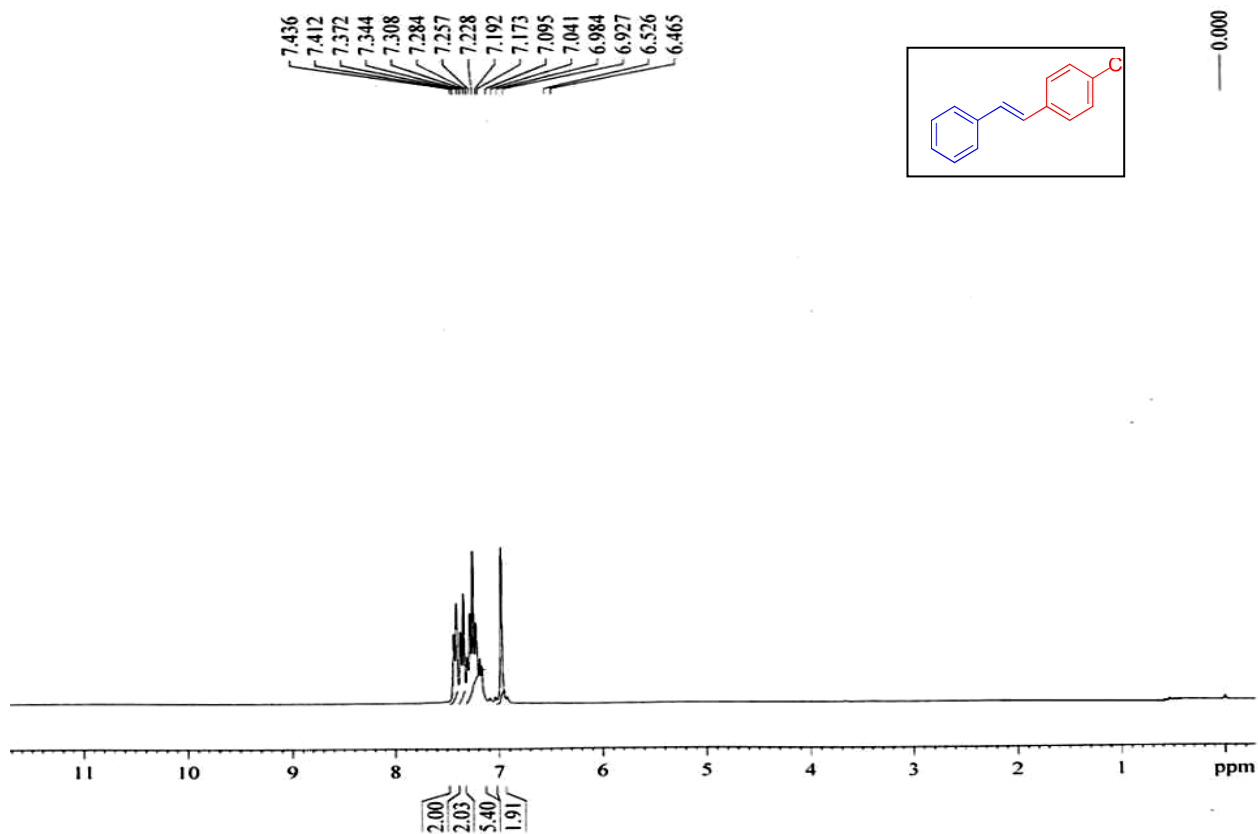

Spectrum 19. 300 MHz  $^1\text{H}$  NMR of compound **3b**

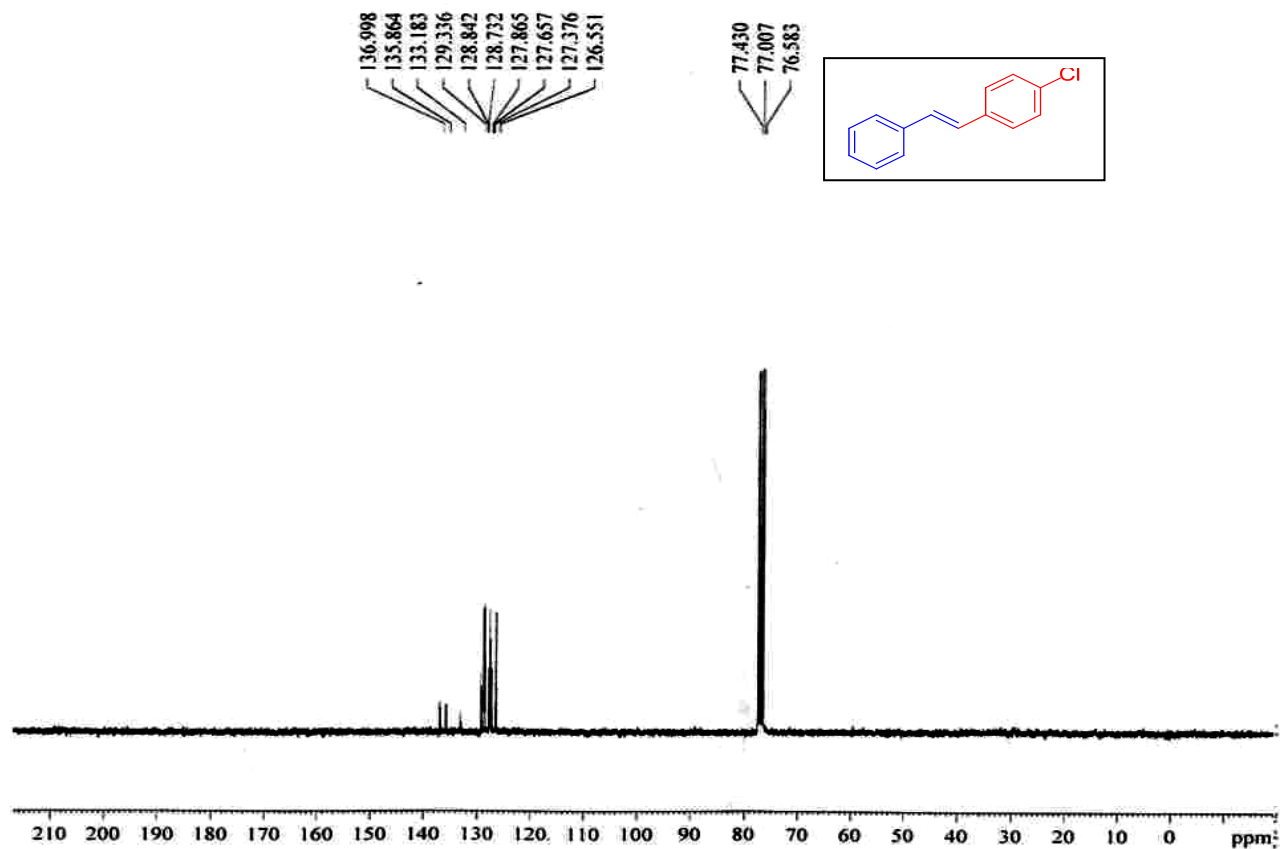

Spectrum 20. 75 MHz  $^{13}\text{C}$  NMR of compound **3b**

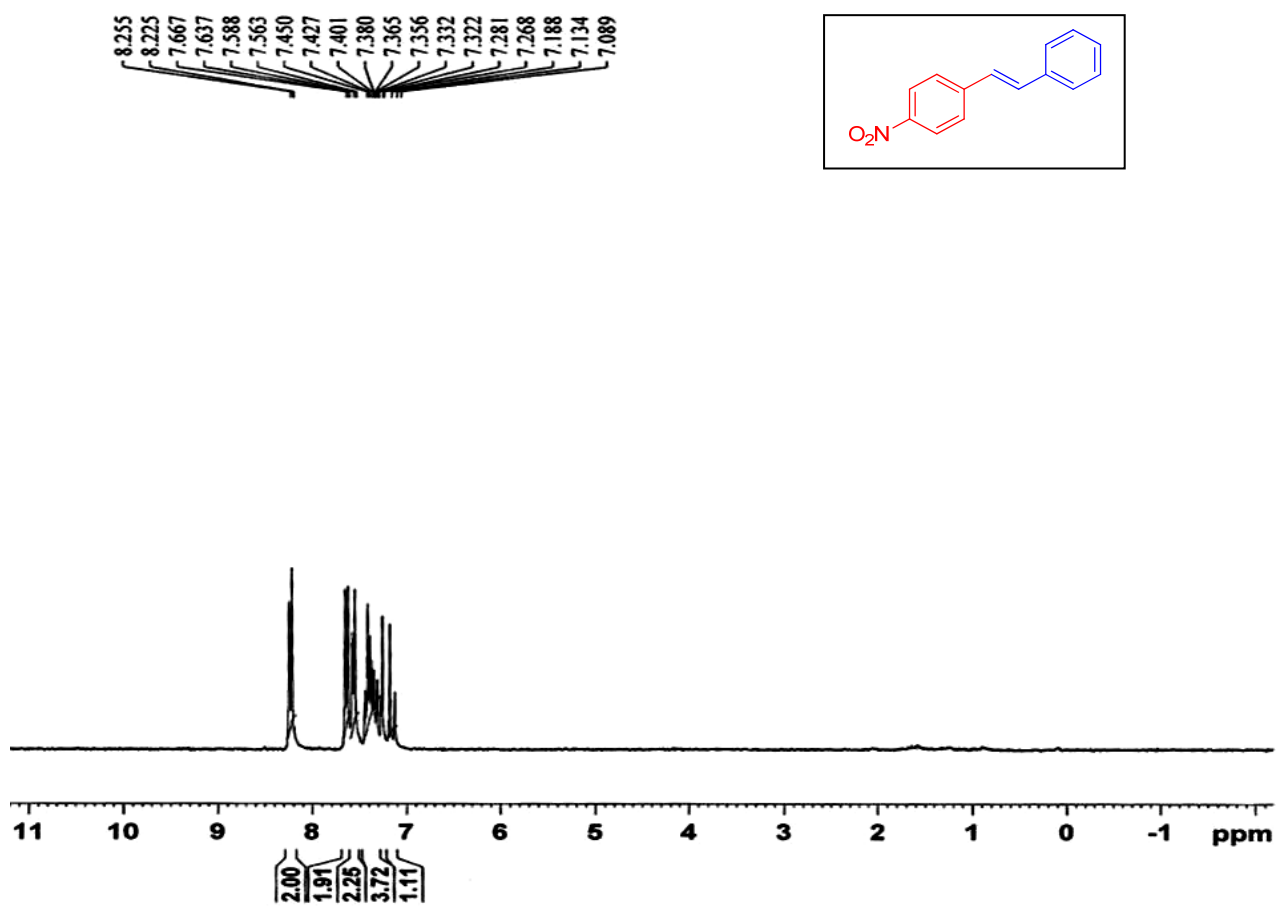

Spectrum 21. 300 MHz  $^1\text{H}$  NMR of compound 3c

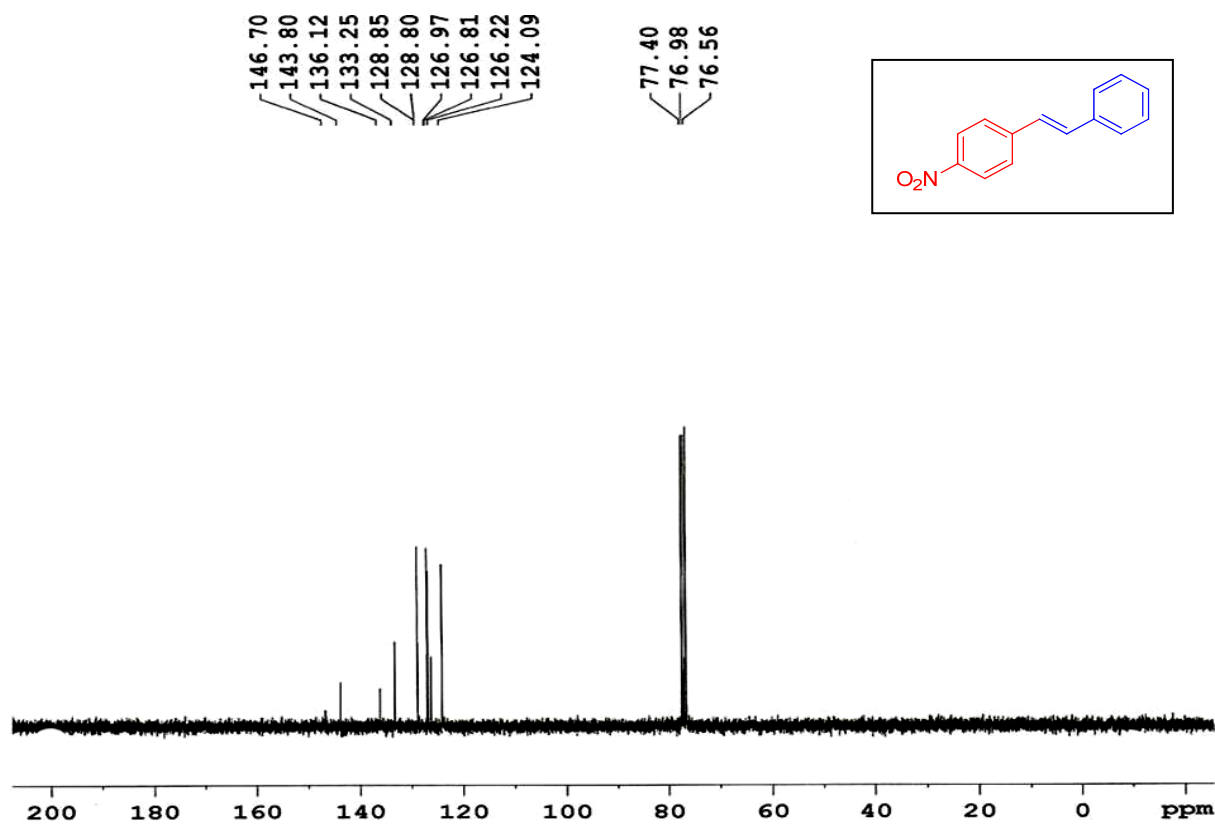

Spectrum 22. 75 MHz  $^{13}\text{C}$  NMR of compound 3c

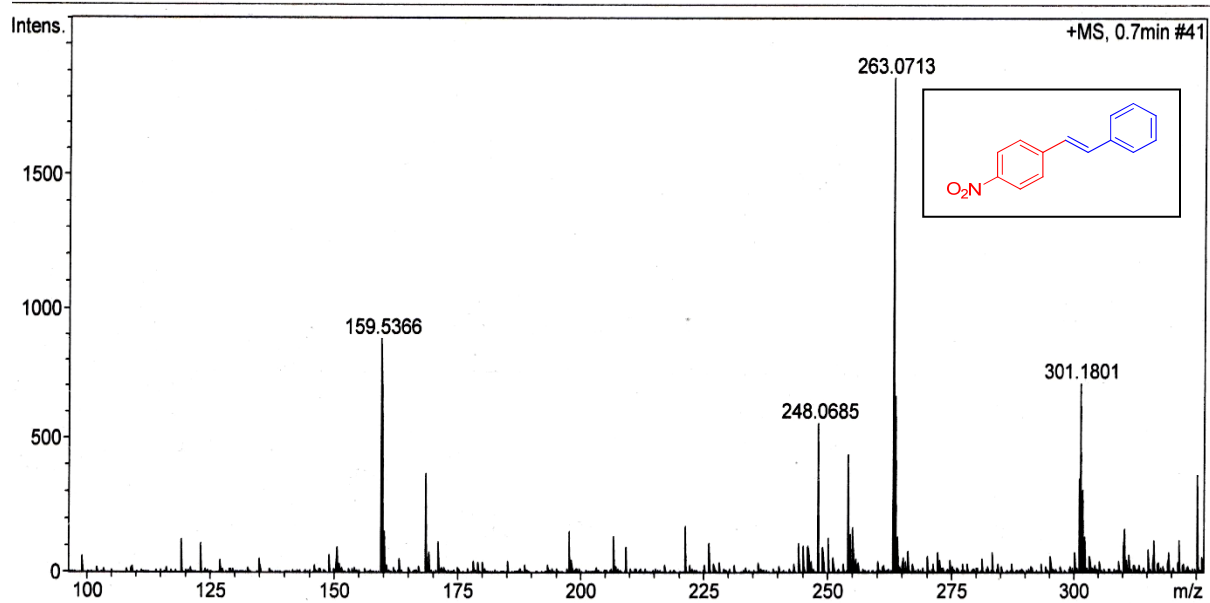

| Meas. m/z | # | Formula                                           | Score  | m/z      | err [ppm] | Mean err [ppm] | mSig ma | rdb | e <sup>-</sup> Conf | N-R ule |
|-----------|---|---------------------------------------------------|--------|----------|-----------|----------------|---------|-----|---------------------|---------|
| 248.0685  | 1 | C <sub>14</sub> H <sub>11</sub> NNaO <sub>2</sub> | 100.00 | 248.0682 | -1.2      | -1.2           | 90.0    | 9.5 | even                | ok      |

**Spectrum 23.** HRMS-ESI of compound **3c**

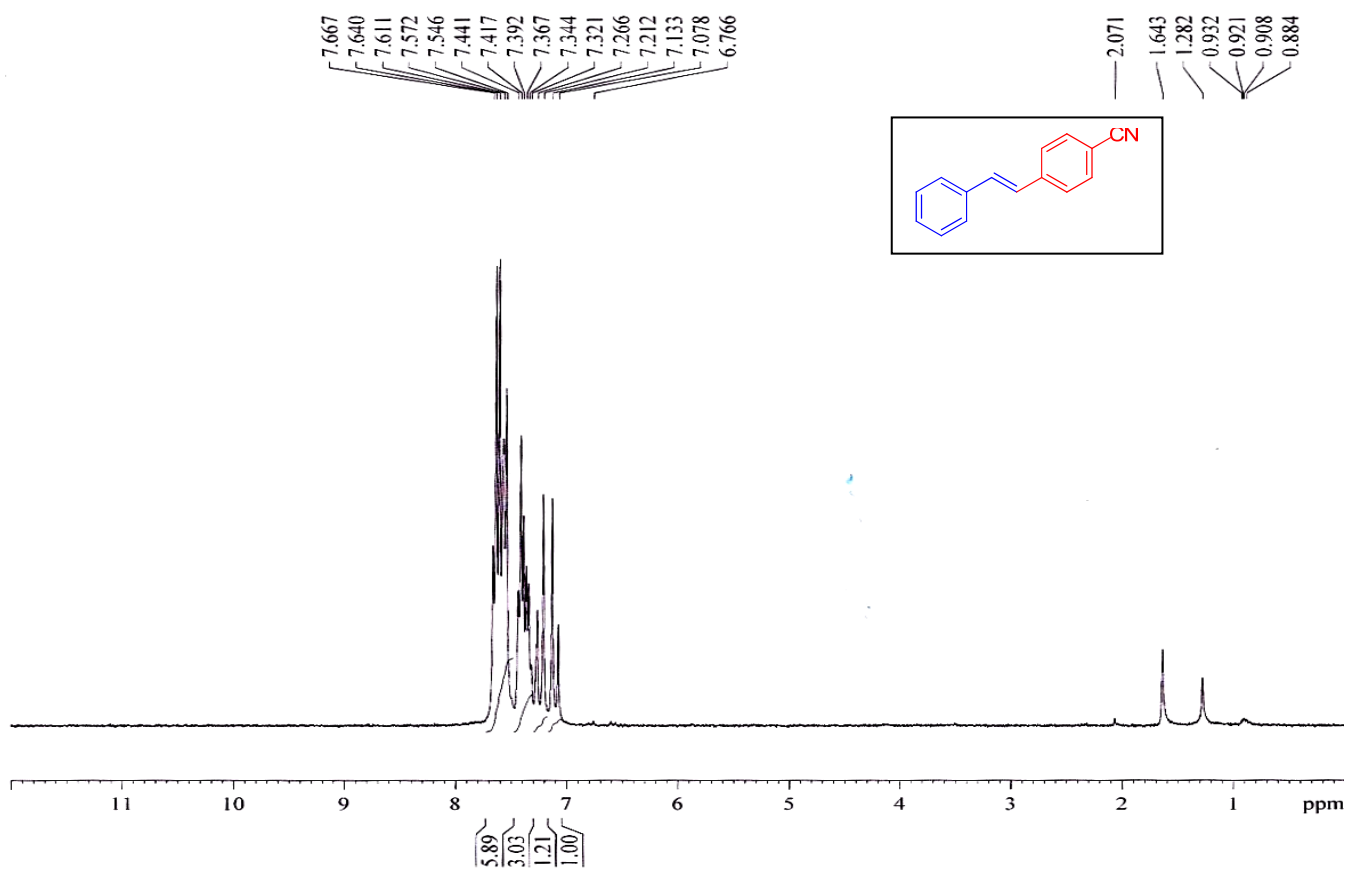

**Spectrum 24.** 300 MHz  $^1\text{H}$  NMR of compound **3d**

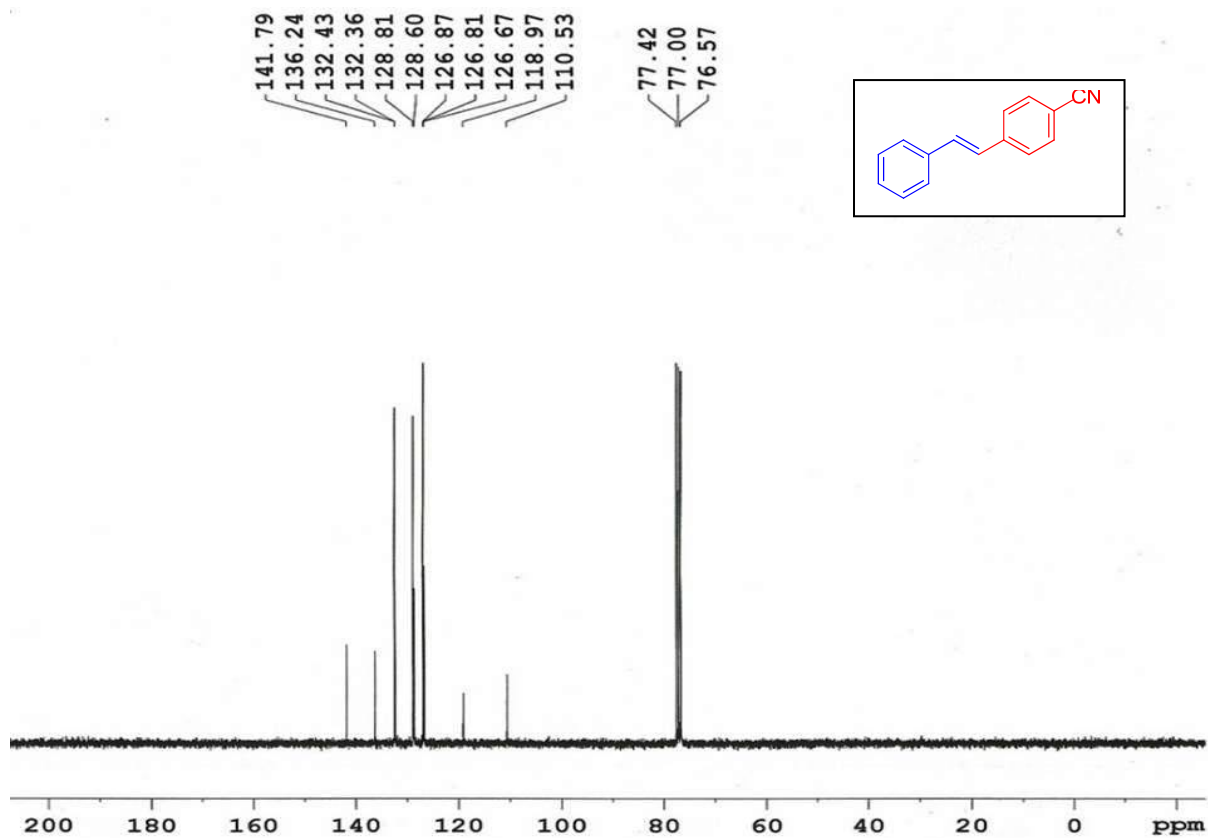

**Spectrum 25.** 75 MHz  $^{13}\text{C}$  NMR of compound **3d**



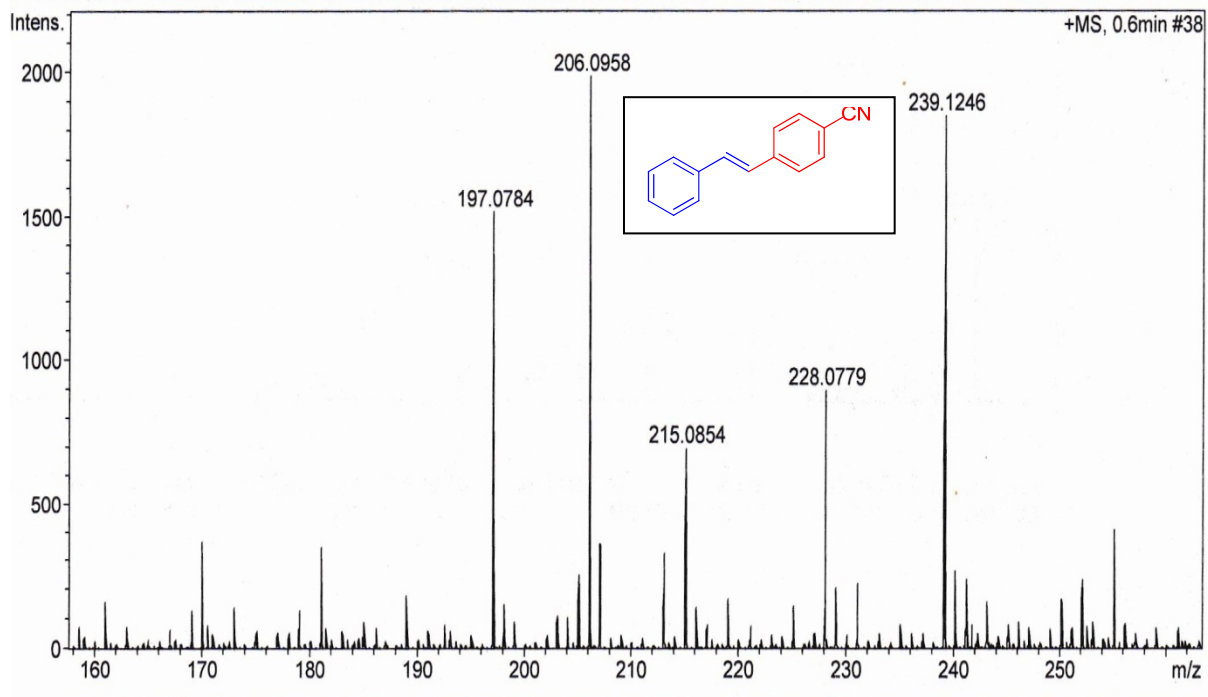

| Meas. m/z | # | Formula                           | Score  | m/z      | err [ppm] | Mean err [ppm] | mSigma | rdb  | e <sup>-</sup> Conf | N-Rule |
|-----------|---|-----------------------------------|--------|----------|-----------|----------------|--------|------|---------------------|--------|
| 206.0958  | 1 | C <sub>15</sub> H <sub>12</sub> N | 100.00 | 206.0964 | 2.9       | 2.9            | 96.1   | 10.5 | even                | ok     |

**Spectrum 26.** HRMS-ESI of compound **3d**

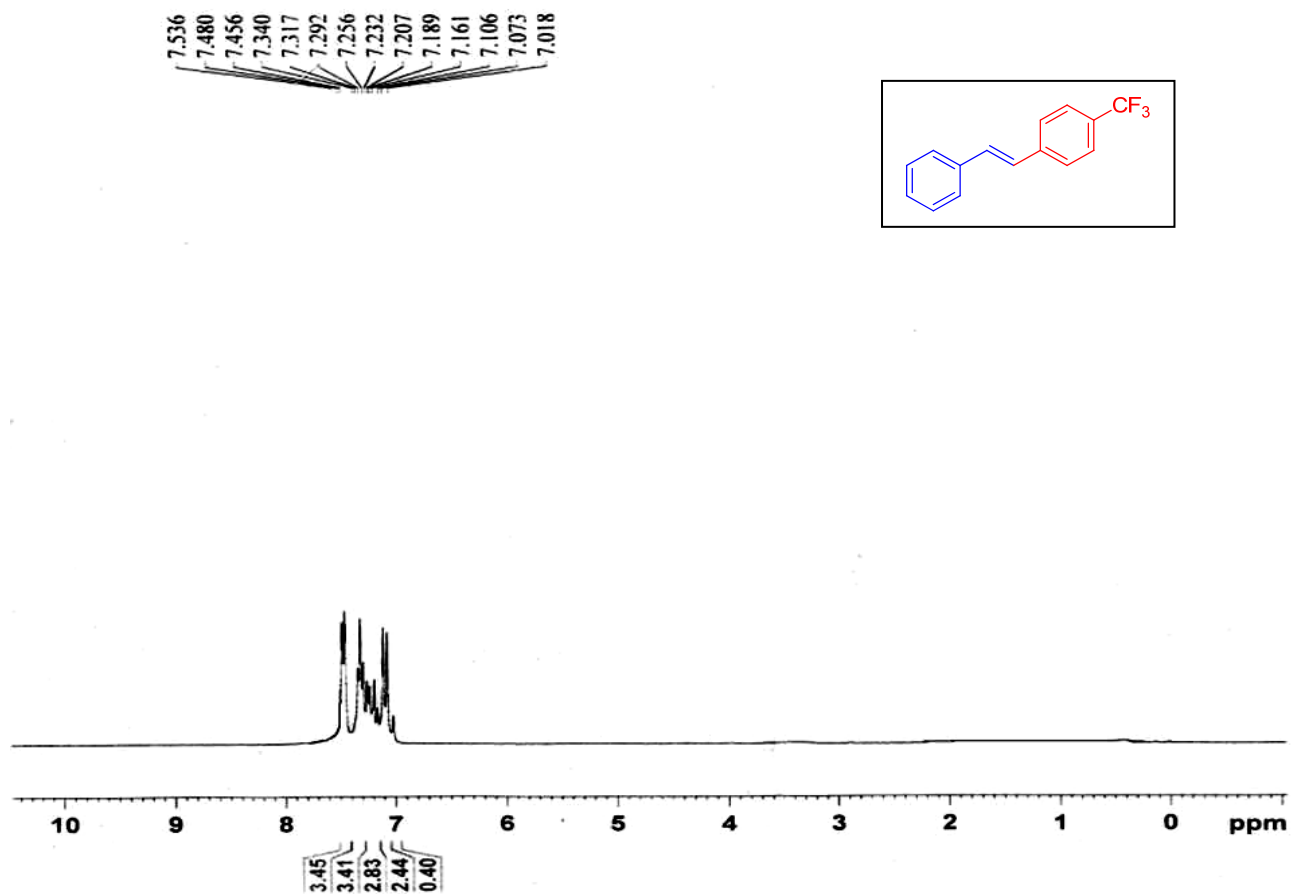

Spectrum 27. 300 MHz  $^1\text{H}$  NMR of compound **3e**

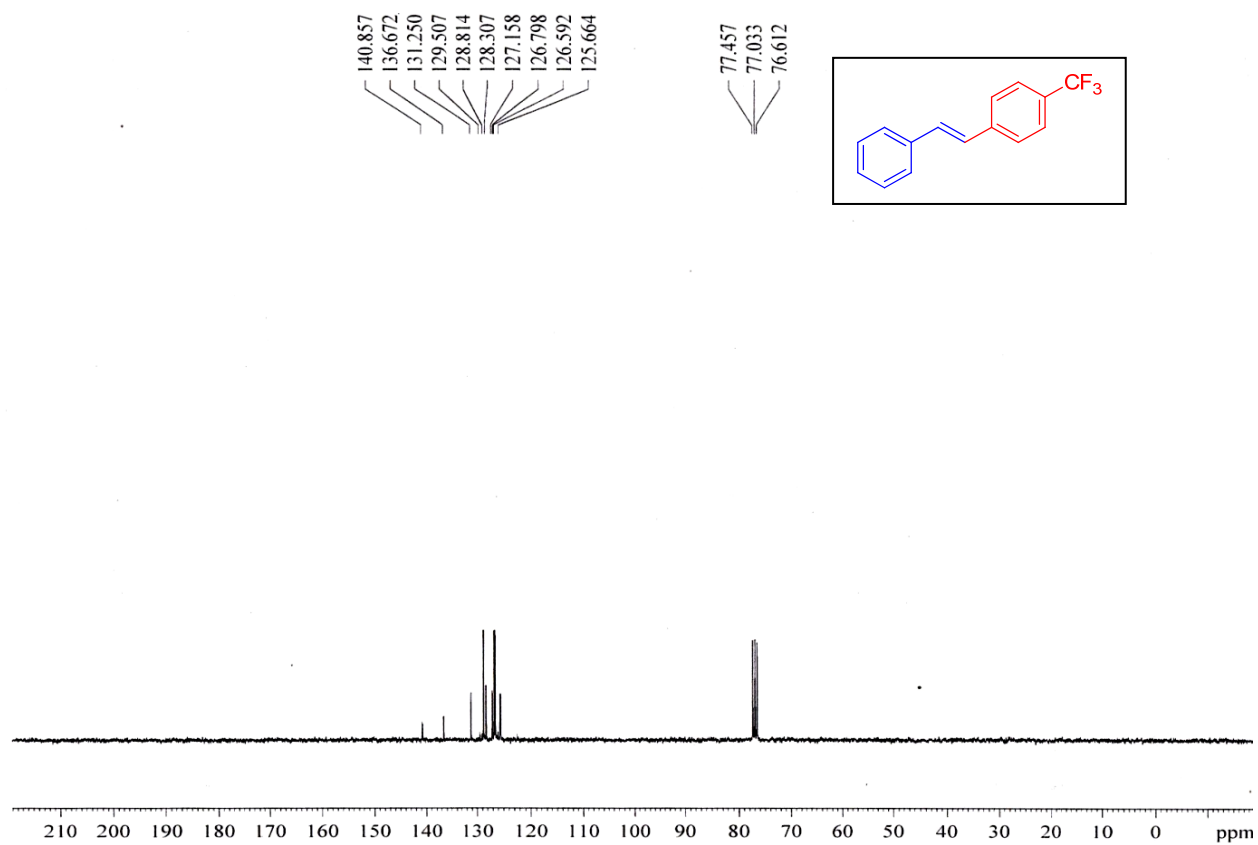

Spectrum 28. 75 MHz  $^{13}\text{C}$  NMR of compound **3e**

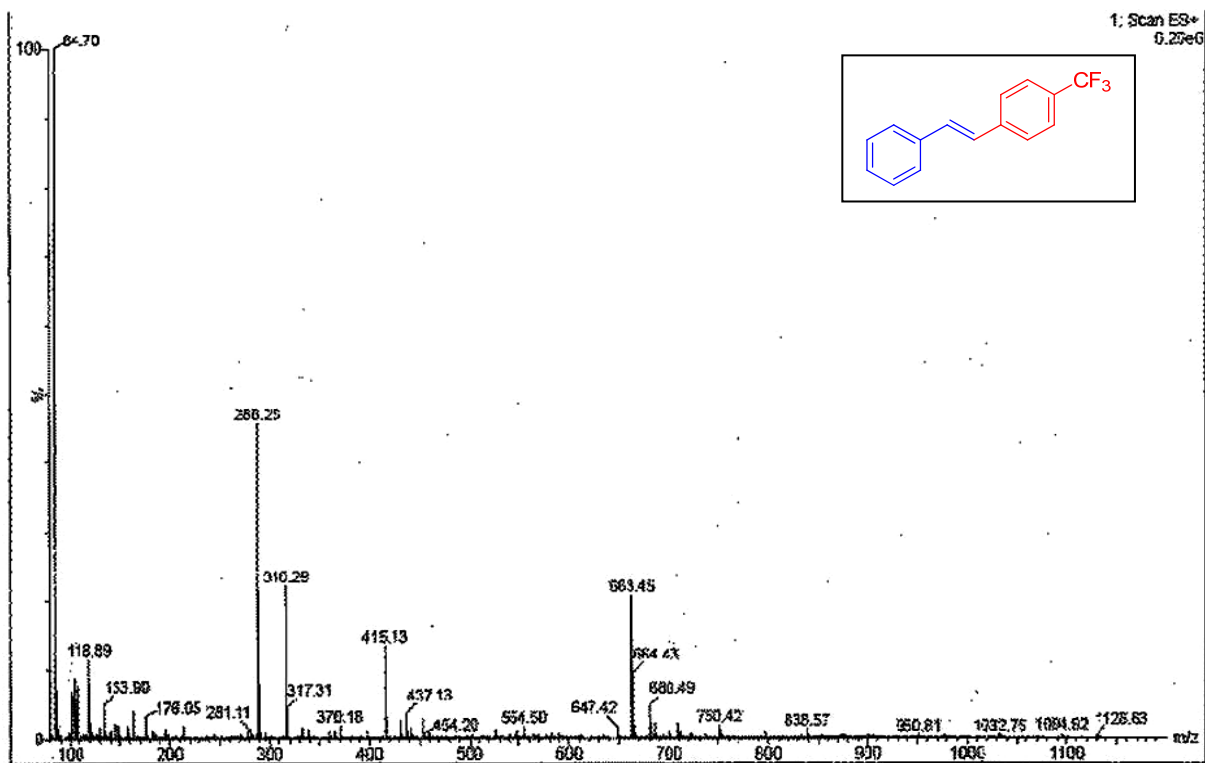

Spectrum 29. LRMS-ESI of compound 3e

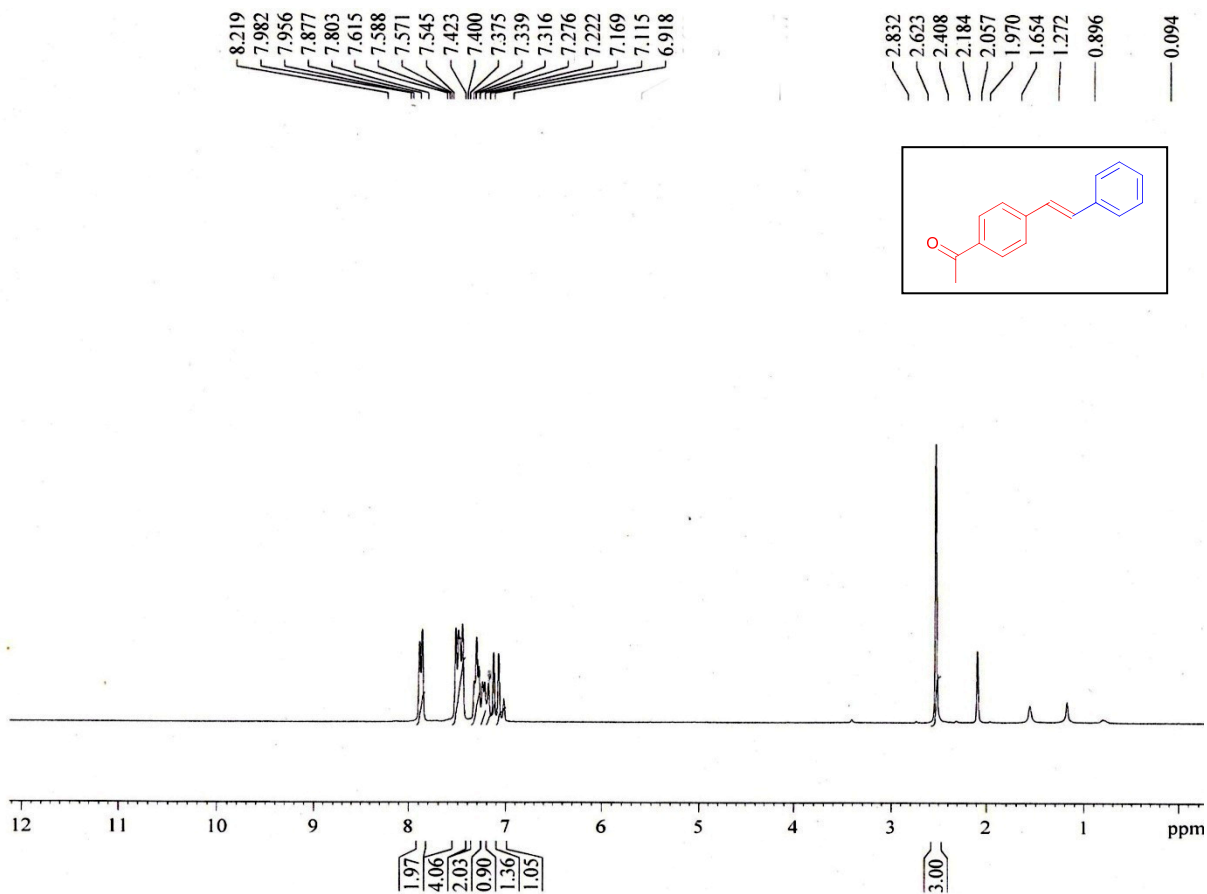

Spectrum 30. 300 MHz <sup>1</sup>H NMR of compound 3f

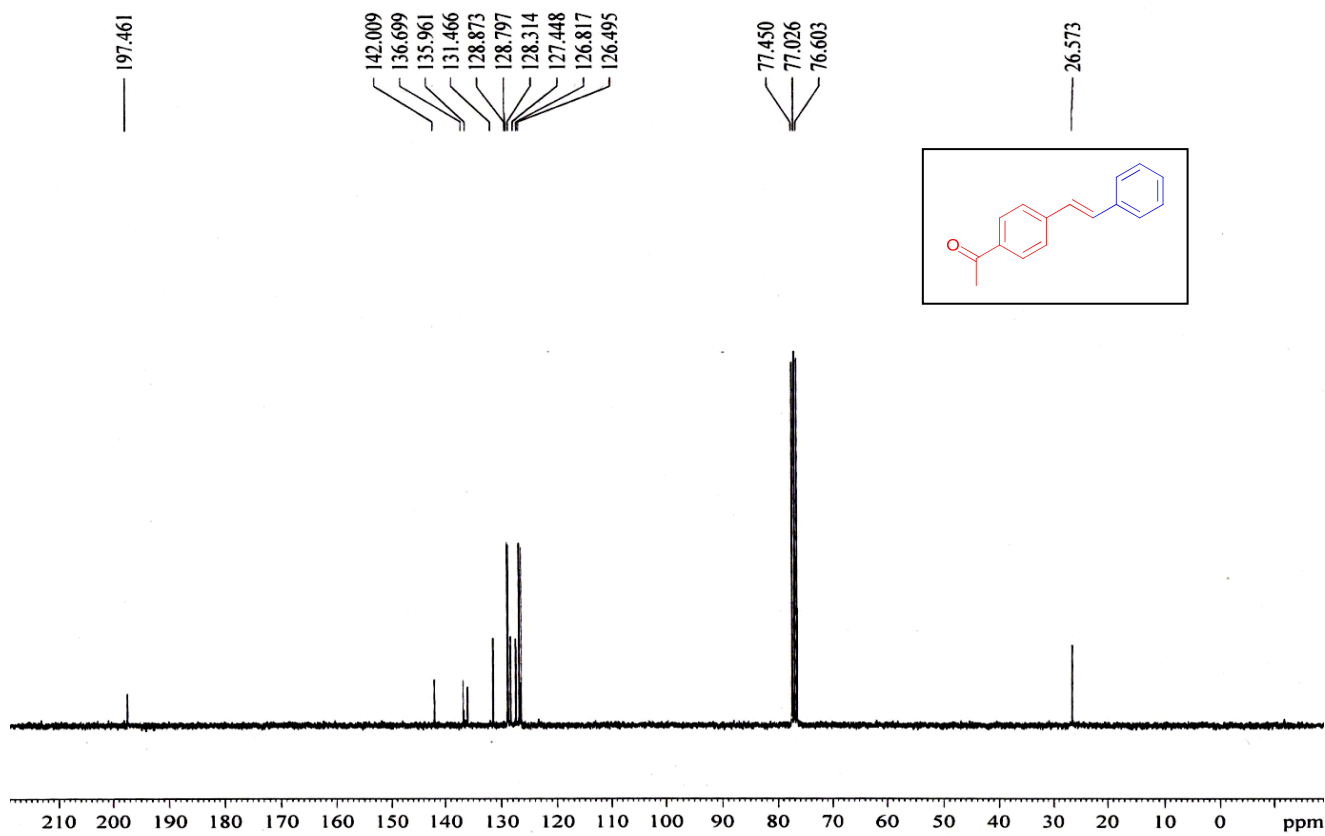

Spectrum 31. 75 MHz <sup>13</sup>C NMR of compound 3f

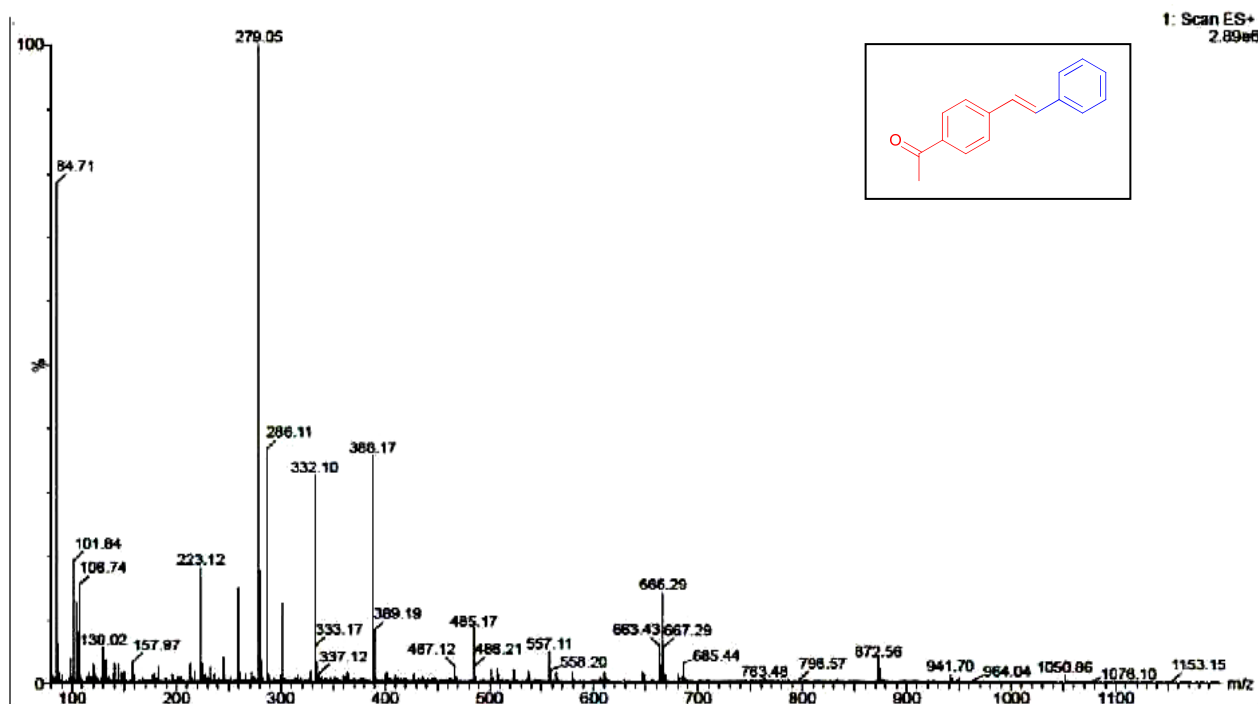

Spectrum 32. LRMS-ESI of compound 3f

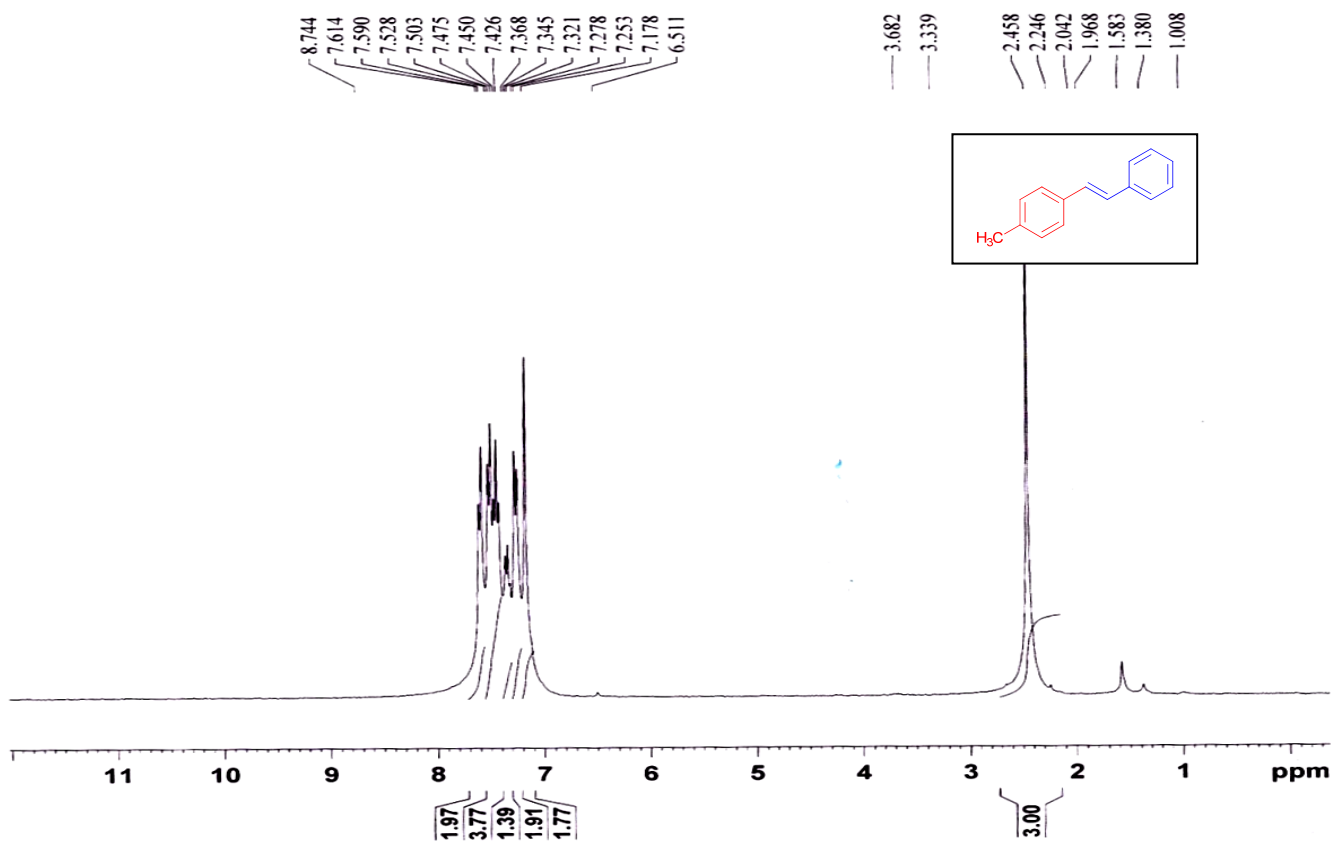

Spectrum 33. 300 MHz <sup>1</sup>H NMR of compound 3g

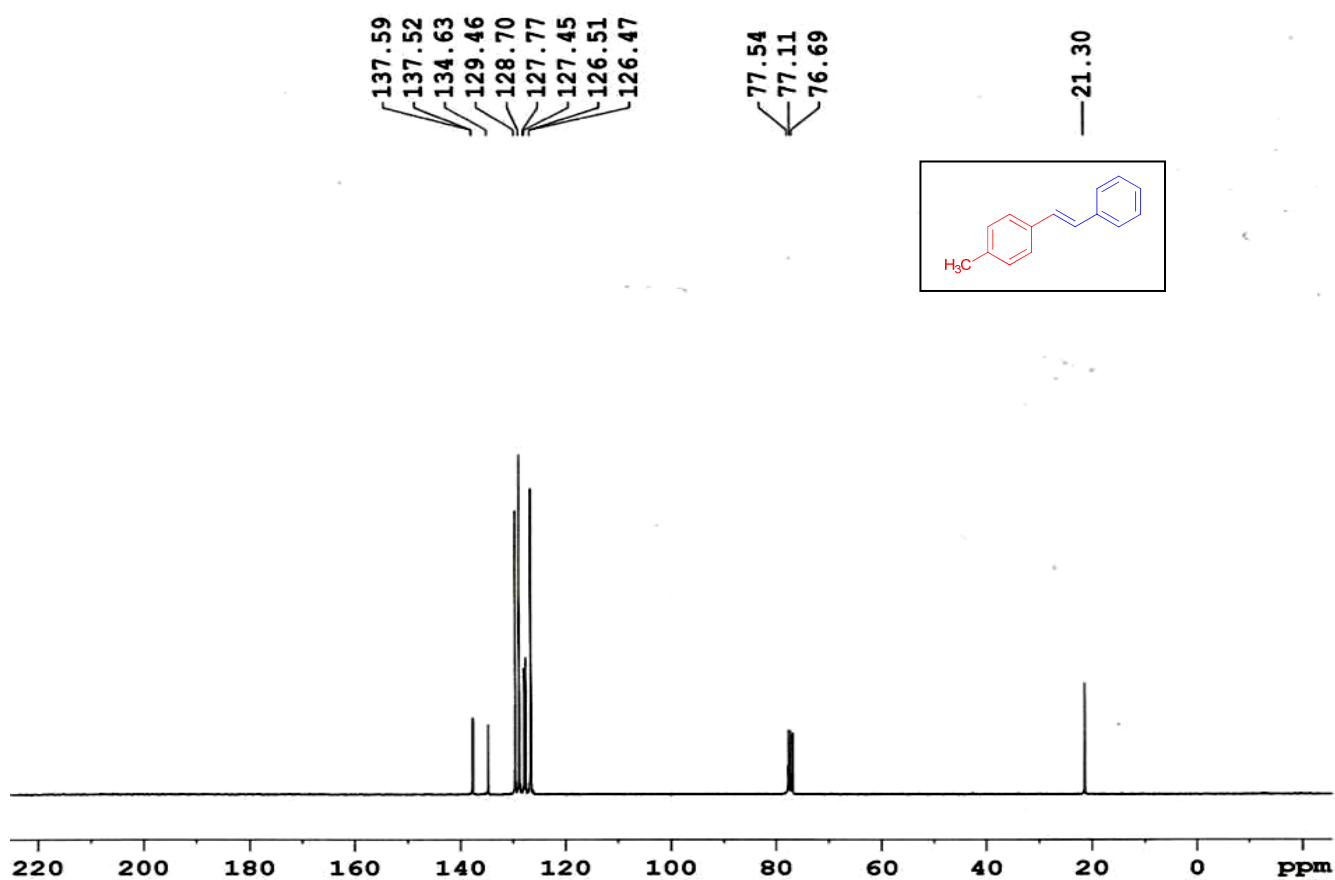

Spectrum 34. 75 MHz <sup>13</sup>C NMR of compound 3g

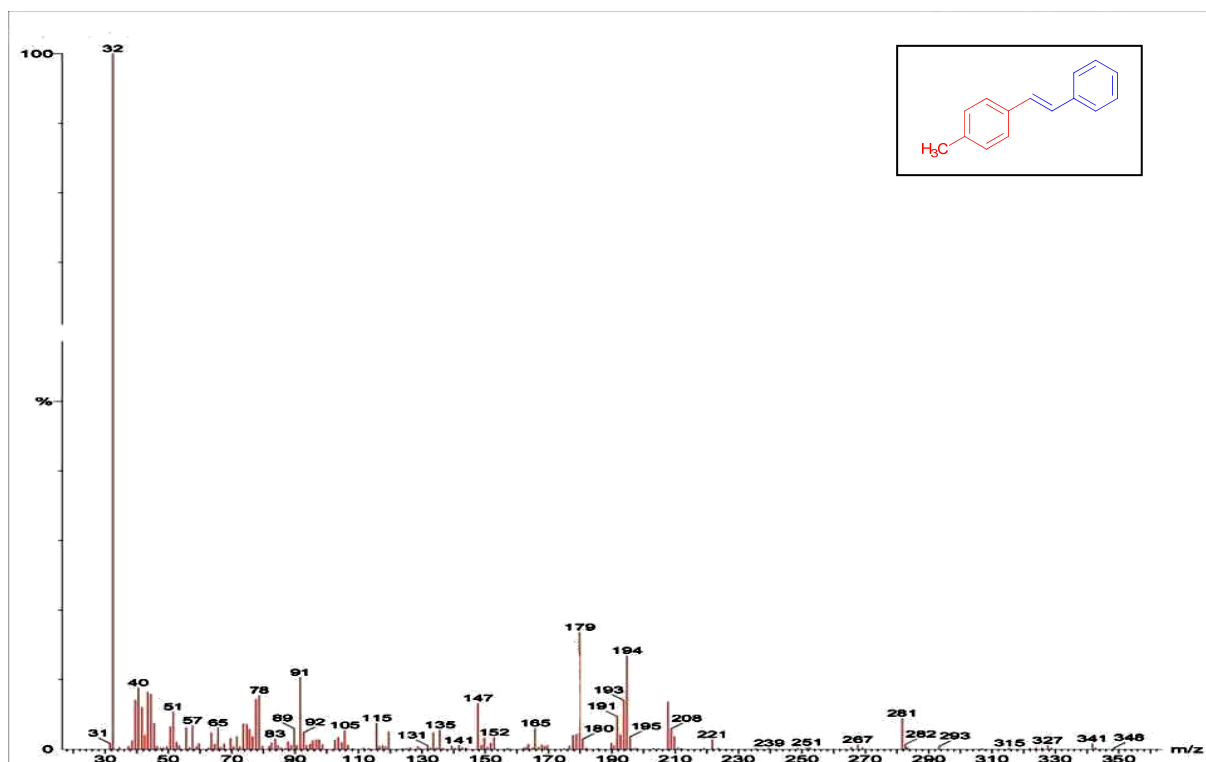

Spectrum 35. EI-MS of compound 3g

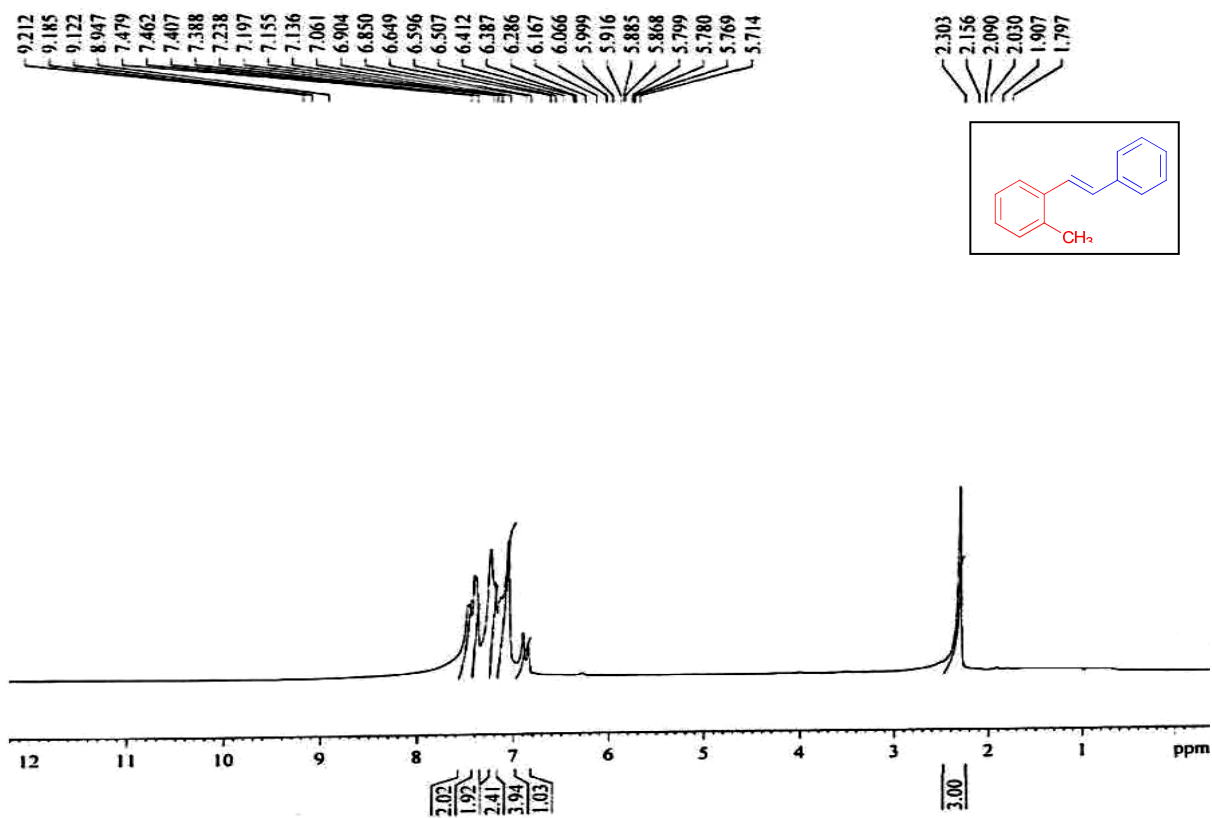

Spectrum 36. 300 MHz  $^1\text{H}$  NMR of compound 3h

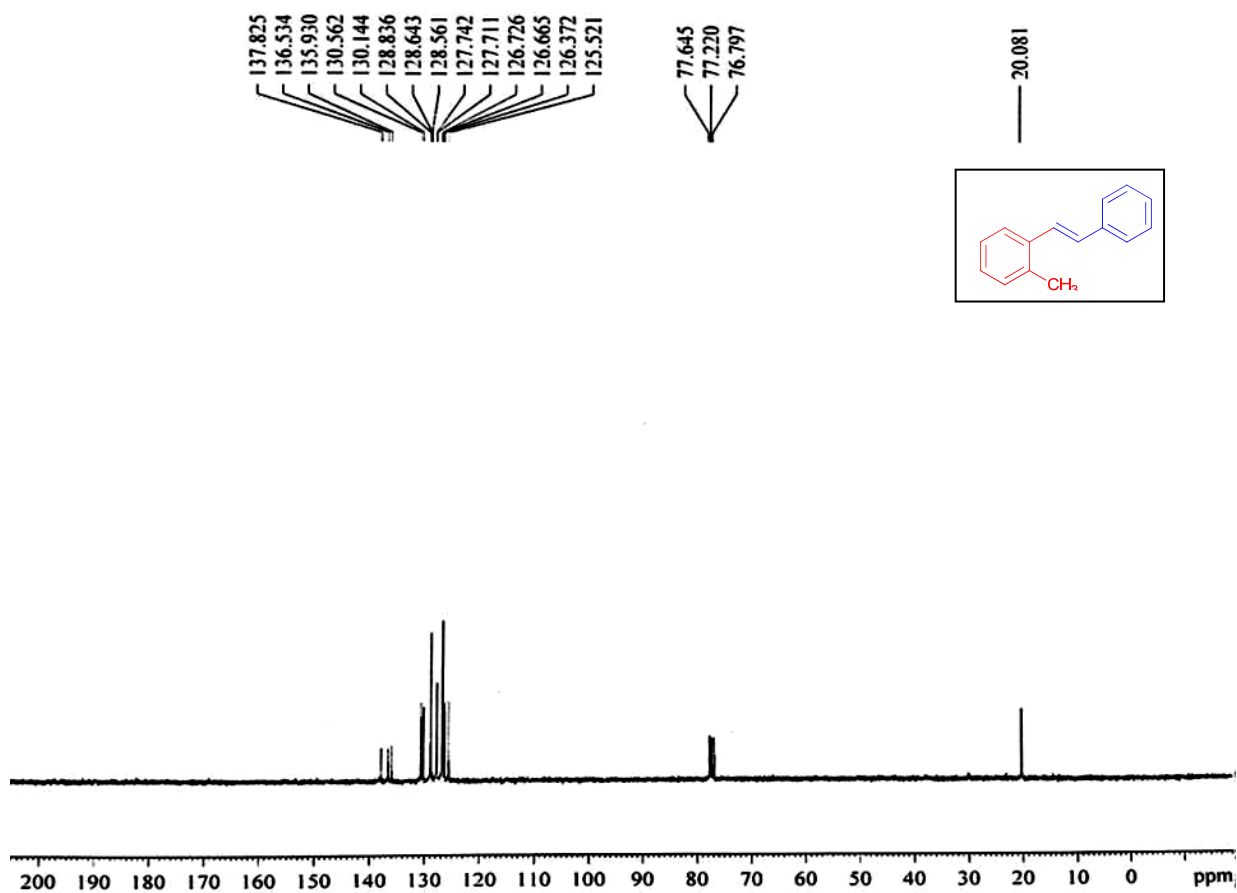

Spectrum 37. 75 MHz  $^{13}\text{C}$  NMR of compound 3h



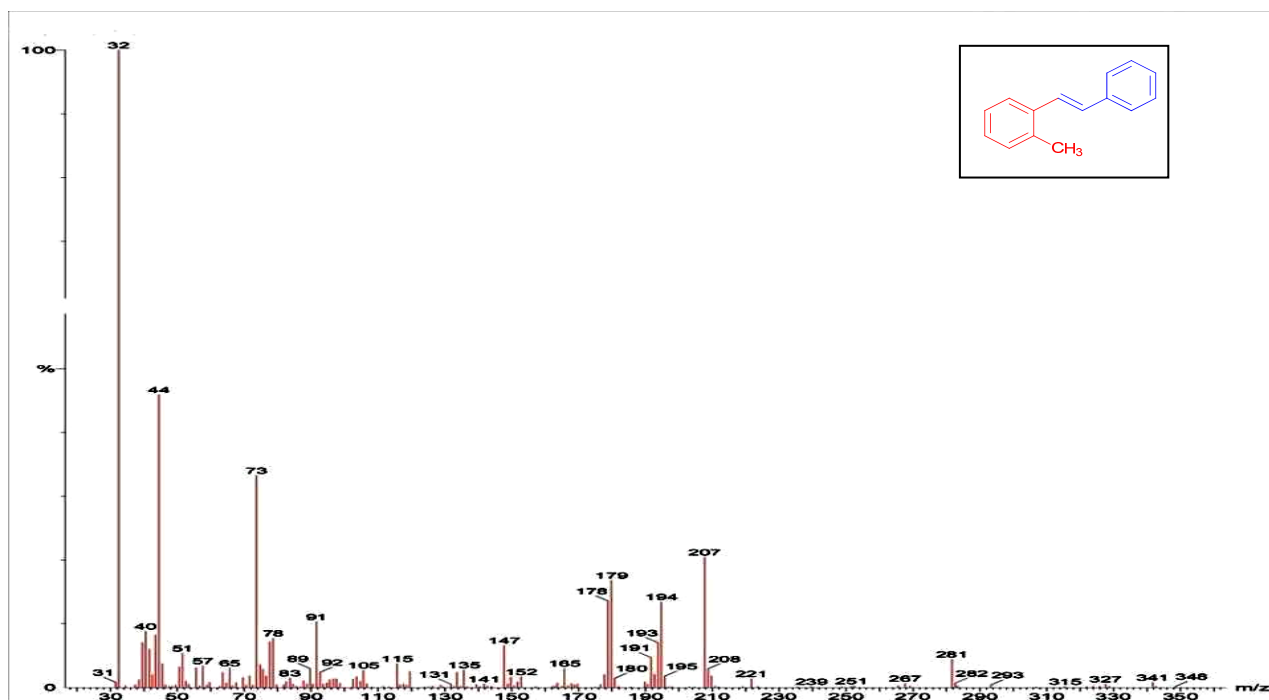

Spectrum 38. EI-MS of compound 3h

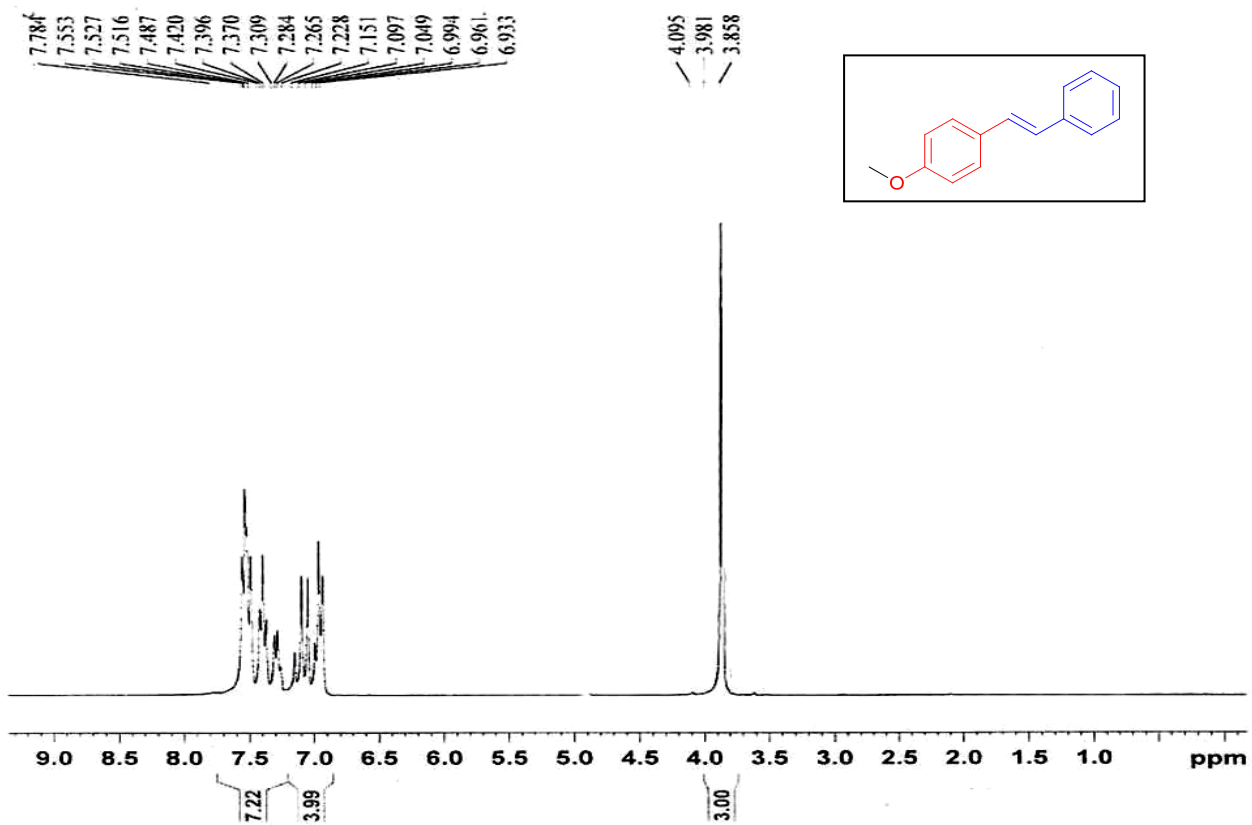

Spectrum 39. 300 MHz  $^1\text{H}$  NMR of compound **3i**

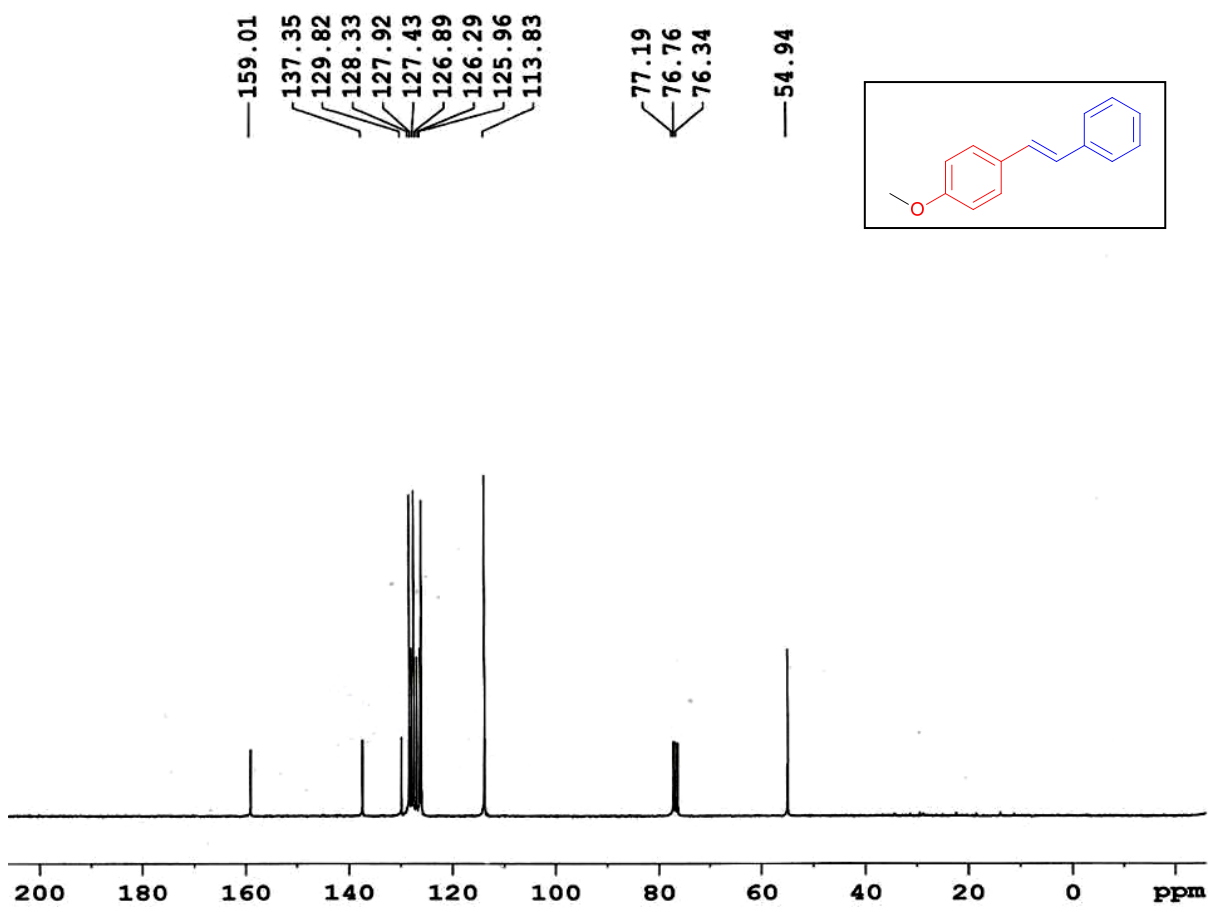

Spectrum 40. 75 MHz  $^{13}\text{C}$  NMR of compound **3i**

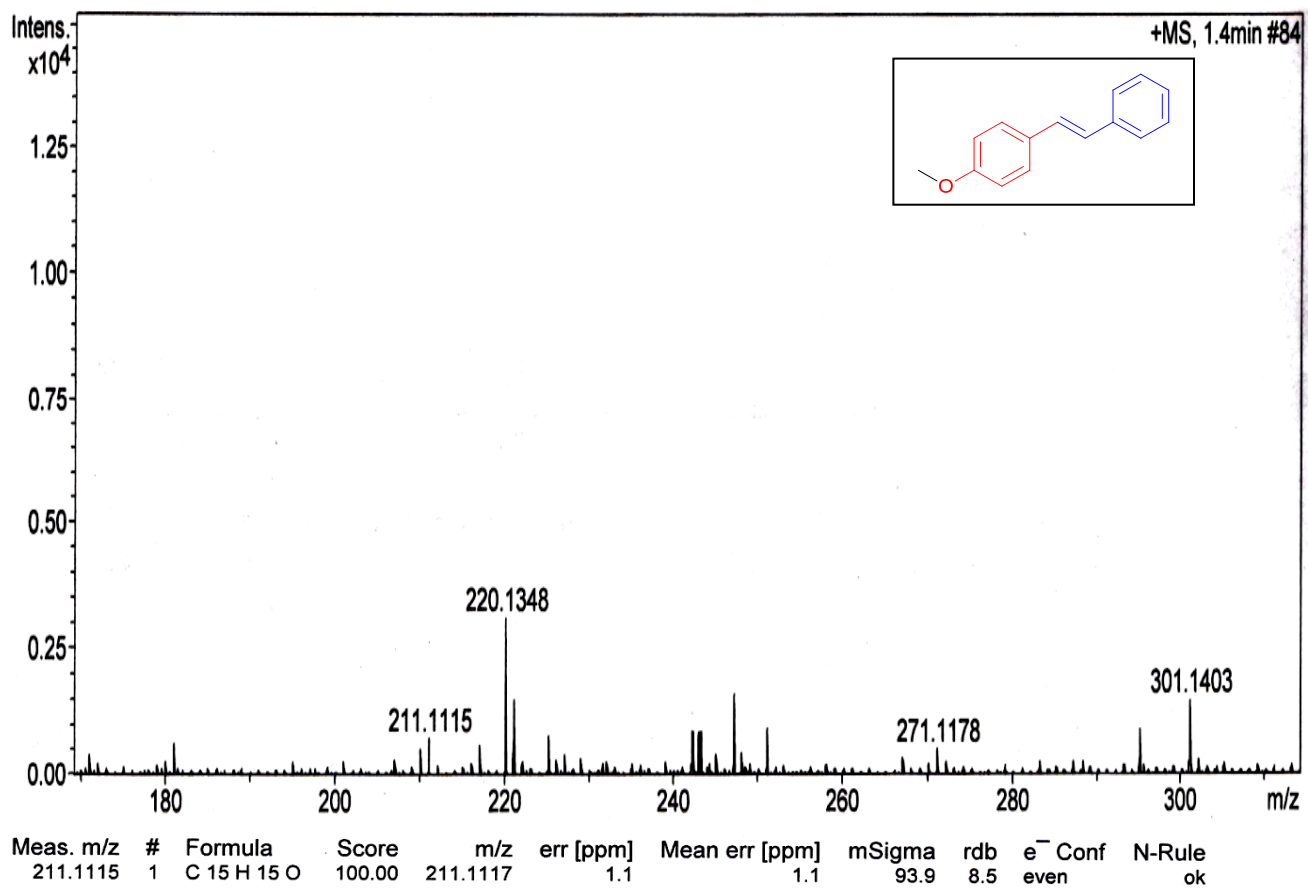

**Spectrum 41.** HRMS-ESI of compound **3i**

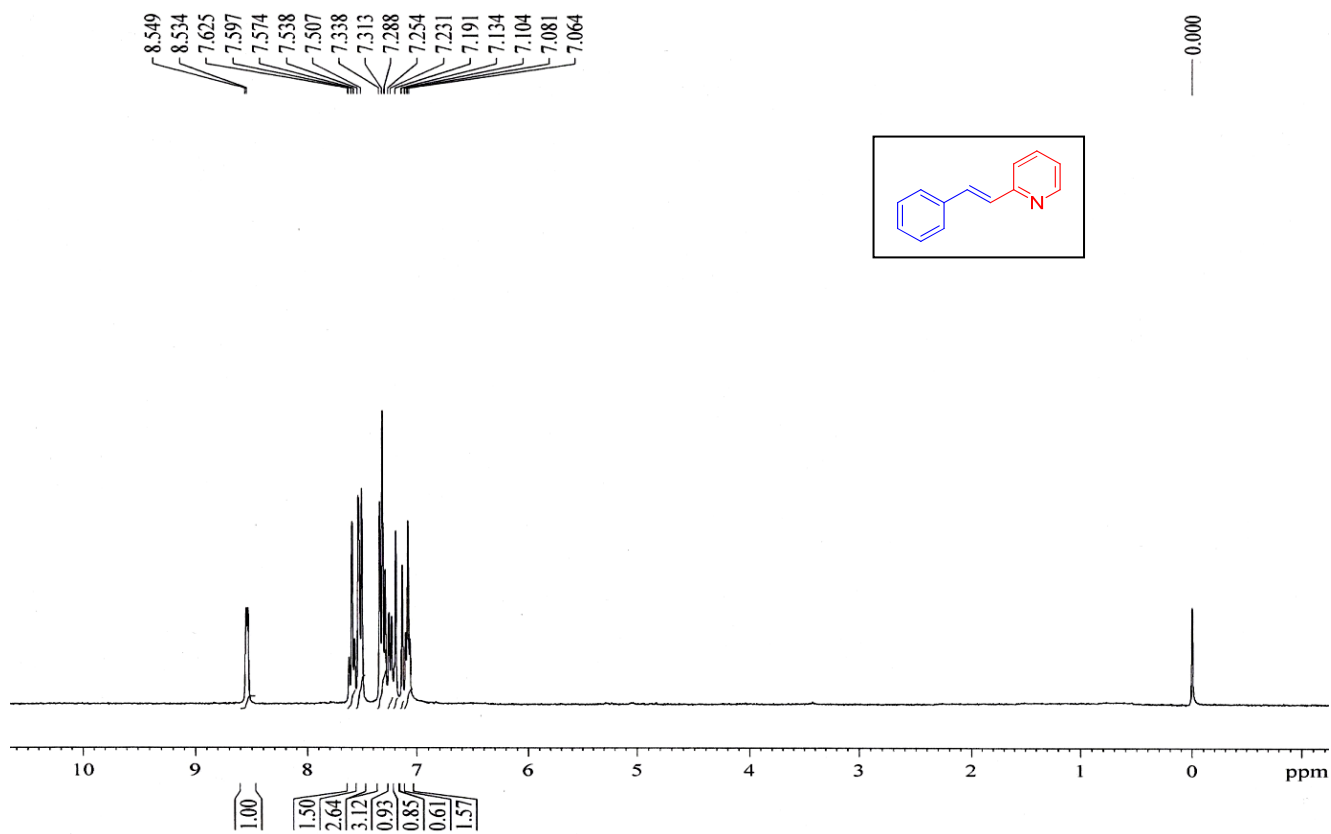

Spectrum 42. 300 MHz  $^1\text{H}$  NMR of compound **3j**

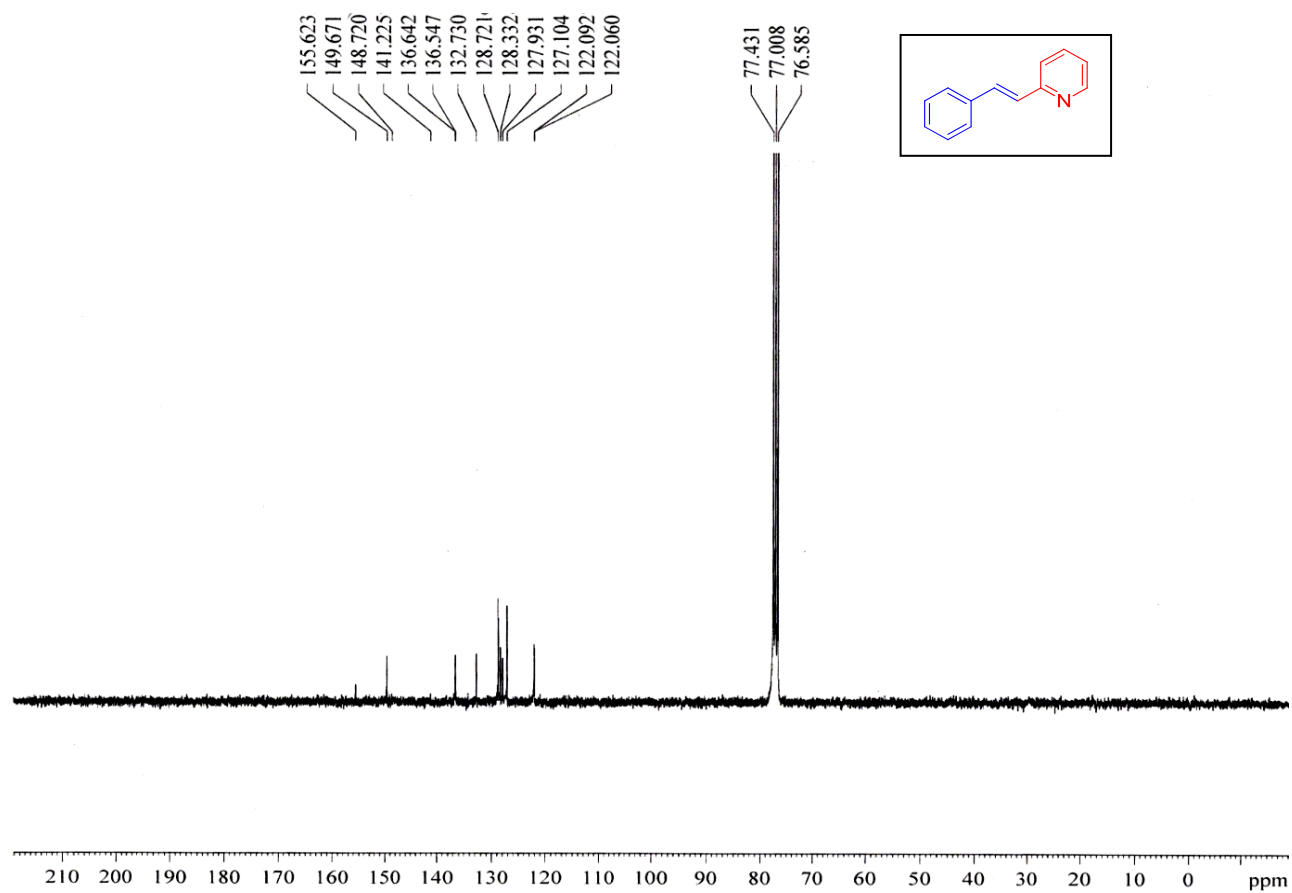

Spectrum 43. 75 MHz  $^{13}\text{C}$  NMR of compound **3j**

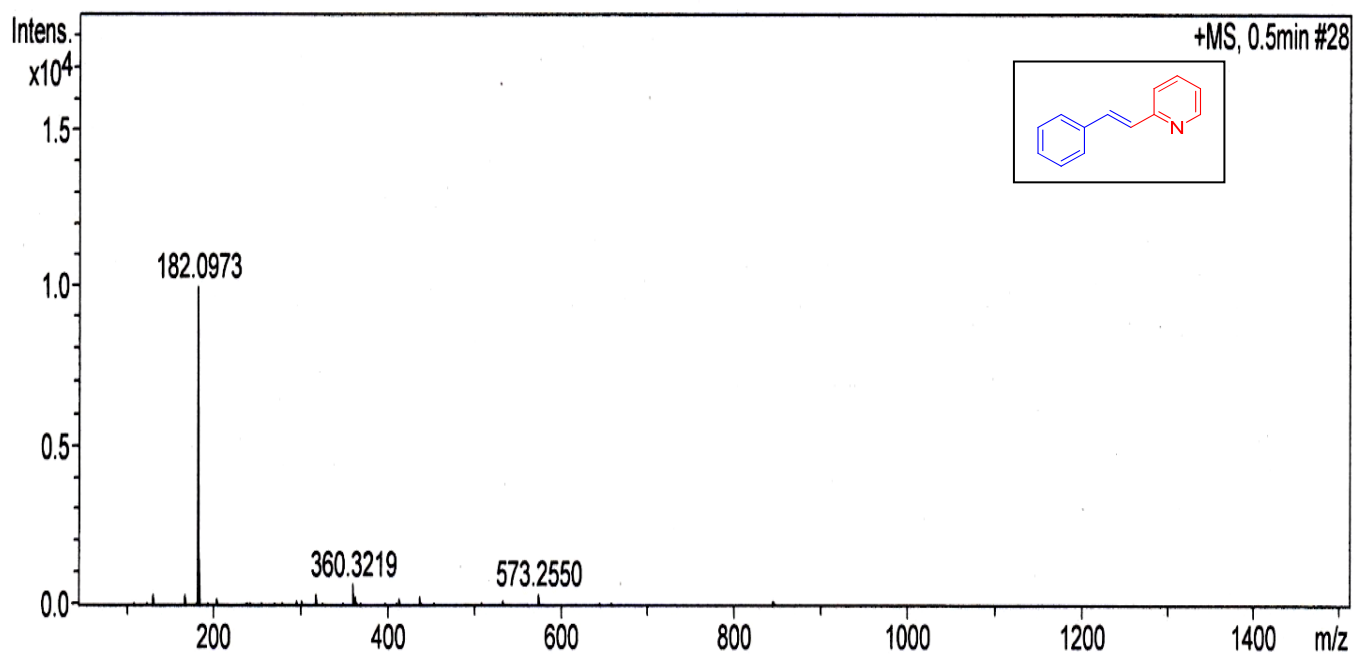

| Meas. m/z | # | Formula                           | Score  | m/z      | err [ppm] | Mean err [ppm] | mSigma | rdb | e <sup>-</sup> Conf | N-Rule |
|-----------|---|-----------------------------------|--------|----------|-----------|----------------|--------|-----|---------------------|--------|
| 182.0973  | 1 | C <sub>13</sub> H <sub>12</sub> N | 100.00 | 182.0964 | -4.8      | -4.5           | 12.3   | 8.5 | even                | ok     |

**Spectrum 44.** HRMS-ESI of compound **3j**

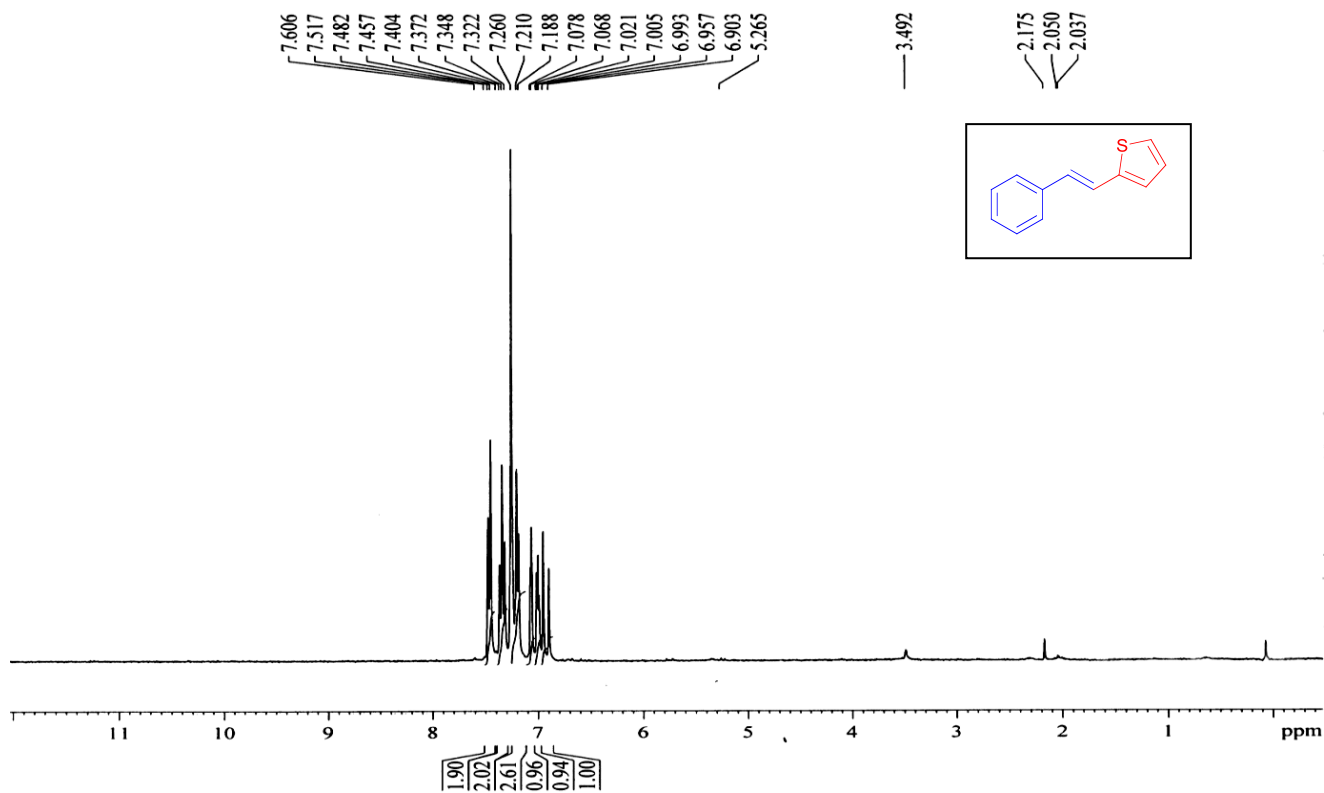

Spectrum 45. 300 MHz  $^1\text{H}$  NMR of compound 3k

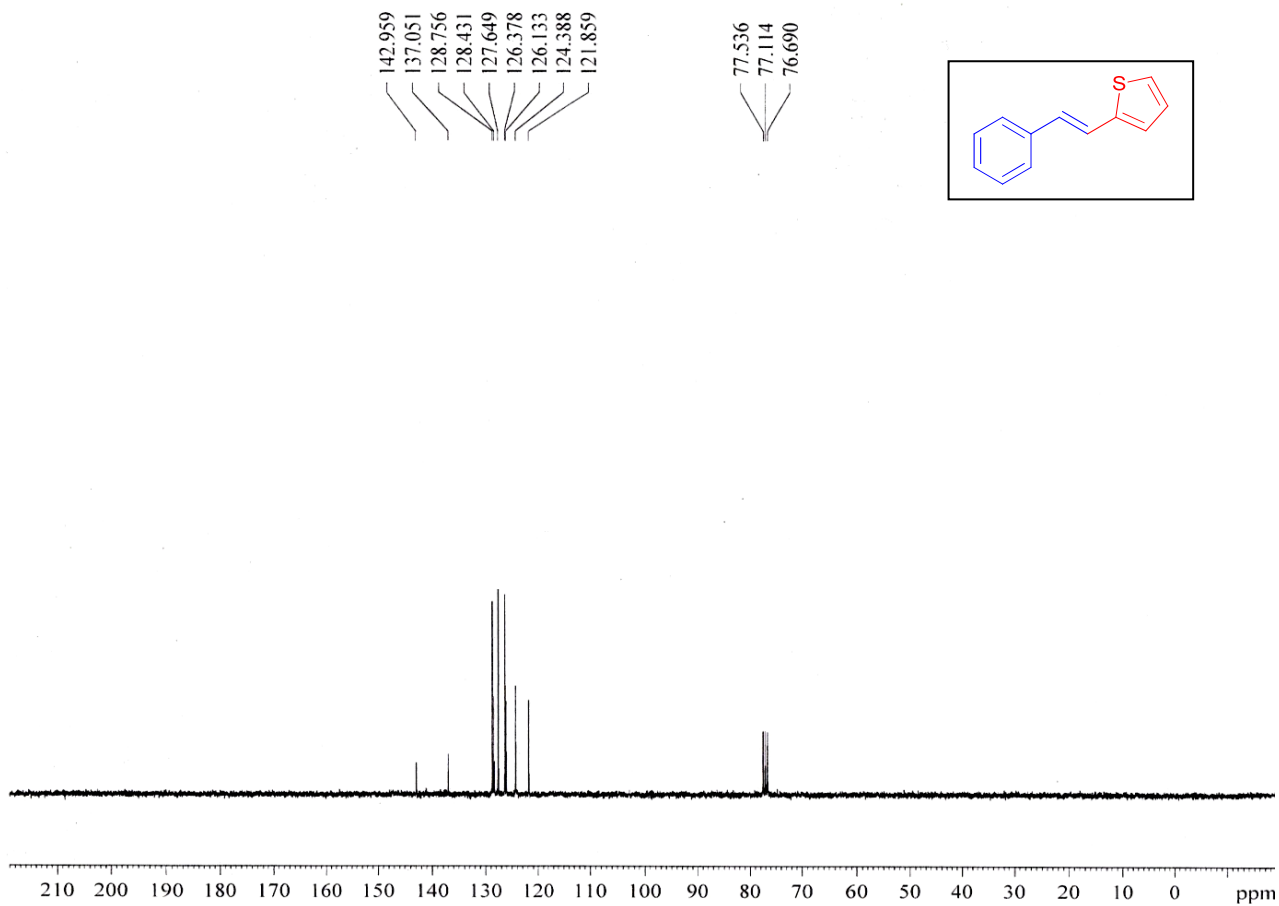

Spectrum 46. 75 MHz  $^{13}\text{C}$  NMR of compound 3k

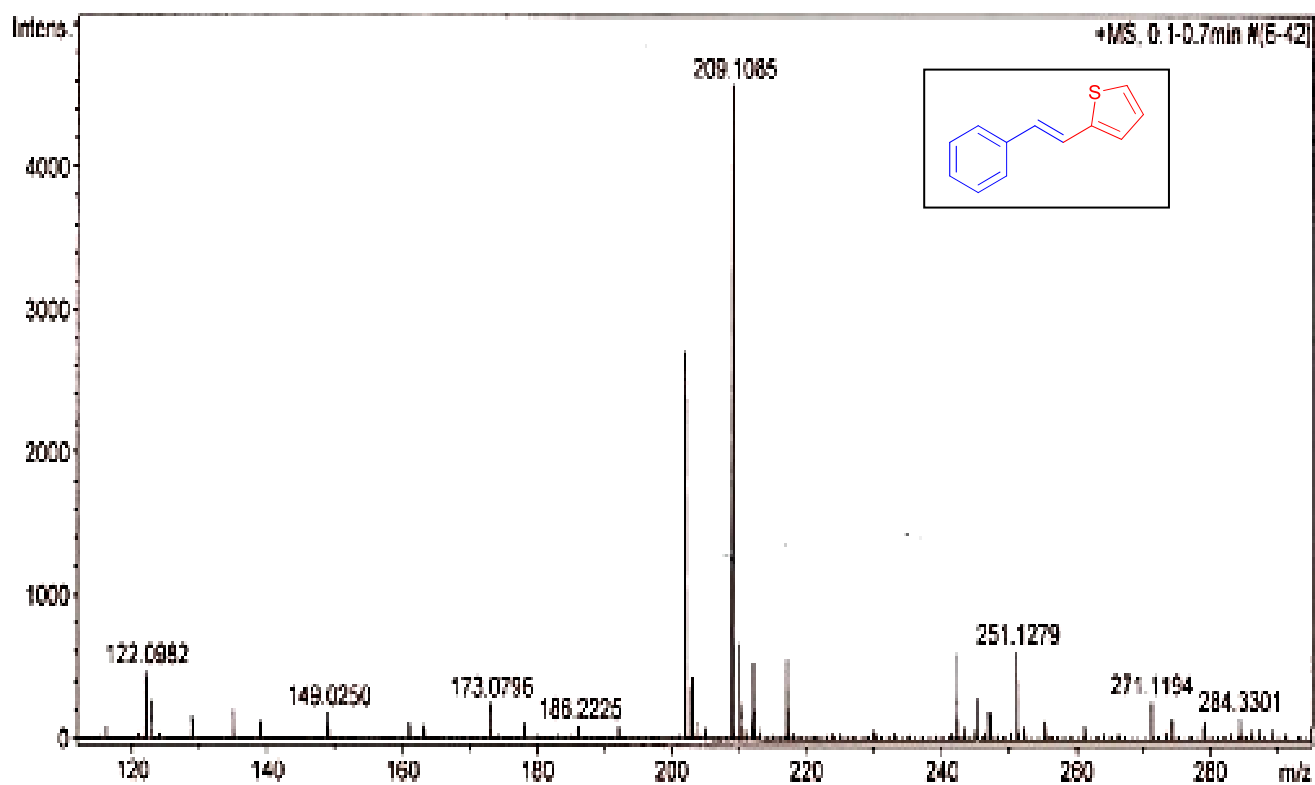

Spectrum 47. HRMS-ESI of compound **3k**

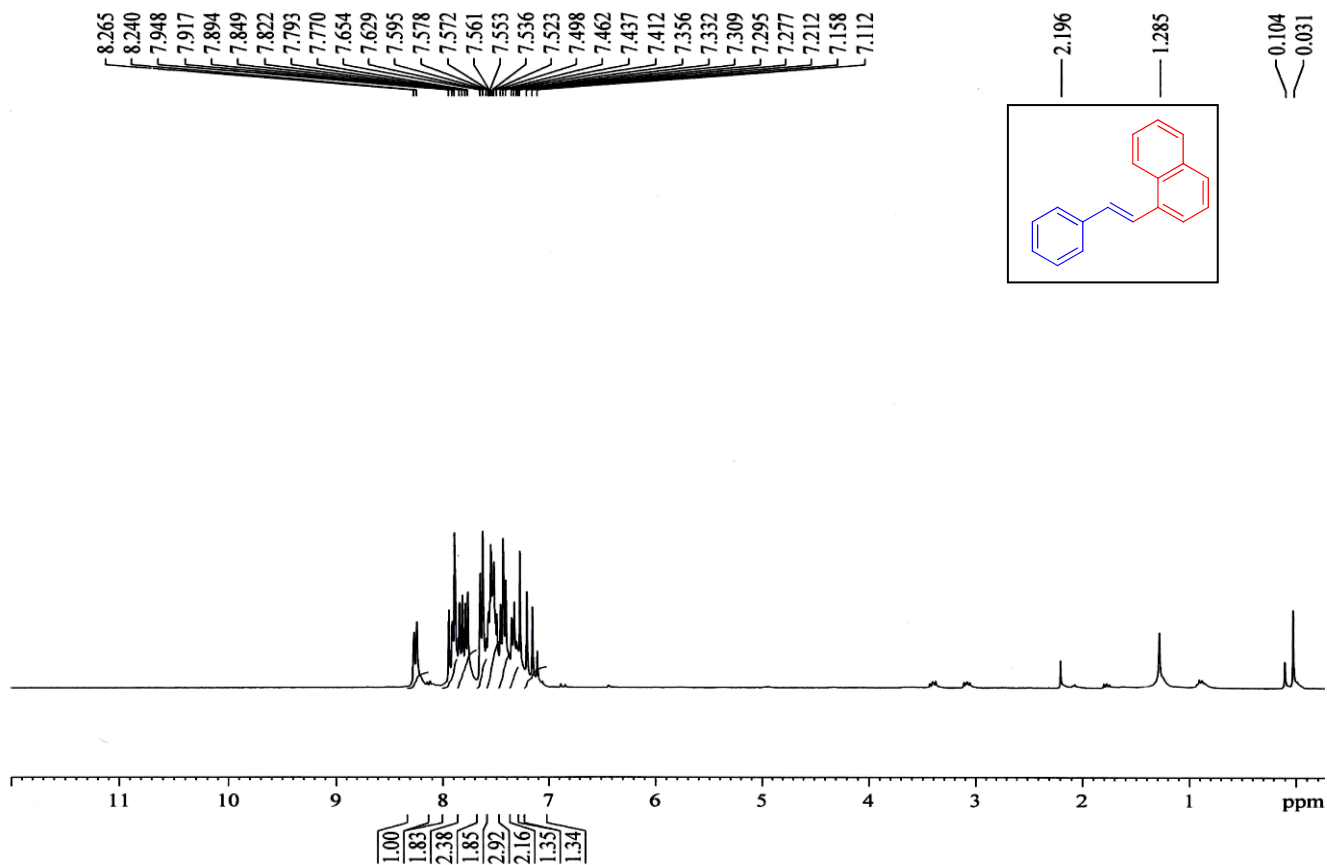

Spectrum 48. 300 MHz  $^1\text{H}$  NMR of compound 31

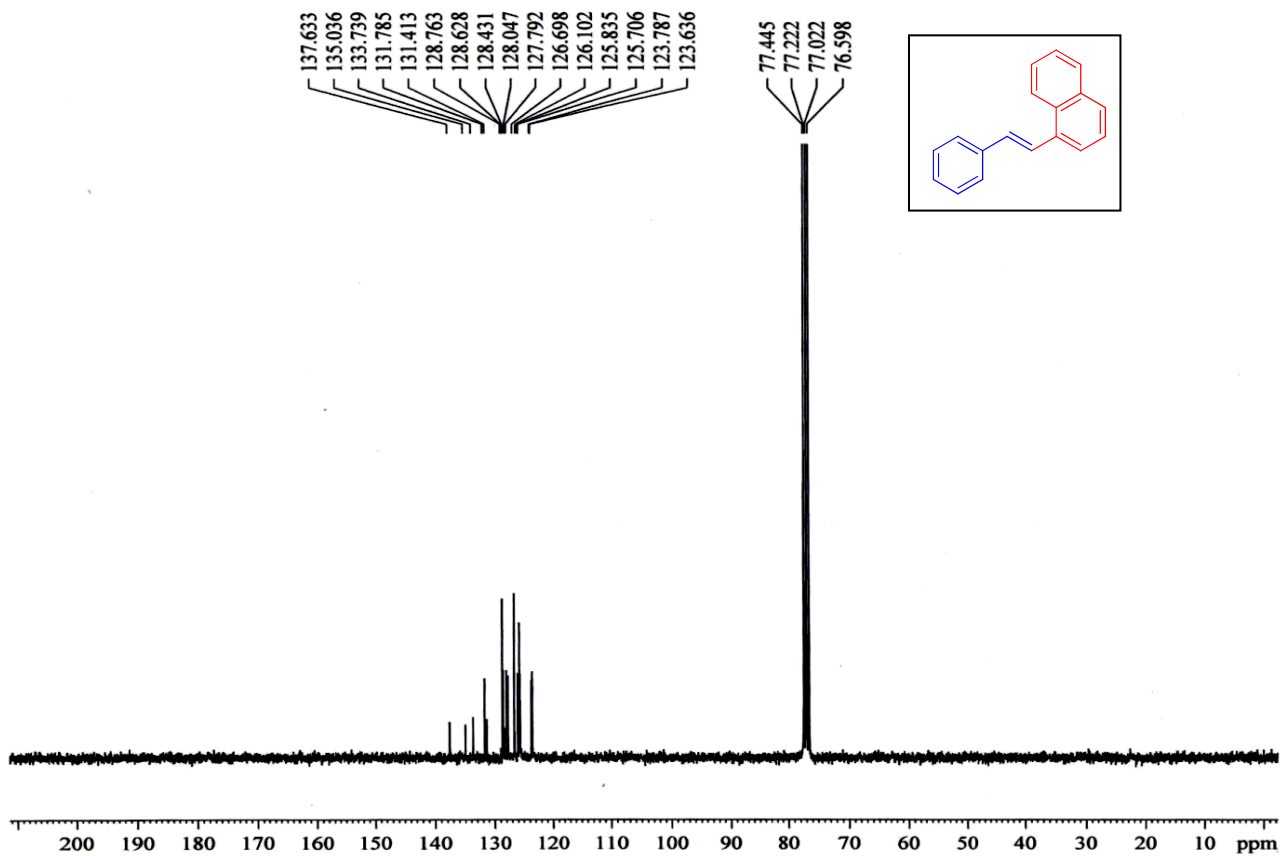

Spectrum 49. 75 MHz  $^{13}\text{C}$  NMR of compound 31



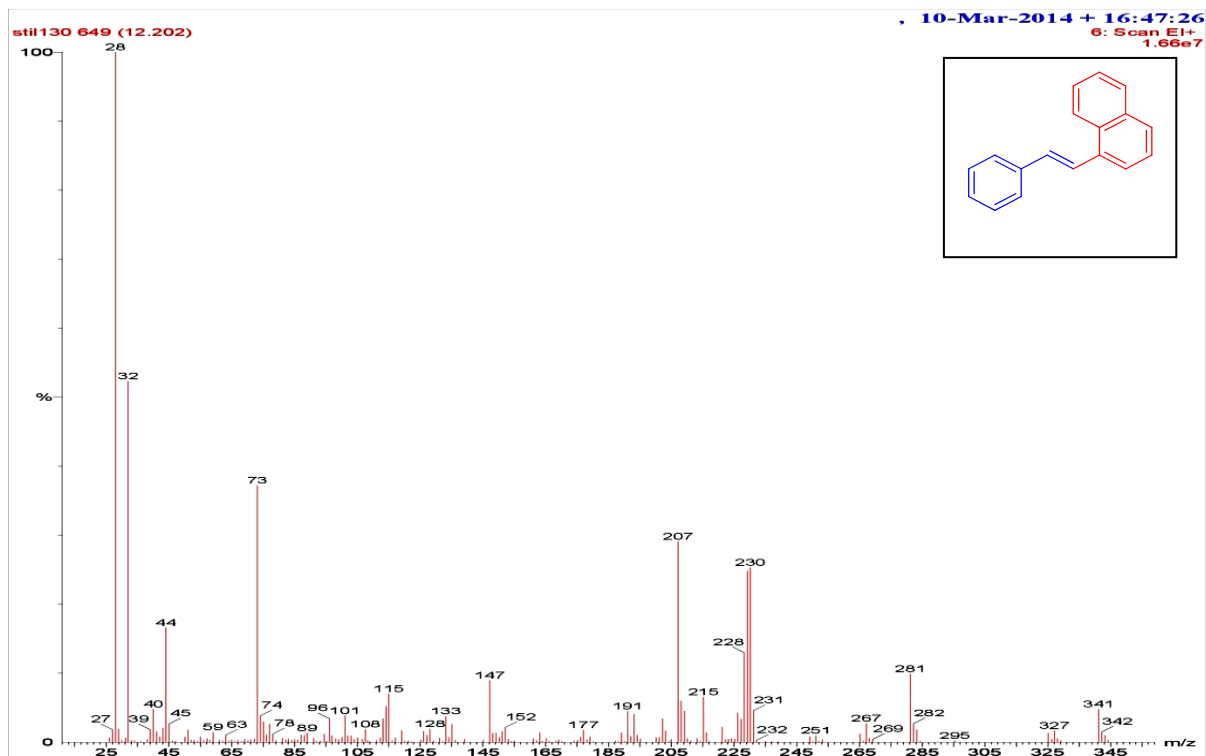

Spectrum 50. EI-MS of compound 31

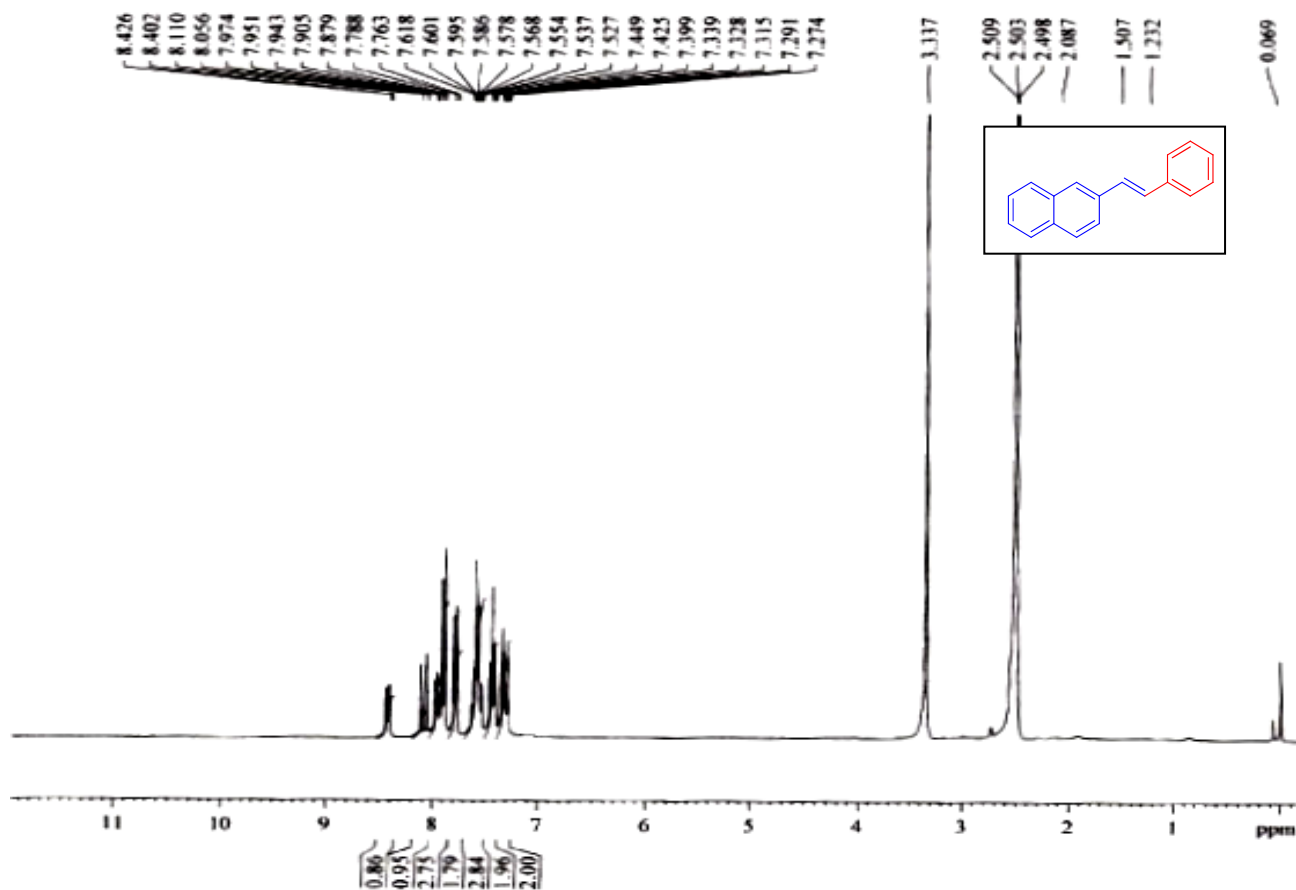

Spectrum 51. 300 MHz  $^1\text{H}$  NMR of compound 3m

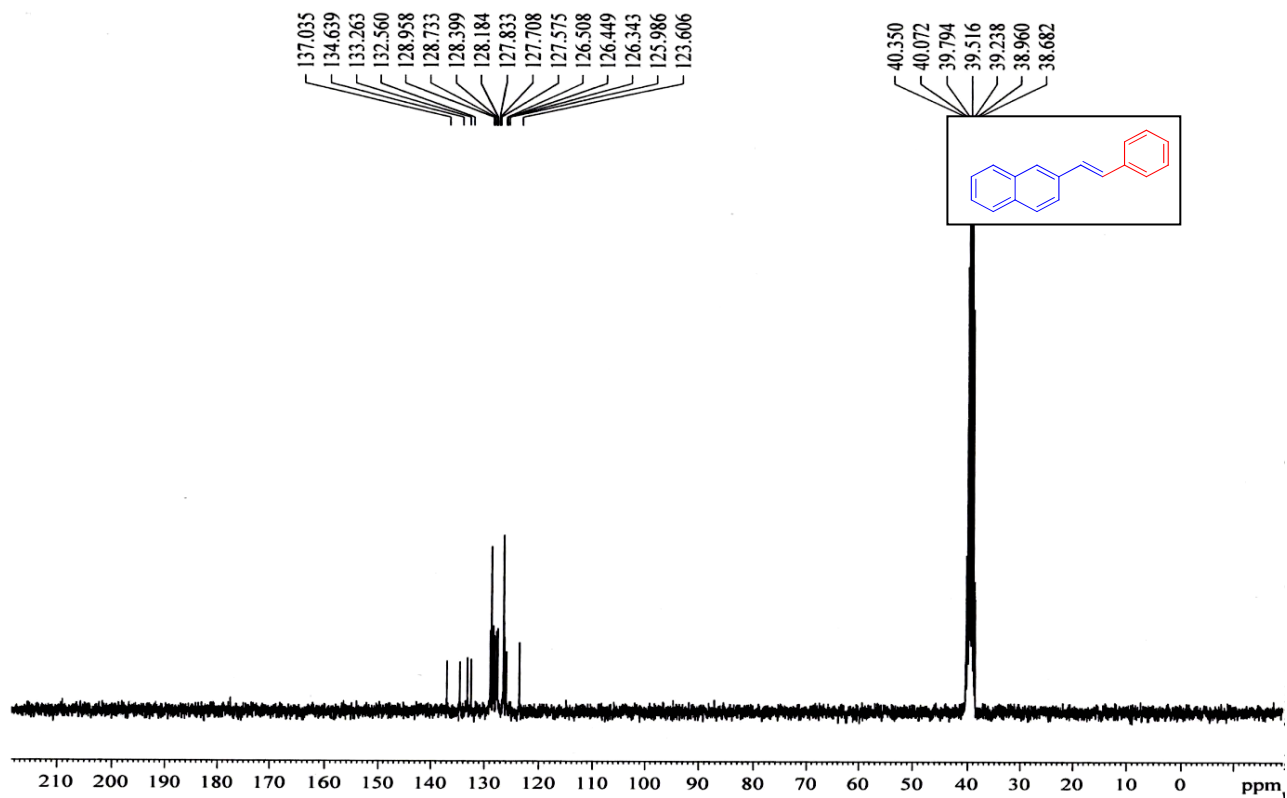

Spectrum 52. 75 MHz  $^{13}\text{C}$  NMR of compound 3m

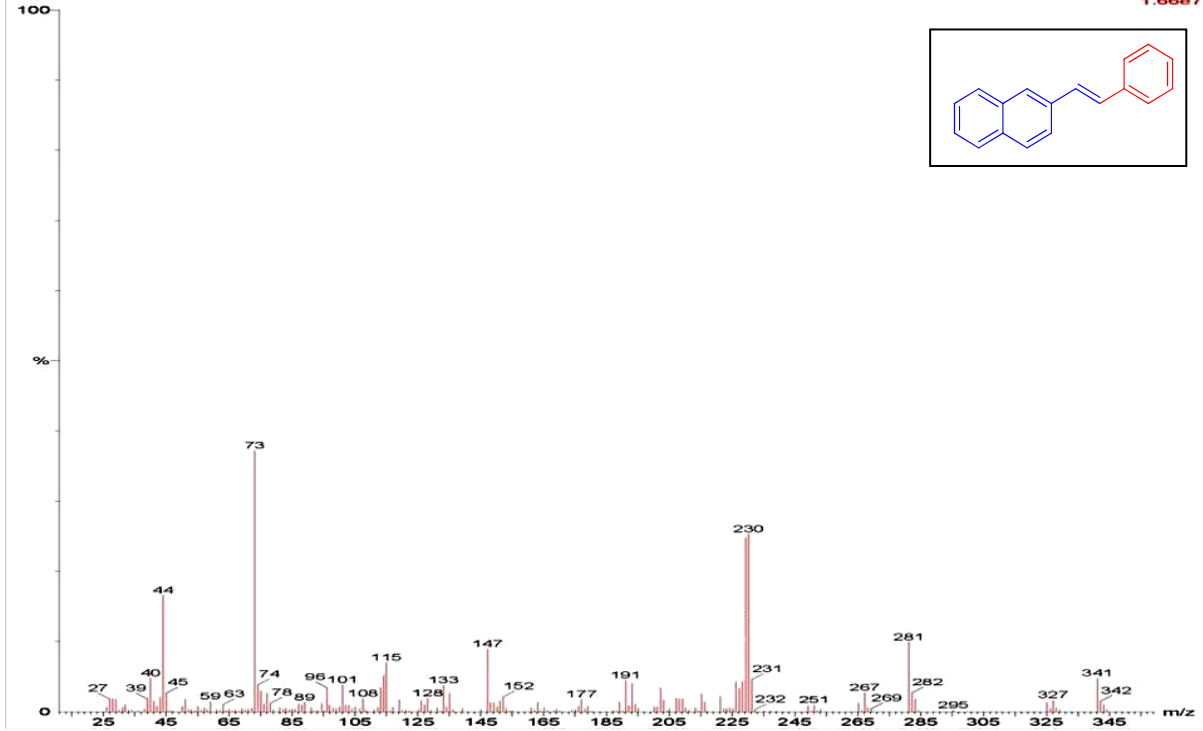

Spectrum 53. EI-MS of compound 3m

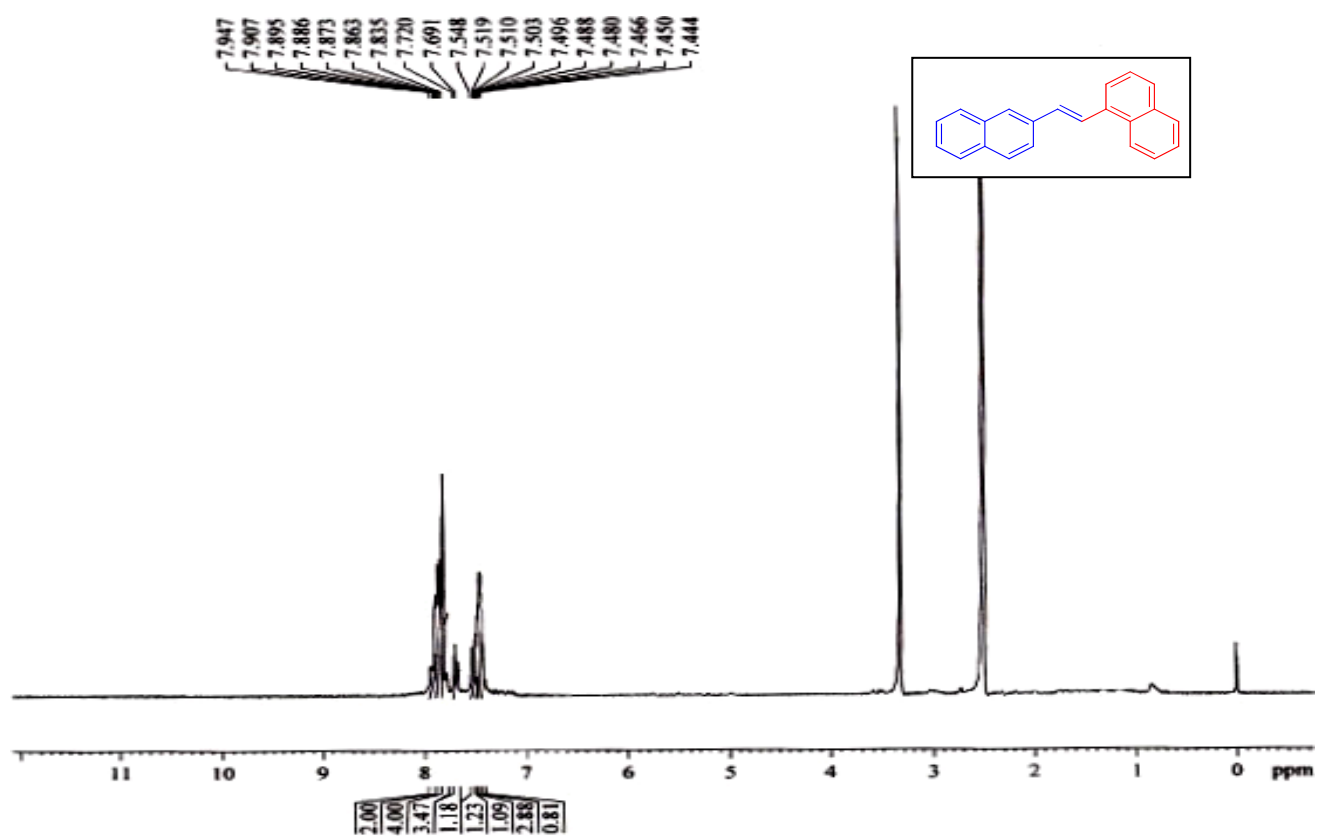

Spectrum 54. 300 MHz <sup>1</sup>H NMR of compound 3n

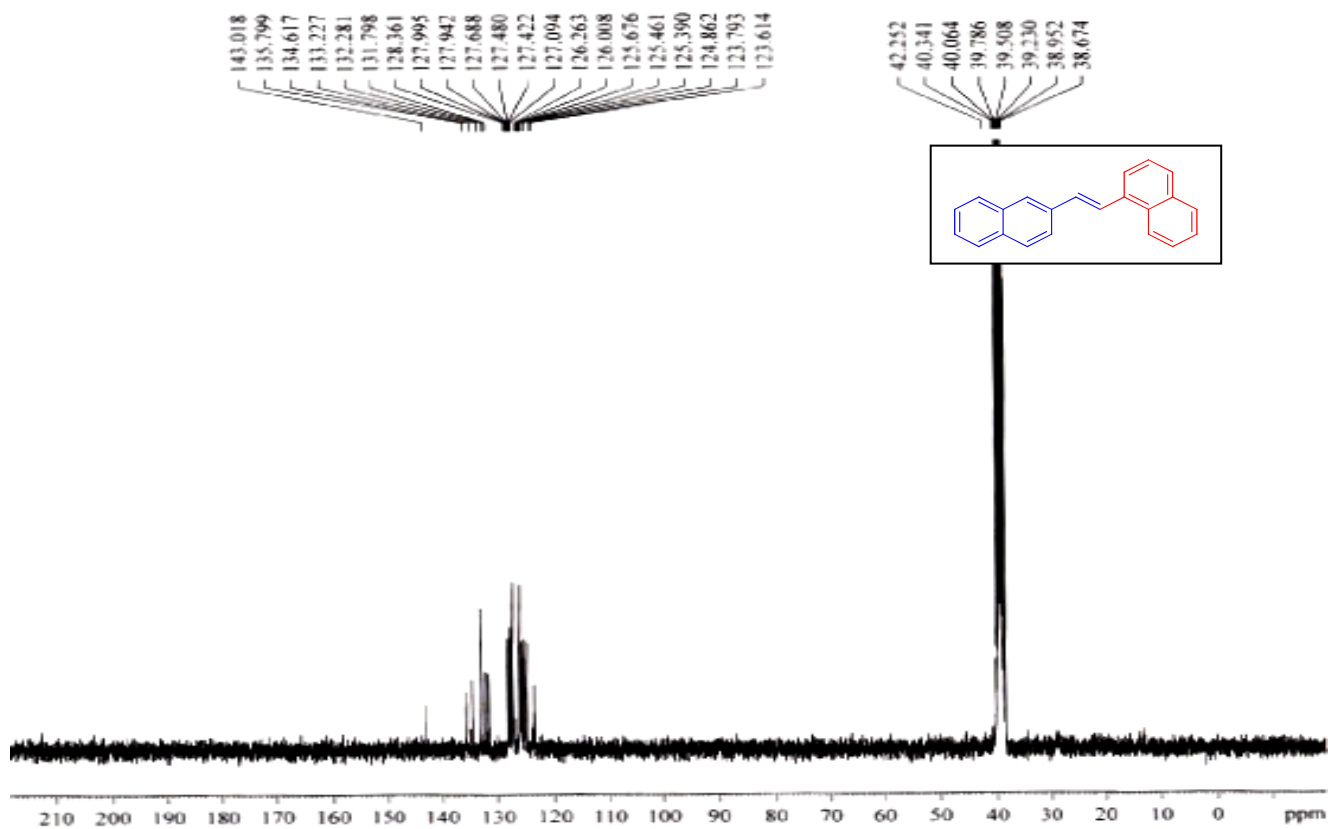

Spectrum 55. 75 MHz <sup>13</sup>C NMR of compound 3n

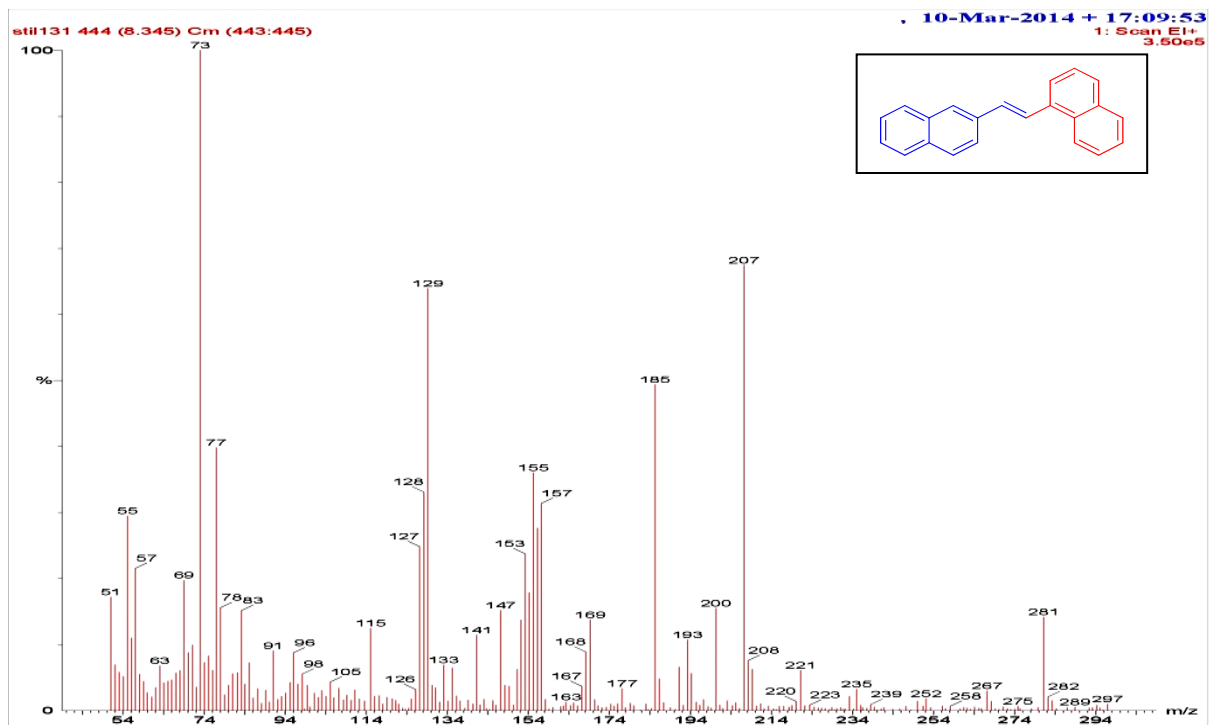

Spectrum 56. EI-MS of compound 3n

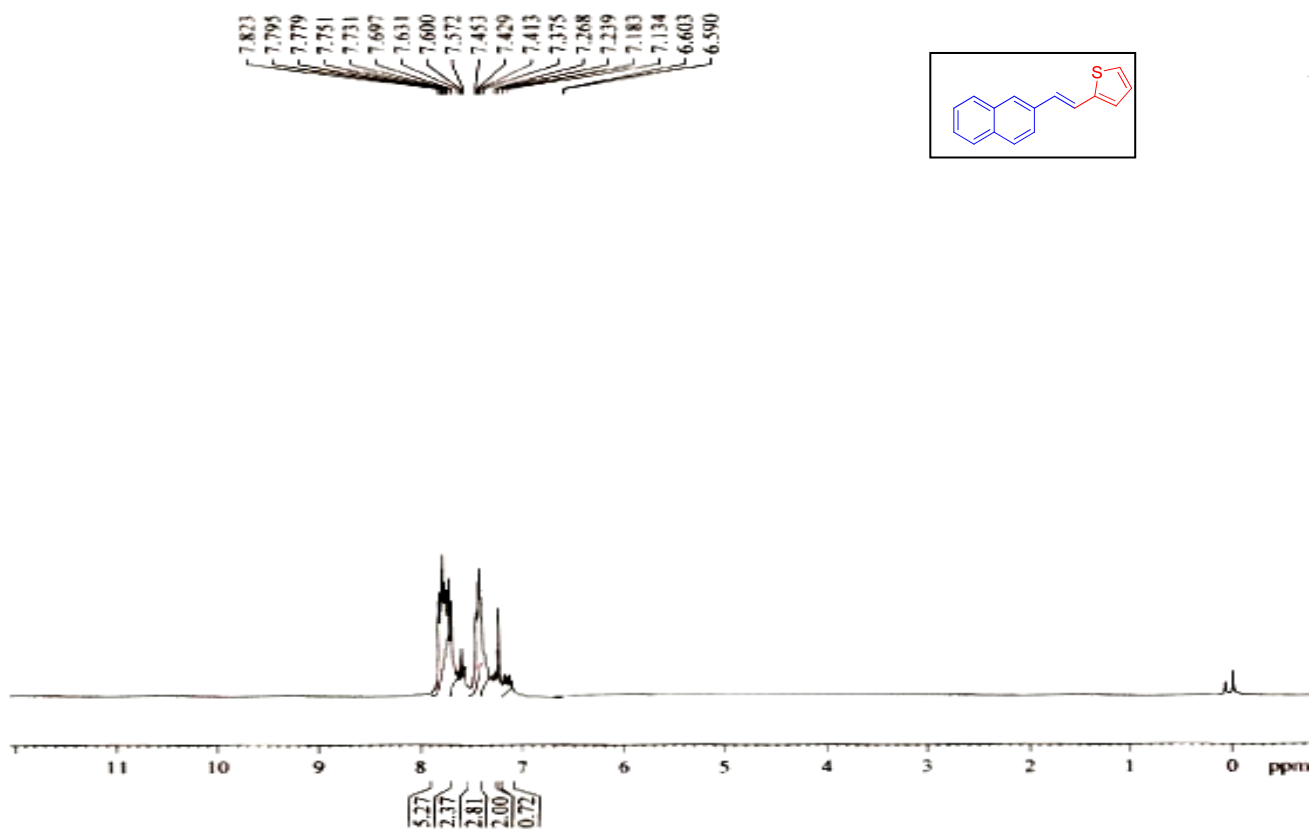

Spectrum 57. 300 MHz  $^1\text{H}$  NMR of compound 3o

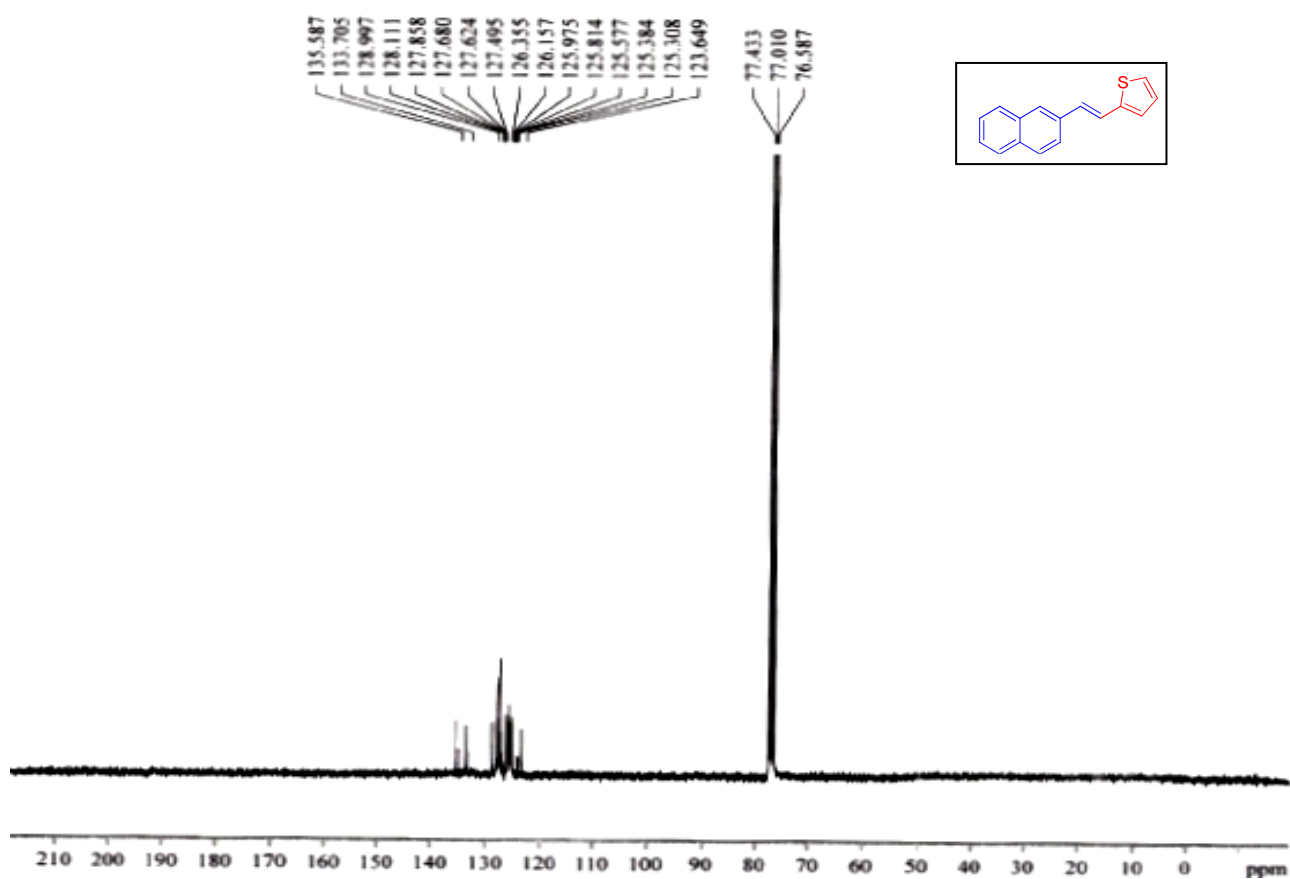

Spectrum 58. 75 MHz  $^{13}\text{C}$  NMR of compound 3o

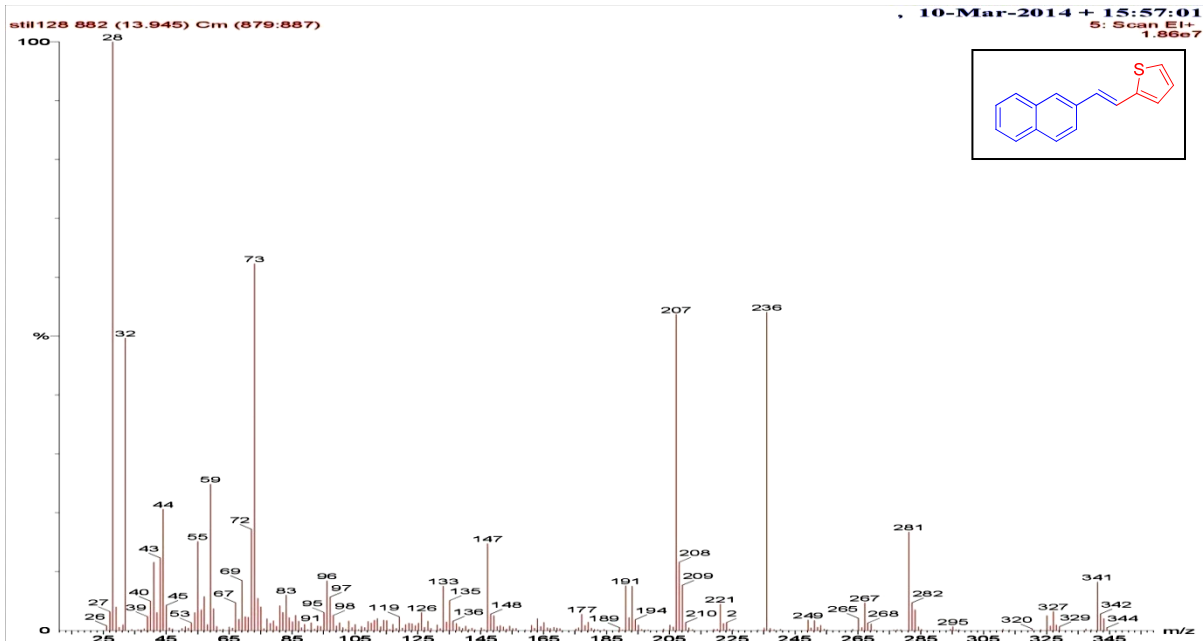

Spectrum 59. EI-MS of compound 3o

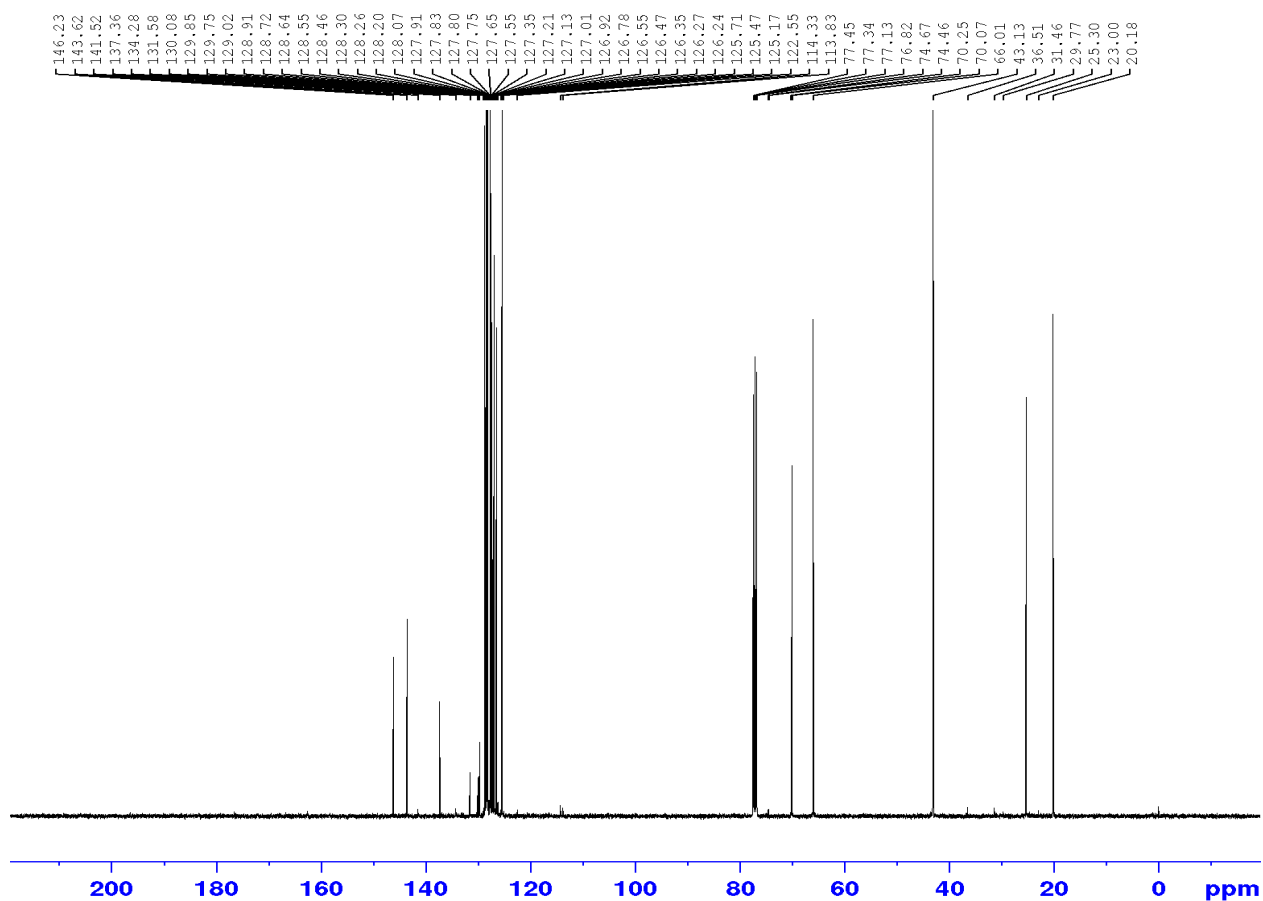

Spectrum 60.  $^{13}\text{C}$  NMR of reaction mixture at 10 minutes

### 3. HPLC data

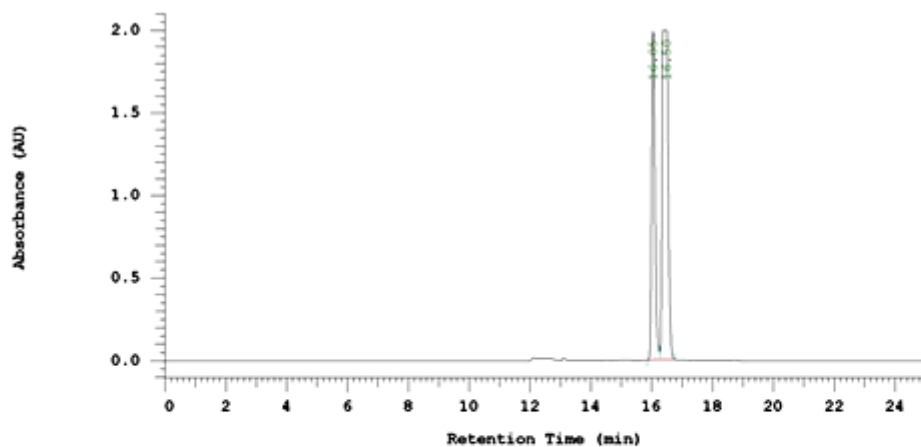

Chrom Type: Best Chromatogram

Peak Quantitation: AREA  
Calculation Method: AREA%

| No. | RT    | Area     | Area %  |
|-----|-------|----------|---------|
| 1   | 16.05 | 7432921  | 35.282  |
| 2   | 16.50 | 13634484 | 64.718  |
|     |       | 21067405 | 100.000 |

Figure S1: HPLC profile showing percentage conversion of styrene to 1-(bromoethyl)benzene (1a).



#### 4. UV-visible Spectrum

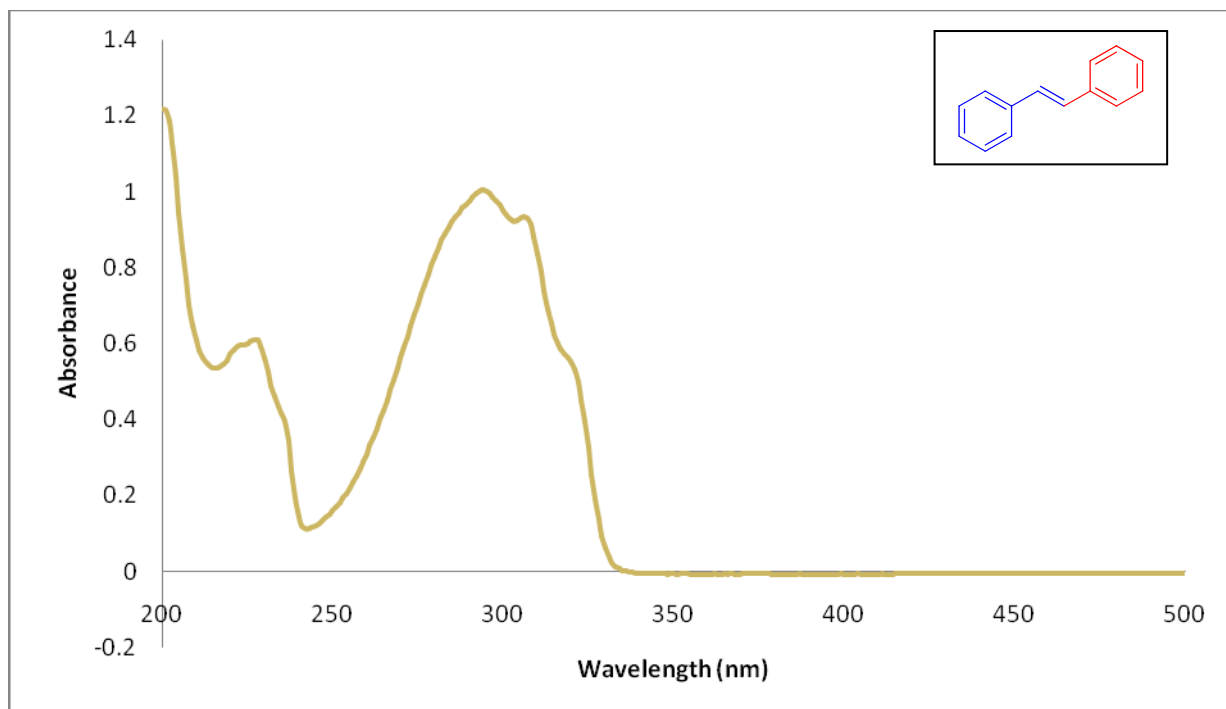

Figure S2: UV-visible spectrum of compound 3a.

#### 5. DLS data

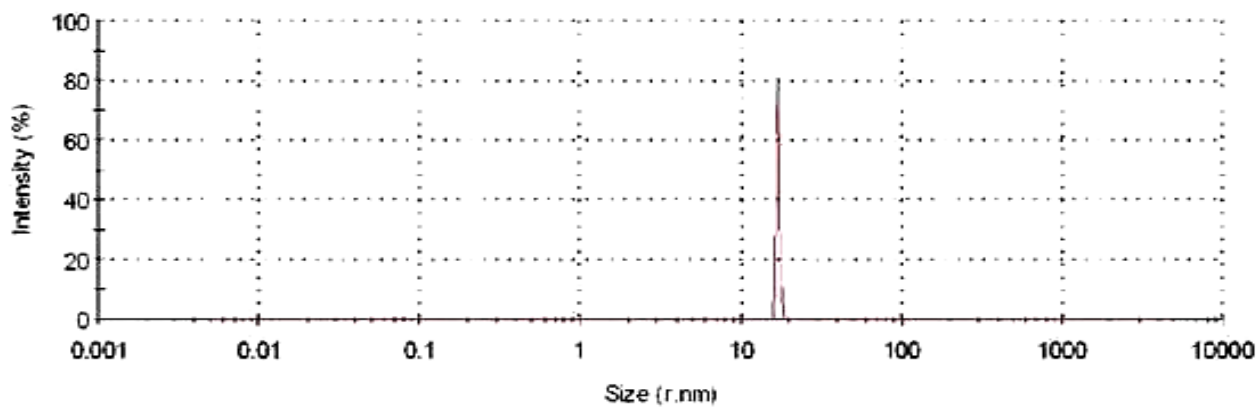

Figure S3: DLS of Pd catalyst during reaction (50 min in MW)

## 6. COSY45 spectrum

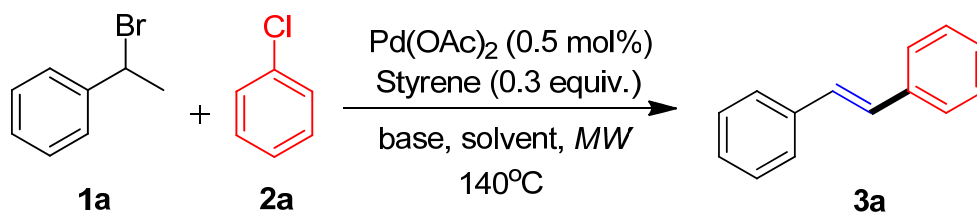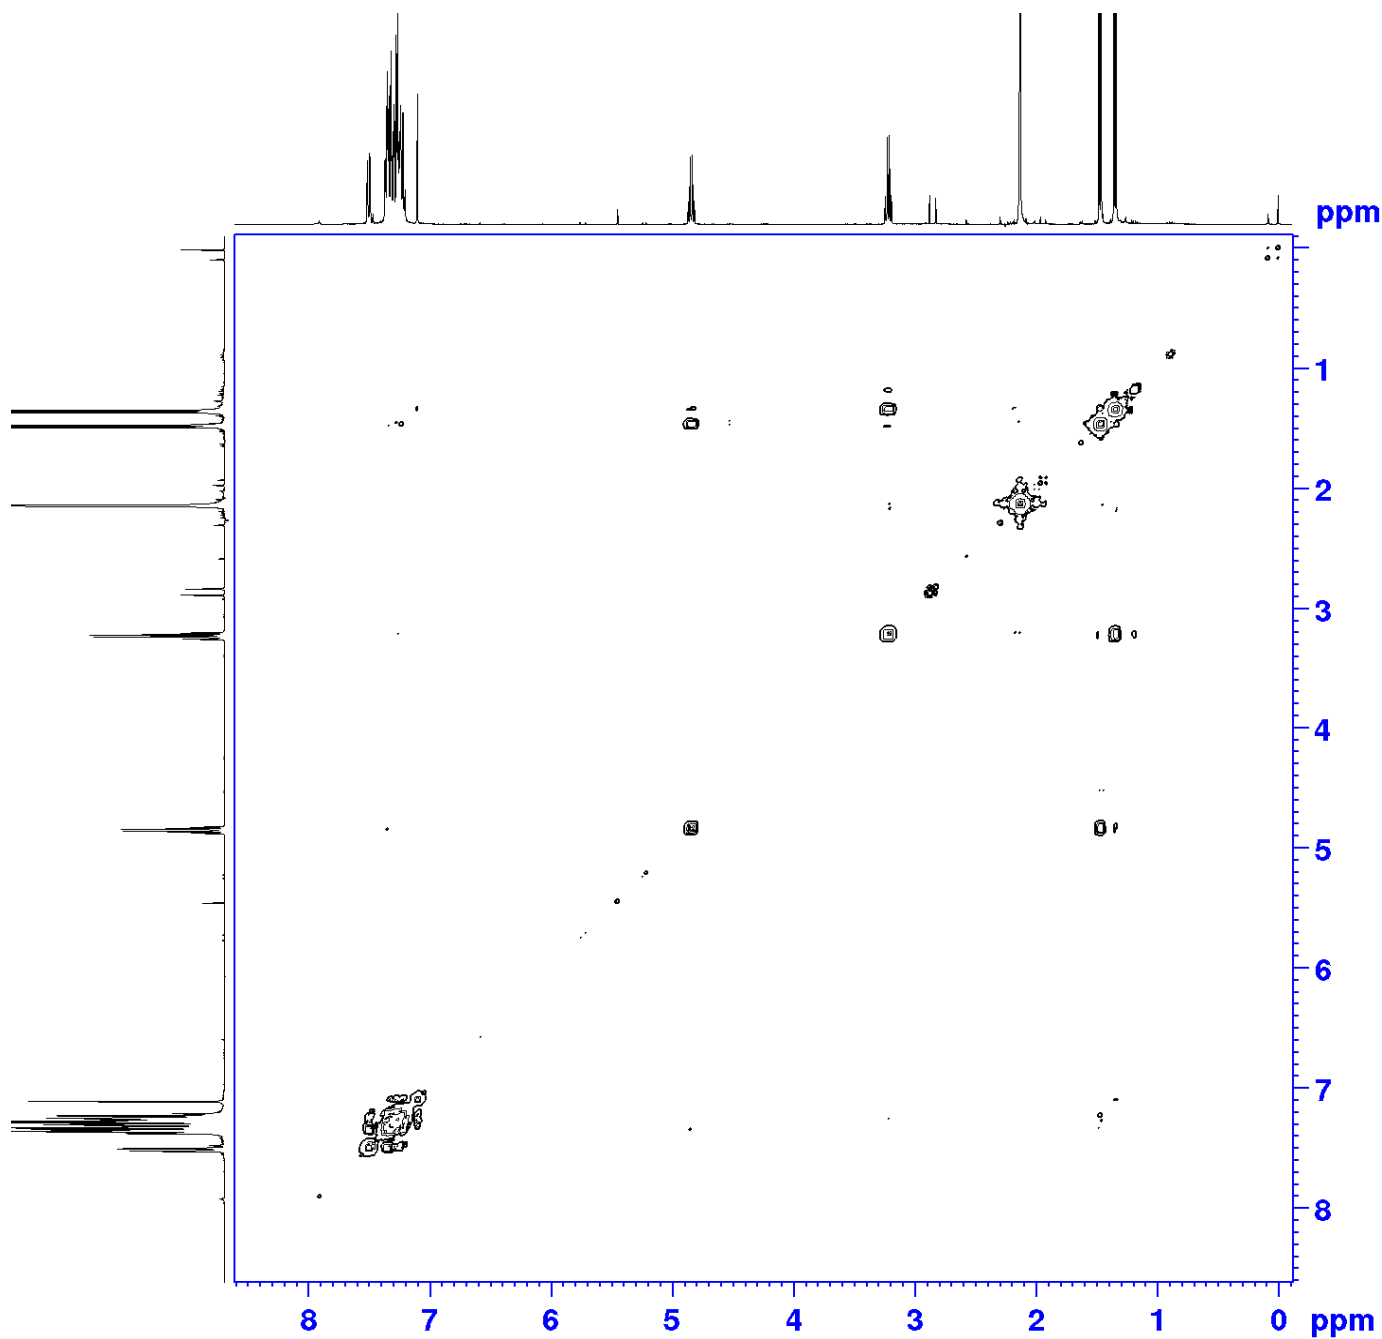

Figure S4: COSY45 of reaction mixture at 10 min

## 7. DEPT 90 spectra

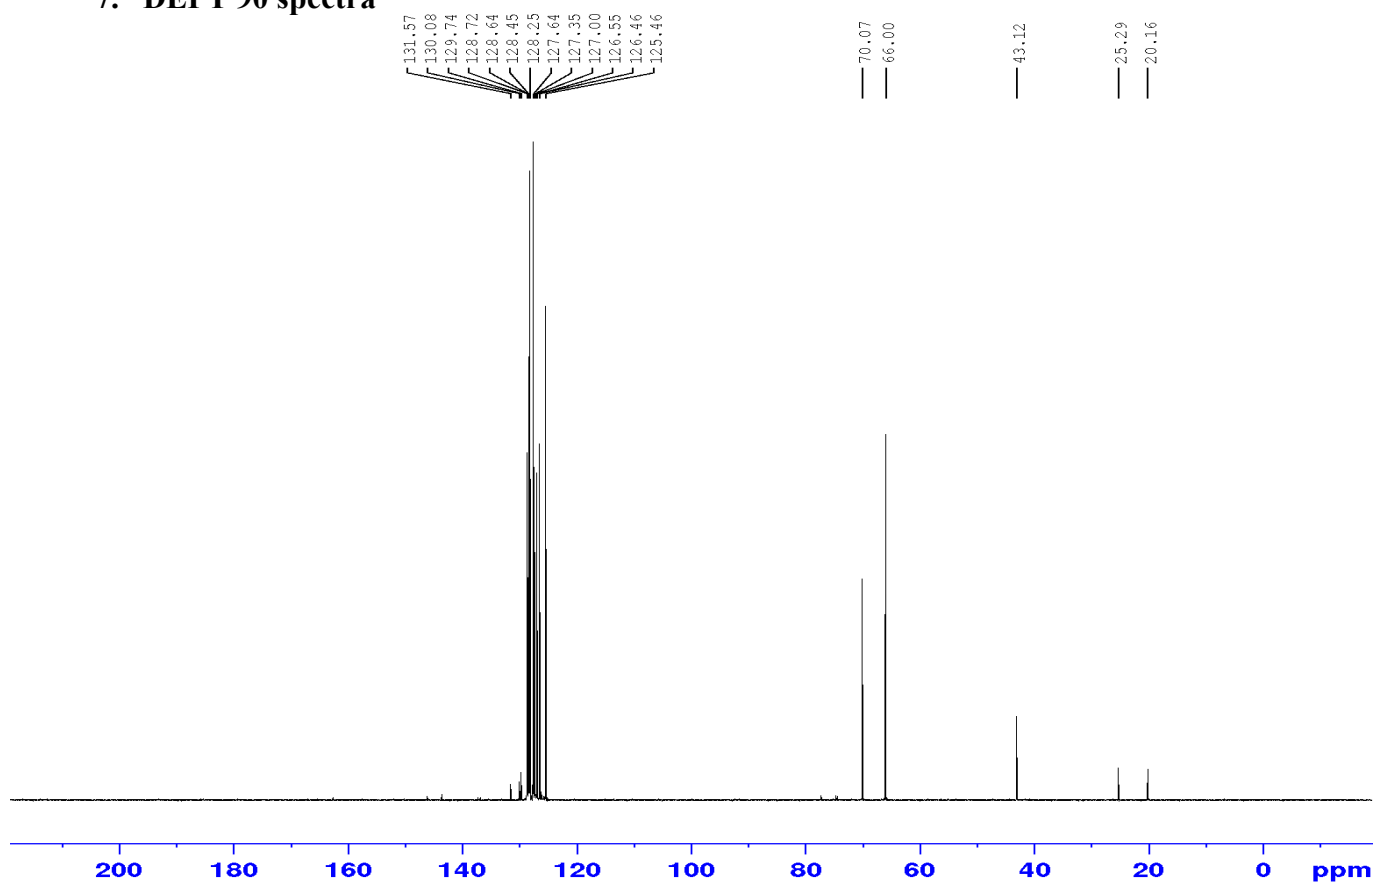

Figure S5: DEPT 90 of reaction mixture at 10 min

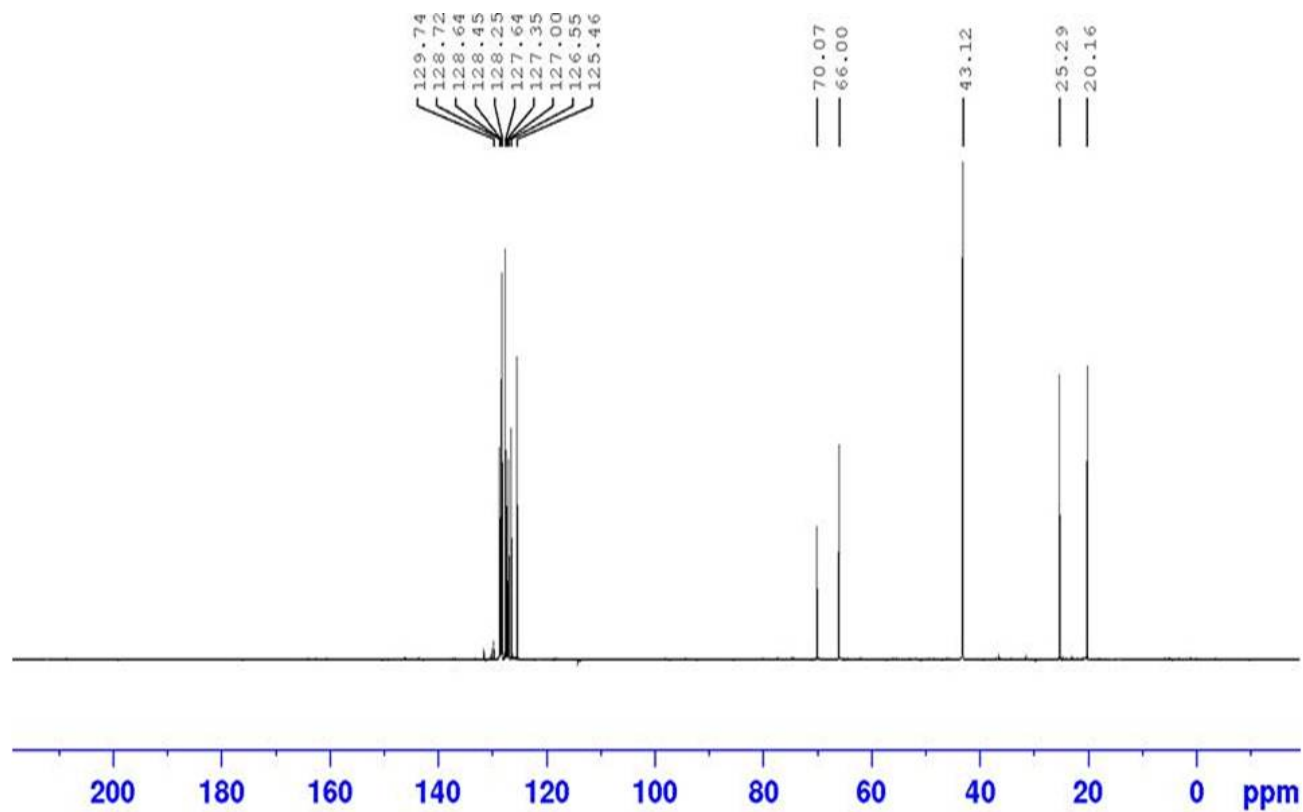

Figure S6: DEPT 135 of reaction mixture at 10 min

## 8. Sequential LC-MS data of the reaction mixture at 1, 5, and 10 minutes

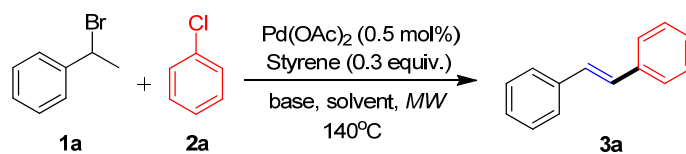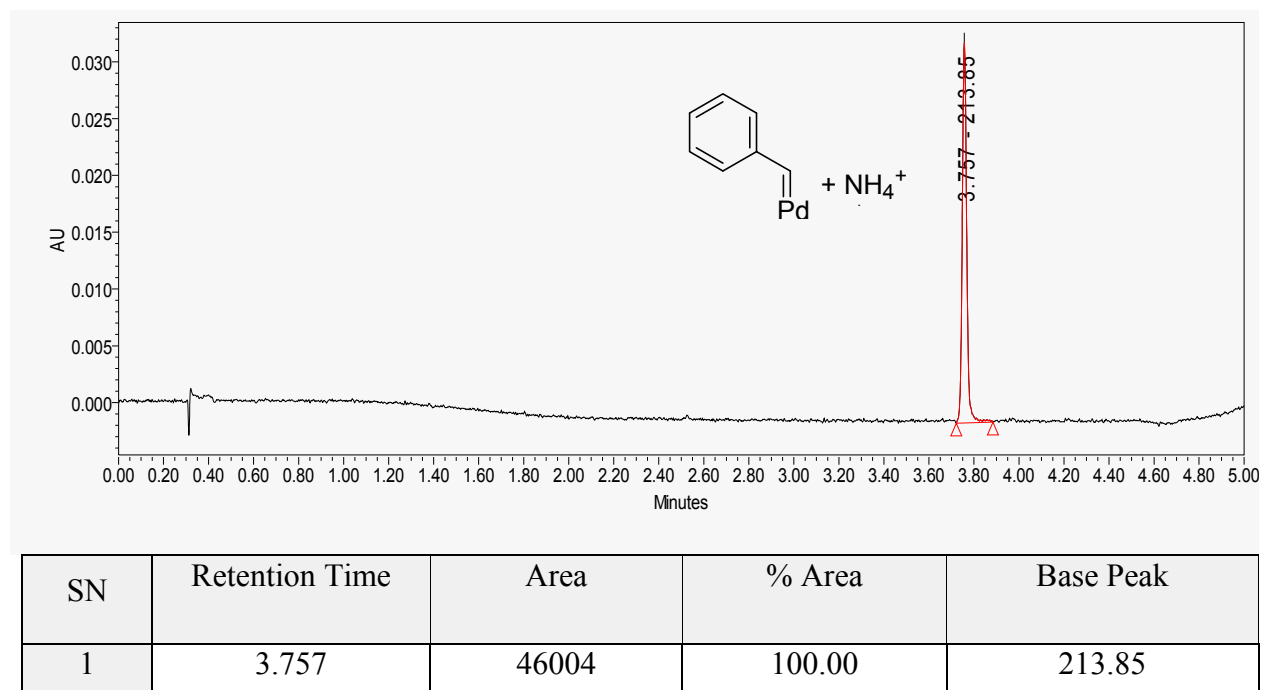

Figure S7: LC-MS data of the reaction mixture at 1 minute

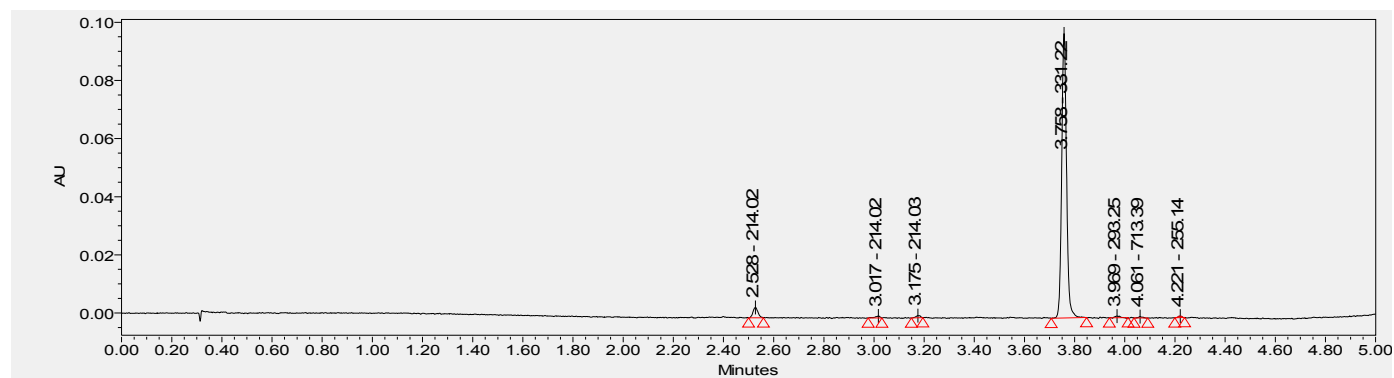

| SN | Retention Time | Area   | % Area | Base Peak |
|----|----------------|--------|--------|-----------|
| 1  | 2.528          | 4875   | 3.47   | 214.02    |
| 2  | 3.017          | 968    | 0.69   | 214.02    |
| 3  | 3.175          | 916    | 0.65   | 214.03    |
| 4  | 3.758          | 131788 | 93.80  | 331.22    |
| 5  | 3.969          | 914    | 0.65   | 293.25    |
| 6  | 4.061          | 526    | 0.37   | 713.39    |
| 7  | 4.221          | 507    | 0.36   | 255.14    |

Figure S8: LC-MS data of the reaction mixture at 5 minute

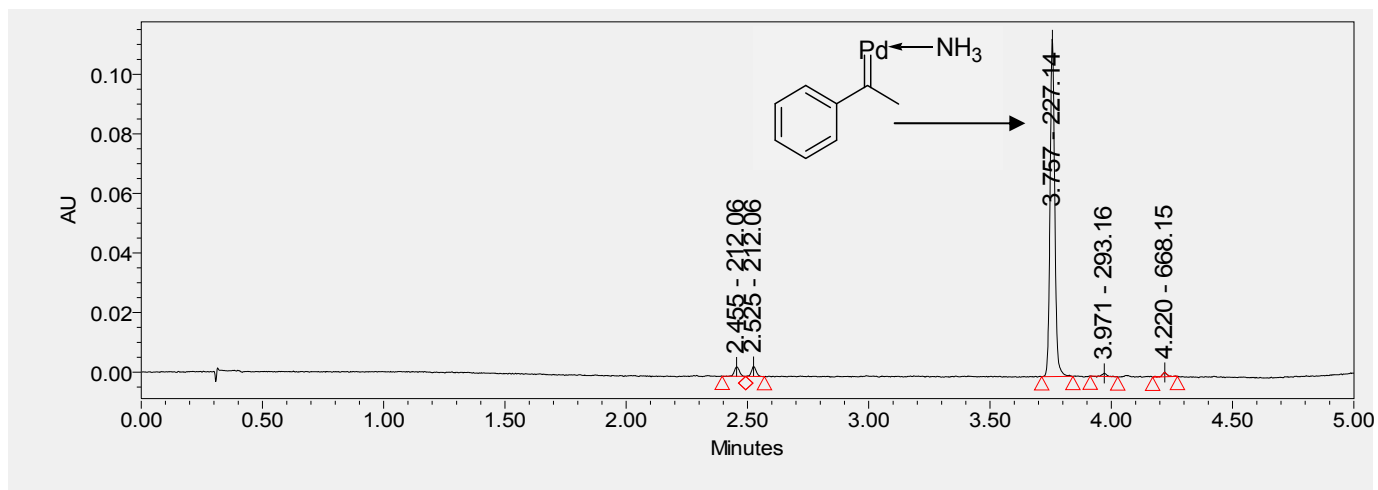

|   | Retention Time | Area   | % Area | Base Peak |
|---|----------------|--------|--------|-----------|
| 1 | 2.455          | 4633   | 2.80   | 212.06    |
| 2 | 2.525          | 4598   | 2.78   | 212.06    |
| 3 | 3.757          | 152531 | 92.24  | 227.14    |
| 4 | 3.971          | 1619   | 0.98   | 293.16    |
| 5 | 4.220          | 1973   | 1.19   | 668.15    |

**Figure S9: LC-MS of the reaction mixture at 10 minute**

## 9. EDAX of reaction mixture after 5 minutes

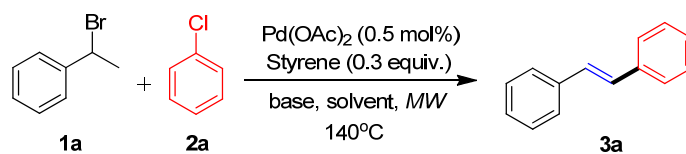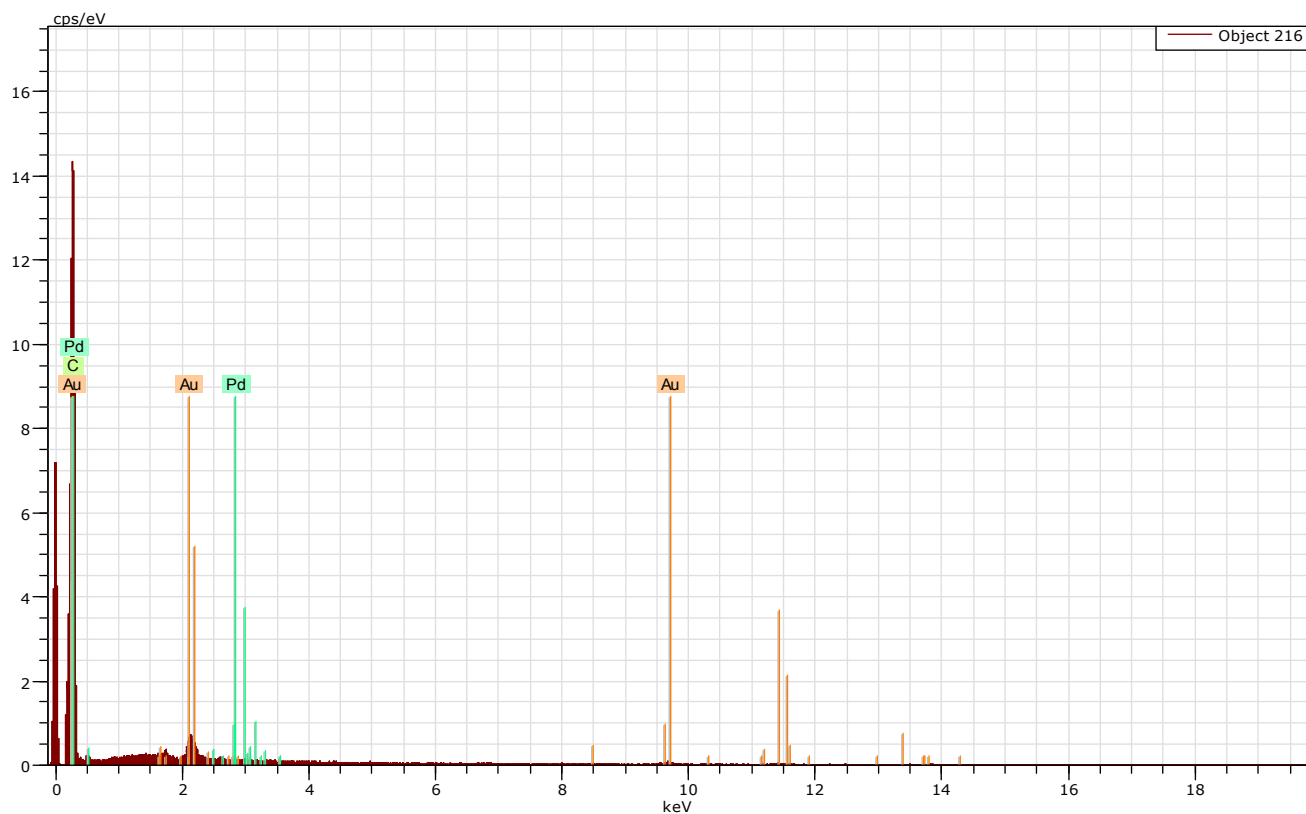

| AN Series      | unn. C [wt.%] | norm.C [wt.%] | Atom. C [at.%] | Error [%] |
|----------------|---------------|---------------|----------------|-----------|
| Au 79 L-series | 53.83         | 56.30         | 8.24           | 3.9       |
| C 6 K-series   | 35.90         | 37.55         | 90.10          | 62.2      |
| Pd 46 L-series | 5.89          | 6.15          | 1.67           | 0.5       |
| Total          | 95.62         | 100.00        | 100.00         | ---       |

Figure S10: EDAX of reaction mixture after 5 minutes

## 10. Single-Crystal X-Ray experimental details:

### Data Collection and Refinement

Single-crystal X-ray data of compounds were collected on Bruker SMART CCD-Diffractometer using graphite monochromated MoK $\alpha$  radiation ( $\lambda = 0.71073 \text{ \AA}$ ). The structures were solved by the direct method and then refined on  $F^2$  by the full matrix least-squares technique with the SHELX-97 set of software<sup>11</sup> using the WinGX (version 1.80.05) program package.<sup>12</sup> All non-hydrogen atoms were refined anisotropically and hydrogen atoms were treated as riding atoms using SHELX default parameters. Further information on the crystal structure determination (excluding structure factors) has been given as table S1 and also deposited in the Cambridge Crystallographic Data Centre as supplementary publications no. **1028616**. Copies of the data can be obtained free of charge upon application to CCDC, 12 Union Road, Cambridge CB2 1EZ, UK (fax: (+44) 1223-336-033. e-mail: deposit@ccdc.cam.ac.uk) or via internet.

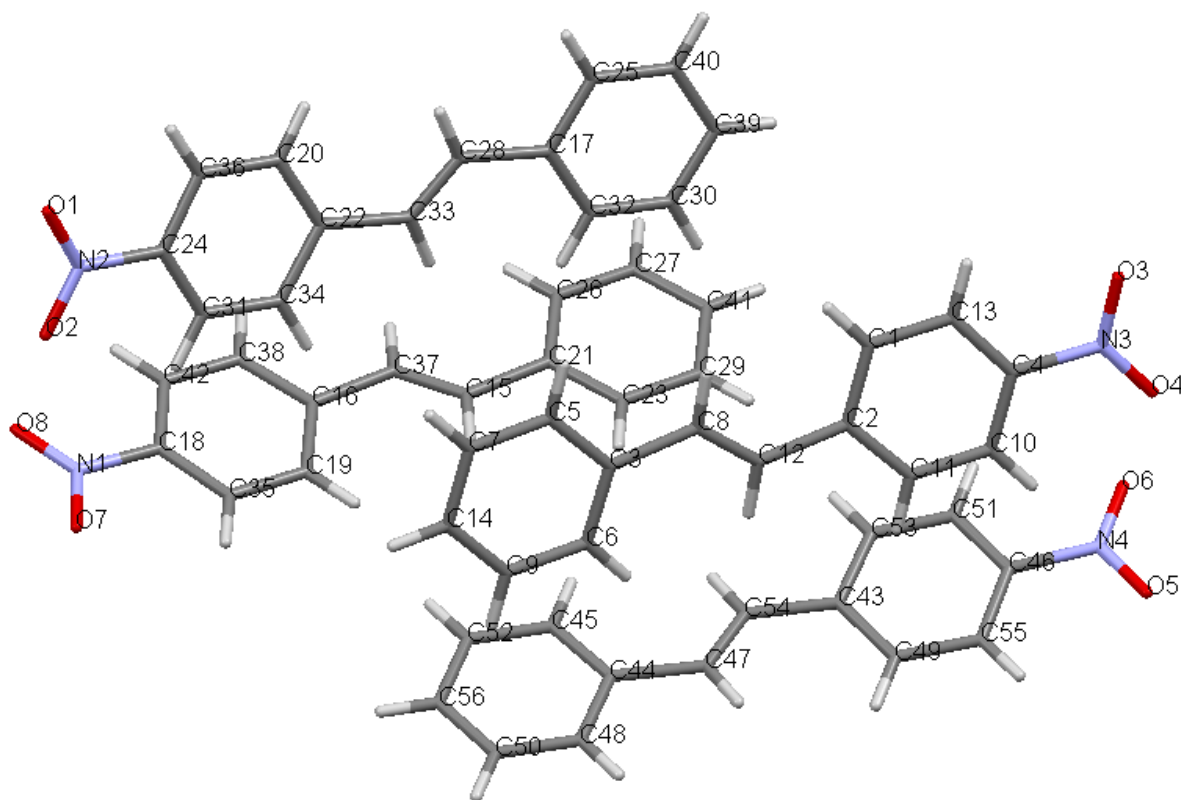

**Figure S11.** Single crystal X-ray structure of compound **3c** shown in capped stick model.

**Table S1.** Crystallographic refinement data for compound **3c**

| <b>Property</b>                                   | <b>Data 3c</b>         |
|---------------------------------------------------|------------------------|
| Empirical Formula                                 | C14 H11 N O2           |
| Formula Weight                                    | 225.24                 |
| Crystal System                                    | Monoclinic             |
| Space group                                       | P -1                   |
| <i>a</i> (Å)                                      | 7.890(3)               |
| <i>b</i> (Å)                                      | 10.185(4)              |
| <i>c</i> (Å)                                      | 28.422(9)              |
| $\alpha, \beta, \gamma$ (°)                       | 90, 90, 90             |
| <i>V</i> (Å <sup>3</sup> )                        | 2284.0(14)             |
| <i>Z</i>                                          | 8                      |
| Density (calc)                                    | 1.310                  |
| F(000)                                            | 944.0                  |
| $\mu$ (mm <sup>-1</sup> )                         | 0.088                  |
| Crystal Size [mm]                                 | 0.24 x 0.17 x 0.15     |
| Temperature (K)                                   | 273(2)                 |
| Radiation / $\lambda$                             | MoK $\alpha$ / 0.71073 |
| $\theta$ Min-Max [°]                              | 0.982,0.987            |
| <i>h, k, l</i>                                    | -9:9; -12:12; -33:33   |
| Tot.,UniqData, R(int)                             | 22049, 8046, 0.099     |
| Obs. data [ <i>I</i> > 2.0 $\sigma$ ( <i>I</i> )] | 2999                   |
| Nref, Npar                                        | 8046, 613              |
| R1, wR2, S                                        | 0.0952, 0.2695, 0.993  |
| Min. - Max. resd. dens. [e/ Å <sup>3</sup> ]      | -0.170, 0.368          |
| <b>CCDC</b>                                       | <b>1028616</b>         |



## 11. Computational details:

To support our mechanistic pathway shown in figure 5 (main text) the density functional theory (DFT)<sup>13</sup> studies with GAUSSIAN 09 program<sup>14</sup> have been performed. Working within the framework of first-principles DFT, the free energies were determined using the B3LYP hybrid functional. The 6-311++G (2d,p) basis set<sup>15</sup> was chosen to describe H, C, O, Cl, and Br atoms and the effective core potential of Hay and Wadt<sup>16</sup> with double- $\zeta$  valence basis set (LANL2DZ) was used for the palladium (Pd). The structure of the molecules was optimized in *N,N*-dimethylformamide-water (DMF-H<sub>2</sub>O) binary solvent *via* direct inversion in iterative subspace (DIIS), as implemented in the GAUSSIAN 09 program, until the largest component of the ionic forces attained a value 0.00045 a.u.. In order to confirm it as local minima, frequency calculations were performed at the same level of the theory. The polarisable continuum model (PCM)<sup>17</sup> using the integral equation formalism variant (IEFPCM) was employed to investigate the effect of the solvent. The solvent descriptors were assumed to vary linearly with the molar fraction of each component of the homogeneous mixture (binary solvent).

The free energies for the optimized structures in binary solvent are given in Table S2 of the supplementary data. Then, the relative free energies ( $G^{\circ}_{\text{rel}}$ ) were computed, based on stoichiometric considerations. The free energy of the starting material 1-(bromoethyl)benzene **1a** was arbitrarily taken as zero and the energy of other intermediate molecules and complexes in figure 5 (main text) was normalized to **1a**. The free energy of Pd-carbene complex with different ligands in figure S12 was normalized to A ( $G^{\circ}_{\text{A}} = 0.0$ ).

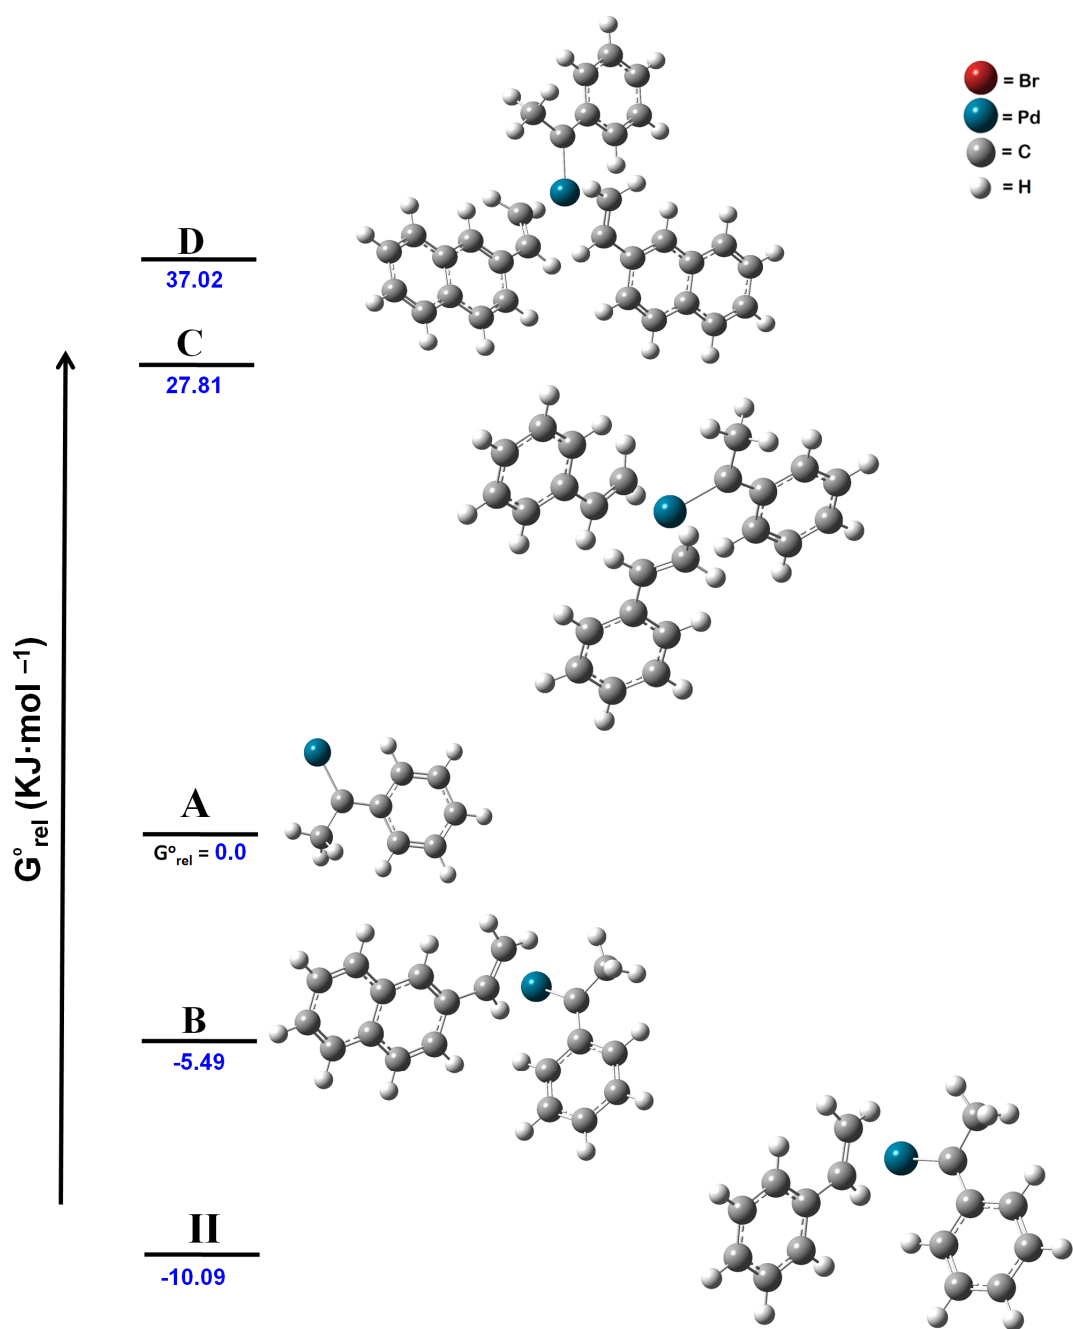

**Figure S12.** Optimized geometries and their Relative Gibbs Free energy ( $G^{\circ}_{rel}$ ) profile diagram of Pd-carbene complexes, showing relative stability of Pd-carbene complex with different ligands.  $G^{\circ}_{rel}$  calculated w.r.t. A ( $G^{\circ}_A = 0.0$ ) in binary solvent DMF-H<sub>2</sub>O.

**Table S2.** Optimized molecular geometries

| Sl. No. | Comp. | Optimized geometry                                                                  | Structure                                                                             |
|---------|-------|-------------------------------------------------------------------------------------|---------------------------------------------------------------------------------------|
| 1       | 1a    | 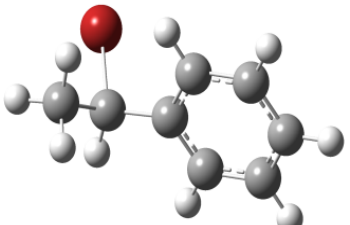   |    |
| 2       | 3a    |    |    |
| 3       | 3a'   |   |   |
| 4       | I     |  |  |
| 5       | II    |  |  |

|   |     |                                                                                     |                                                                                       |
|---|-----|-------------------------------------------------------------------------------------|---------------------------------------------------------------------------------------|
| 6 | III | 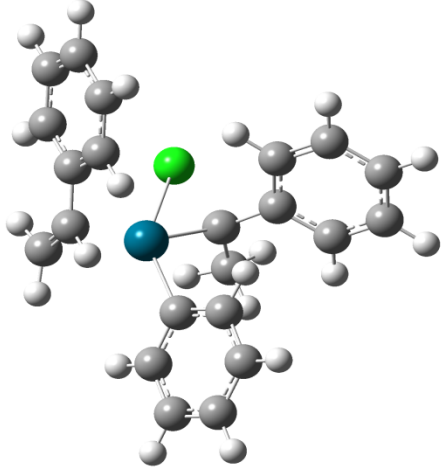   |    |
| 7 | IV  |   |   |
| 8 | IVa |  |  |

|    |    |                                                                                     |                                                                                       |
|----|----|-------------------------------------------------------------------------------------|---------------------------------------------------------------------------------------|
| 9  | VI | 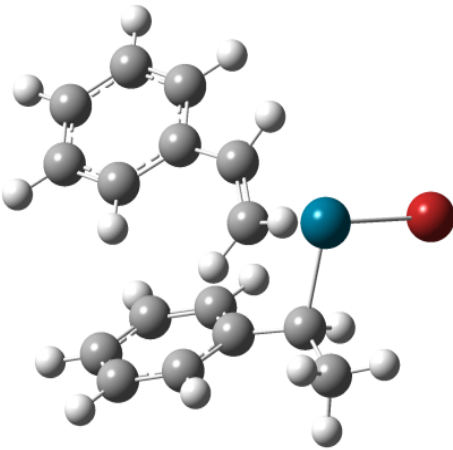   |    |
| 10 | A  |    |    |
| 11 | B  |   |   |
| 12 | C  |  |  |

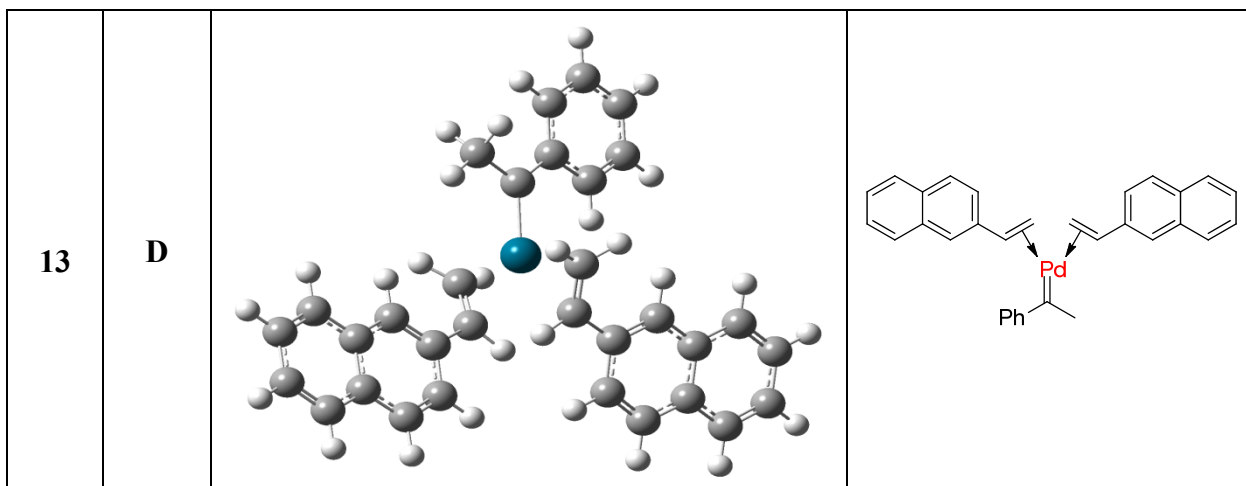

**Table S3. Free energies for the optimized structures in binary solvent**

| Sl. No.           | Structure/ Compound No. | $G^\circ$<br>(a.u.) | Binary Solvent (DMF-H <sub>2</sub> O)                                                                                                                                                                             |                                                        |
|-------------------|-------------------------|---------------------|-------------------------------------------------------------------------------------------------------------------------------------------------------------------------------------------------------------------|--------------------------------------------------------|
|                   |                         |                     | (a.u.)                                                                                                                                                                                                            | Relative Gibbs Free Energy<br>(kJ. mol <sup>-1</sup> ) |
| Data for figure 5 |                         |                     |                                                                                                                                                                                                                   |                                                        |
| 1                 | <b>1a</b>               | -2884.406693        | 0.0                                                                                                                                                                                                               | 0.0                                                    |
| 2                 | <b>I</b>                | -310.217757         | $\{G_I - (G_{Ia} - G_{Br})\} =$<br>$[(-310.217757) - \{(-2884.406693) -$<br>$(-2574.119103)\}] =$<br>0.069833                                                                                                     | 183.35                                                 |
| 3                 | <b>II</b>               | -746.004891         | $\{G_{II} - (G_{Ia} - G_{HBr} + G_{Pd} + G_{styrene})\} =$<br>$[(-746.008200) - \{(-2884.406693)$<br>$- (-2574.764920) + (-126.724511)$<br>$+ (-309.641916)\}] =$<br>0.003309                                     | 8.69                                                   |
| 4                 | <b>III</b>              | -1437.897323        | $\{G_{III} - (G_{Ia} + G_{Pd} - G_{HBr} + G_{phtCl} +$<br>$G_{styrene})\} =$<br>$[(-1437.897323) - \{(-2884.406693)$<br>$+ (-126.724511) - (-2574.764920) +$<br>$(-691.885164) + (-309.641916)\}] =$<br>-0.003959 | -10.39                                                 |
| 5                 | <b>IV</b>               | -1437.958018        | $\{G_{IV} - (\text{as above})\} =$<br>$\{(-1437.958018) - (---)\} =$<br>-0.064654                                                                                                                                 | -169.75                                                |
| 6                 | <b>IVa</b>              | -1437.952824        | $\{G_{IVa} - (\text{as above})\} =$<br>$\{(-1437.952824) - (---)\} =$<br>-0.05946                                                                                                                                 | -156.11                                                |
| 7                 | <b>VI</b>               | -3320.835476        | $\{G_{VI} - (G_{Ia} + G_{Pd} + G_{styrene})\} =$<br>$[(-3320.835476) - \{(-2884.406693)$<br>$+ (-126.724511) + (-309.641916)\}] =$                                                                                | -163.72                                                |

|                     |                             |              |                                                                                                                                                                          |                |  |
|---------------------|-----------------------------|--------------|--------------------------------------------------------------------------------------------------------------------------------------------------------------------------|----------------|--|
|                     |                             |              |                                                                                                                                                                          | =<br>-0.062356 |  |
| 8                   | <i>Trans</i> -Stilbene (3a) | -540.693233  | $\{G_{3a} - (G_{1a} + G_{\text{pHCl}} - G_{\text{HBr}})\} =$<br>[(-540.693233) - {(-2884.406693)<br>+ (-691.885164) - (-460.850000) -<br>(-2574.764920)}] =<br>-0.016296 | -42.78         |  |
| 9                   | 1,1-diphenylethane (3a')    | -540.682965  | $\{G_{3a'} - (\text{as above})\} =$<br>{(540.682965) - (---)} =<br>-0.006028                                                                                             | -15.83         |  |
| Data for figure S12 |                             |              |                                                                                                                                                                          |                |  |
| 10                  | <b>A</b>                    | -436.359133  | 0.0                                                                                                                                                                      | 0.0            |  |
| 11                  | <b>B</b>                    | -899.645431  | $\{G_B - (G_A + G_{\text{vinyl(naphthalene)})}\} =$<br>[(-899.645431) - {(-436.359133) +<br>(-463.284205)}] =<br>-0.002093                                               | -5.49          |  |
| 12                  | <b>C</b>                    | -1055.632373 | $\{G_C - (G_A + (2 \times G_{\text{styrene}}))\} =$<br>[(-1055.632373) - {(-436.359133)<br>+ 2 x (-309.641916)}] =<br>-0.010592                                          | 27.81          |  |
| 13                  | <b>D</b>                    | -1362.913444 | $\{G_D - (G_A + 2 \times G_{\text{vinyl(naphthalene)})}\} =$<br>[(-1362.913444) - {(-436.359133)<br>+ 2 x (-463.284205)}] =<br>0.014099                                  | 37.02          |  |
| 14                  | <b>II</b>                   | -746.004891  | $\{G_{II} - (G_A + G_{\text{styrene}})\} =$<br>[(-746.004891) - {(-436.359133) +<br>(-309.641916)}] =<br>-0.003842                                                       | -10.09         |  |
| Others              |                             |              |                                                                                                                                                                          |                |  |
| 15                  | Chlorobenzene               | -691.885164  |                                                                                                                                                                          | -              |  |
| 16                  | HBr                         | -2574.764920 |                                                                                                                                                                          | -              |  |
| 17                  | HCl                         | -460.850000  |                                                                                                                                                                          | -              |  |
| 18                  | Bromine atom                | -2574.119103 |                                                                                                                                                                          | -              |  |



|    |                     |             |  |   |
|----|---------------------|-------------|--|---|
| 19 | Palladium atom      | -126.724511 |  | - |
| 20 | Styrene             | -309.641916 |  | - |
| 21 | 2-Vinyl naphthalene | -463.284205 |  | - |

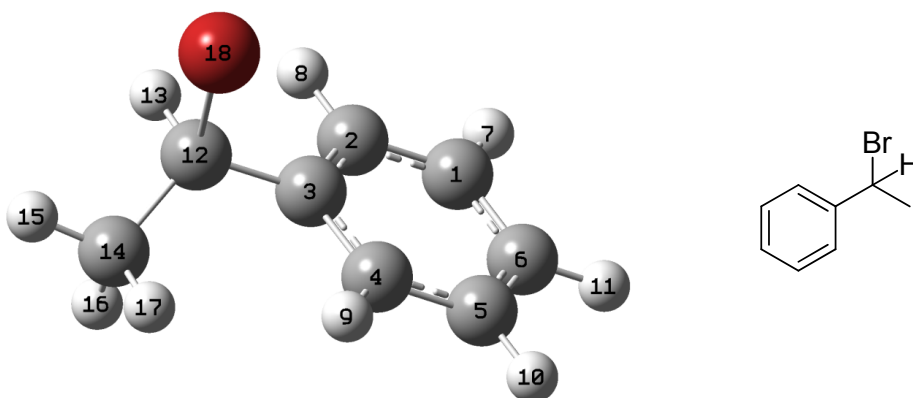

**Figure S13.** Optimized molecular geometry of **1a** by DFT at B3LYP

**Table S4.** X, Y, Z-Cordinates of optimized compound **1a** calculated by DFT at B3LYP

| Center Number | Atomic Number | Atomic Type | Coordinates (Angstroms) |           |           |
|---------------|---------------|-------------|-------------------------|-----------|-----------|
|               |               |             | X                       | Y         | Z         |
| 1             | 6             | 0           | 2.802593                | -0.892344 | 0.769104  |
| 2             | 6             | 0           | 1.488852                | -0.605472 | 1.126005  |
| 3             | 6             | 0           | 0.706524                | 0.250853  | 0.346202  |
| 4             | 6             | 0           | 1.267736                | 0.813102  | -0.805117 |
| 5             | 6             | 0           | 2.578394                | 0.524680  | -1.164713 |
| 6             | 6             | 0           | 3.350644                | -0.328465 | -0.378653 |
| 7             | 1             | 0           | 3.396234                | -1.554659 | 1.387672  |
| 8             | 1             | 0           | 1.066215                | -1.047512 | 2.021408  |
| 9             | 1             | 0           | 0.679083                | 1.472919  | -1.430399 |
| 10            | 1             | 0           | 2.999359                | 0.966891  | -2.059737 |
| 11            | 1             | 0           | 4.372903                | -0.550793 | -0.660174 |
| 12            | 6             | 0           | -0.691495               | 0.559686  | 0.781079  |
| 13            | 1             | 0           | -0.872069               | 0.162443  | 1.774858  |
| 14            | 6             | 0           | -1.137567               | 2.003838  | 0.683914  |
| 15            | 1             | 0           | -2.158688               | 2.119774  | 1.045454  |
| 16            | 1             | 0           | -0.478791               | 2.611790  | 1.311586  |
| 17            | 1             | 0           | -1.084260               | 2.386544  | -0.334940 |
| 18            | 35            | 0           | -2.003259               | -0.586362 | -0.320076 |

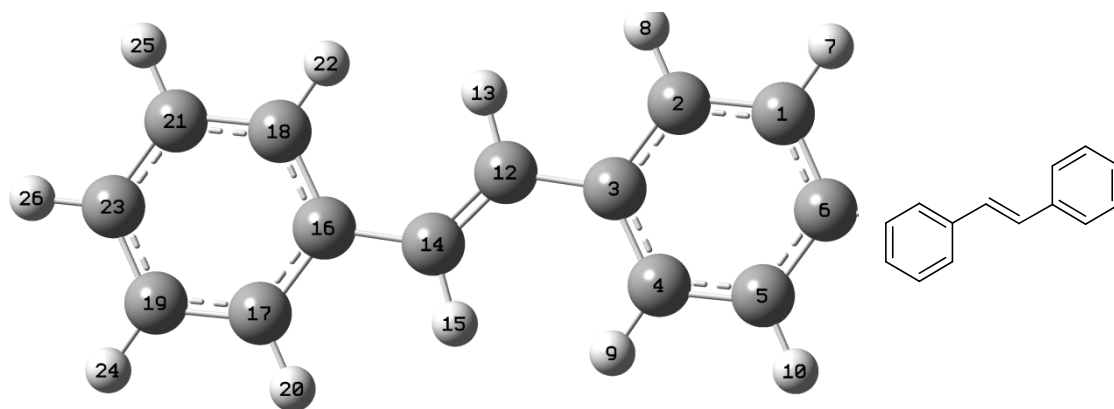

**Figure S14.** Optimized molecular geometry of **3a** by DFT at B3LYP

**Table S5.** X, Y, Z-Coordinates of optimized compound **3a** calculated by DFT at B3LYP

| Center Number | Atomic Number | Atomic Type | Coordinates (Angstroms) |           |           |
|---------------|---------------|-------------|-------------------------|-----------|-----------|
|               |               |             | X                       | Y         | Z         |
| 1             | 6             | 0           | 4.199418                | -1.085732 | 0.000026  |
| 2             | 6             | 0           | 2.821944                | -1.274759 | 0.000047  |
| 3             | 6             | 0           | 1.935800                | -0.185738 | 0.000023  |
| 4             | 6             | 0           | 2.487441                | 1.107374  | -0.000024 |
| 5             | 6             | 0           | 3.861828                | 1.296189  | -0.000046 |
| 6             | 6             | 0           | 4.727223                | 0.201646  | -0.000018 |
| 7             | 1             | 0           | 4.859874                | -1.944899 | 0.000046  |
| 8             | 1             | 0           | 2.419608                | -2.281943 | 0.000084  |
| 9             | 1             | 0           | 1.839292                | 1.974960  | -0.000041 |
| 10            | 1             | 0           | 4.263281                | 2.302848  | -0.000078 |
| 11            | 1             | 0           | 5.799816                | 0.353865  | -0.000032 |
| 12            | 6             | 0           | 0.495582                | -0.453547 | 0.000046  |
| 13            | 1             | 0           | 0.240719                | -1.509532 | 0.000123  |
| 14            | 6             | 0           | -0.495588               | 0.453563  | -0.000028 |
| 15            | 1             | 0           | -0.240745               | 1.509551  | -0.000100 |
| 16            | 6             | 0           | -1.935801               | 0.185733  | -0.000021 |
| 17            | 6             | 0           | -2.821958               | 1.274763  | 0.000036  |
| 18            | 6             | 0           | -2.487426               | -1.107366 | -0.000068 |
| 19            | 6             | 0           | -4.199417               | 1.085731  | 0.000054  |
| 20            | 1             | 0           | -2.419614               | 2.281944  | 0.000065  |
| 21            | 6             | 0           | -3.861827               | -1.296191 | -0.000044 |
| 22            | 1             | 0           | -1.839283               | -1.974959 | -0.000131 |
| 23            | 6             | 0           | -4.727219               | -0.201664 | 0.000018  |
| 24            | 1             | 0           | -4.859890               | 1.944884  | 0.000098  |
| 25            | 1             | 0           | -4.263253               | -2.302861 | -0.000081 |
| 26            | 1             | 0           | -5.799814               | -0.353872 | 0.000033  |

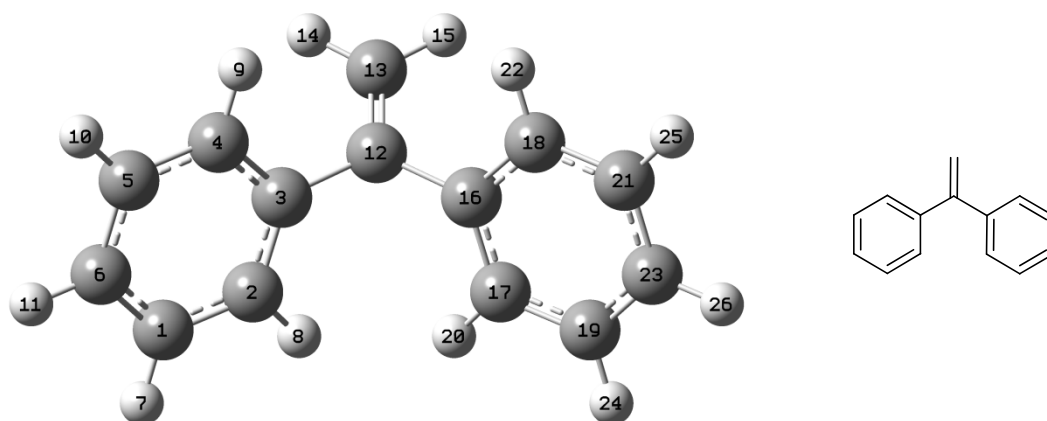

**Figure S15.** Optimized molecular geometry of **3a'** by DFT at B3LYP

**Table S6.** X, Y, Z-Coordinates of optimized compound **3a'** calculated by DFT at B3LYP

| Center Number | Atomic Number | Atomic Type | Coordinates (Angstroms) |           |           |
|---------------|---------------|-------------|-------------------------|-----------|-----------|
|               |               |             | X                       | Y         | Z         |
| 1             | 6             | 0           | 3.598324                | 0.120302  | -0.634897 |
| 2             | 6             | 0           | 2.389887                | 0.805176  | -0.707683 |
| 3             | 6             | 0           | 1.279928                | 0.388271  | 0.037961  |
| 4             | 6             | 0           | 1.414920                | -0.747741 | 0.847102  |
| 5             | 6             | 0           | 2.624320                | -1.429032 | 0.925896  |
| 6             | 6             | 0           | 3.721805                | -0.998034 | 0.184859  |
| 7             | 1             | 0           | 4.441821                | 0.456046  | -1.226666 |
| 8             | 1             | 0           | 2.298924                | 1.663513  | -1.362245 |
| 9             | 1             | 0           | 0.569142                | -1.092992 | 1.429305  |
| 10            | 1             | 0           | 2.709664                | -2.298238 | 1.567429  |
| 11            | 1             | 0           | 4.662137                | -1.533350 | 0.240321  |
| 12            | 6             | 0           | -0.000017               | 1.149602  | 0.000041  |
| 13            | 6             | 0           | -0.000059               | 2.489813  | 0.000053  |
| 14            | 1             | 0           | 0.920737                | 3.055671  | 0.066311  |
| 15            | 1             | 0           | -0.920694               | 3.055903  | -0.066102 |
| 16            | 6             | 0           | -1.279909               | 0.388100  | -0.037875 |
| 17            | 6             | 0           | -2.390093               | 0.805389  | 0.707223  |
| 18            | 6             | 0           | -1.414690               | -0.748183 | -0.846610 |
| 19            | 6             | 0           | -3.598517               | 0.120520  | 0.634371  |
| 20            | 1             | 0           | -2.299387               | 1.664074  | 1.361367  |
| 21            | 6             | 0           | -2.624096               | -1.429510 | -0.925457 |
| 22            | 1             | 0           | -0.568820               | -1.093720 | -1.428505 |
| 23            | 6             | 0           | -3.721790               | -0.998180 | -0.184947 |
| 24            | 1             | 0           | -4.442205               | 0.456548  | 1.225711  |
| 25            | 1             | 0           | -2.709260               | -2.298964 | -1.566677 |
| 26            | 1             | 0           | -4.662139               | -1.533455 | -0.240472 |

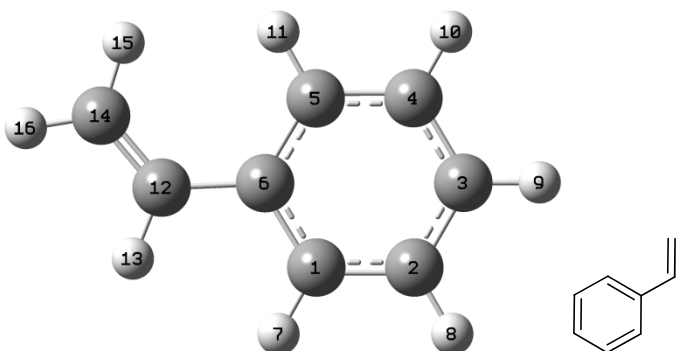

**Figure S16.** Optimized molecular geometry of **styrene** by DFT at B3LYP

**Table S7.** X, Y, Z-Cordinates for optimized geometry of **styrene** calculated by DFT at B3LYP

| Center Number | Atomic Number | Atomic Type | Coordinates (Angstroms) |           |           |
|---------------|---------------|-------------|-------------------------|-----------|-----------|
|               |               |             | X                       | Y         | Z         |
| 1             | 6             | 0           | 5.503298                | -0.407478 | 0.000141  |
| 2             | 6             | 0           | 6.893467                | -0.461409 | 0.000478  |
| 3             | 6             | 0           | 7.635915                | 0.714930  | -0.000119 |
| 4             | 6             | 0           | 6.975093                | 1.943741  | -0.001052 |
| 5             | 6             | 0           | 5.588274                | 1.995818  | -0.001383 |
| 6             | 6             | 0           | 4.823846                | 0.818517  | -0.000786 |
| 7             | 1             | 0           | 4.930526                | -1.328501 | 0.000607  |
| 8             | 1             | 0           | 7.395018                | -1.421985 | 0.001196  |
| 9             | 1             | 0           | 8.718709                | 0.678356  | 0.000135  |
| 10            | 1             | 0           | 7.546091                | 2.864859  | -0.001529 |
| 11            | 1             | 0           | 5.096832                | 2.961135  | -0.002128 |
| 12            | 6             | 0           | 3.352653                | 0.813555  | -0.001086 |
| 13            | 1             | 0           | 2.905766                | -0.177678 | -0.000751 |
| 14            | 6             | 0           | 2.535923                | 1.869218  | -0.001697 |
| 15            | 1             | 0           | 2.895905                | 2.891578  | -0.002043 |
| 16            | 1             | 0           | 1.461443                | 1.735605  | -0.001864 |

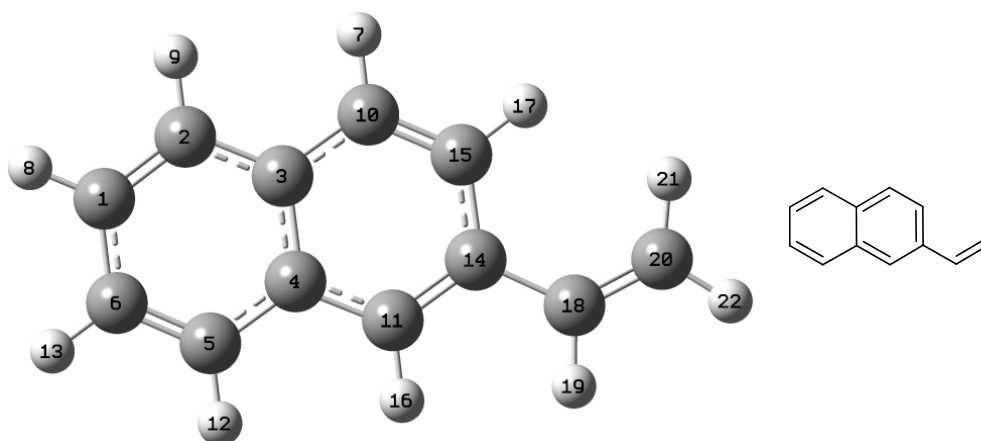

**Figure S17.** Optimized molecular geometry of **2-vinylnaphthalene** by DFT at B3LYP

**Table S8.** X, Y, Z-Coordinates of optimized 2-vinylnaphthalene molecule, calculated by DFT at B3LYP

| Center Number | Atomic Number | Atomic Type | Coordinates (Angstroms) |           |           |
|---------------|---------------|-------------|-------------------------|-----------|-----------|
|               |               |             | X                       | Y         | Z         |
| 1             | 6             | 0           | 3.236131                | 0.043126  | 0.000000  |
| 2             | 1             | 0           | 3.821136                | 0.959359  | -0.000002 |
| 3             | 6             | 0           | 3.894036                | -1.118271 | 0.000001  |
| 4             | 1             | 0           | 4.976557                | -1.138272 | 0.000000  |
| 5             | 1             | 0           | 3.391795                | -2.078776 | 0.000002  |
| 6             | 6             | 0           | 1.778816                | 0.250231  | 0.000000  |
| 7             | 6             | 0           | 1.289042                | 1.586410  | 0.000000  |
| 8             | 6             | 0           | 0.860704                | -0.783061 | 0.000000  |
| 9             | 6             | 0           | -0.053983               | 1.857140  | 0.000000  |
| 10            | 1             | 0           | 2.002457                | 2.403080  | 0.000000  |
| 11            | 6             | 0           | -0.531395               | -0.540799 | 0.000000  |
| 12            | 1             | 0           | 1.196482                | -1.813715 | -0.000001 |
| 13            | 6             | 0           | -1.006070               | 0.807822  | 0.000000  |
| 14            | 1             | 0           | -0.403377               | 2.883618  | 0.000000  |
| 15            | 6             | 0           | -1.479607               | -1.598753 | 0.000000  |
| 16            | 1             | 0           | -1.121145               | -2.622165 | 0.000000  |
| 17            | 6             | 0           | -2.403534               | 1.045820  | 0.000000  |
| 18            | 1             | 0           | -2.759680               | 2.070002  | 0.000000  |
| 19            | 6             | 0           | -3.293027               | 0.000670  | 0.000000  |
| 20            | 1             | 0           | -4.359081               | 0.193988  | 0.000000  |
| 21            | 6             | 0           | -2.825515               | -1.334779 | 0.000000  |
| 22            | 1             | 0           | -3.538734               | -2.150443 | 0.000000  |

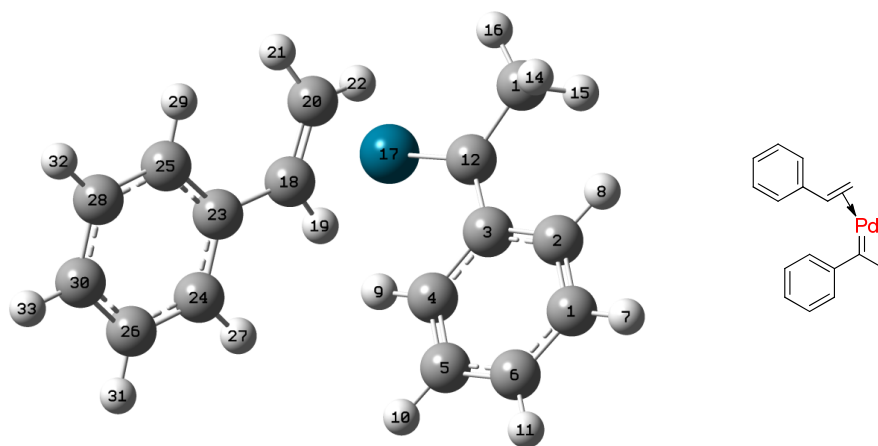

**Figure S18.** Optimized molecular geometry of **II** by DFT at B3LYP

**Table S9.** X, Y, Z-Coordinates of optimized intermediate **II**, calculated by DFT at B3LYP

| Center Number | Atomic Number | Atomic Type | Coordinates (Angstroms) |           |           |
|---------------|---------------|-------------|-------------------------|-----------|-----------|
|               |               |             | X                       | Y         | Z         |
| 1             | 6             | 0           | 2.306880                | 0.810092  | 1.205375  |
| 2             | 6             | 0           | 1.597646                | 1.568113  | 0.288246  |
| 3             | 6             | 0           | 0.385627                | 1.098131  | -0.267188 |
| 4             | 6             | 0           | -0.070924               | -0.170685 | 0.150086  |
| 5             | 6             | 0           | 0.634607                | -0.928729 | 1.070898  |
| 6             | 6             | 0           | 1.827136                | -0.439202 | 1.600343  |
| 7             | 1             | 0           | 3.234657                | 1.188017  | 1.617573  |
| 8             | 1             | 0           | 1.989405                | 2.533643  | -0.001593 |
| 9             | 1             | 0           | -0.999567               | -0.537256 | -0.272525 |
| 10            | 1             | 0           | 0.261534                | -1.898310 | 1.377126  |
| 11            | 1             | 0           | 2.383563                | -1.028722 | 2.319425  |
| 12            | 6             | 0           | -0.404442               | 1.851600  | -1.232950 |
| 13            | 6             | 0           | 0.121335                | 3.208711  | -1.591936 |
| 14            | 1             | 0           | 0.232092                | 3.835767  | -0.697405 |
| 15            | 1             | 0           | 1.123650                | 3.129706  | -2.034098 |
| 16            | 1             | 0           | -0.518629               | 3.730409  | -2.298181 |
| 17            | 46            | 0           | -2.081972               | 1.210814  | -2.098074 |
| 18            | 6             | 0           | -3.927998               | 0.091178  | -2.853185 |
| 19            | 1             | 0           | -3.484160               | -0.790701 | -3.306002 |
| 20            | 6             | 0           | -3.812950               | 1.282267  | -3.524921 |
| 21            | 1             | 0           | -4.397021               | 2.155118  | -3.259372 |
| 22            | 1             | 0           | -3.335336               | 1.309501  | -4.496549 |
| 23            | 6             | 0           | -4.796660               | -0.192941 | -1.694713 |
| 24            | 6             | 0           | -4.875893               | -1.509423 | -1.219127 |
| 25            | 6             | 0           | -5.570133               | 0.787017  | -1.053371 |
| 26            | 6             | 0           | -5.691141               | -1.838127 | -0.141486 |
| 27            | 1             | 0           | -4.288935               | -2.282305 | -1.703142 |
| 28            | 6             | 0           | -6.385649               | 0.459078  | 0.021115  |
| 29            | 1             | 0           | -5.534580               | 1.814488  | -1.393555 |
| 30            | 6             | 0           | -6.450545               | -0.854658 | 0.484777  |
| 31            | 1             | 0           | -5.734469               | -2.863369 | 0.206905  |
| 32            | 1             | 0           | -6.974825               | 1.231848  | 0.500919  |
| 33            | 1             | 0           | -7.087560               | -1.106417 | 1.324108  |

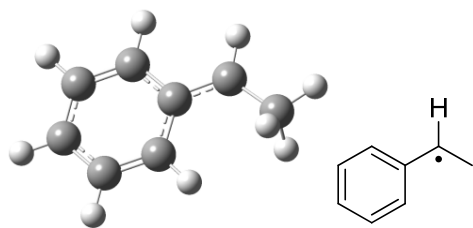

**Figure S19.** Optimized molecular geometry of **IVa** by DFT at B3LYP

**Table S10.** X, Y, Z-Cordinates of optimized intermediate **IVa**, calculated by DFT at B3LYP

| Center Number | Atomic Number | Atomic Type | Coordinates (Angstroms) |           |           |
|---------------|---------------|-------------|-------------------------|-----------|-----------|
|               |               |             | X                       | Y         | Z         |
| 1             | 6             | 0           | -1.334968               | 1.362203  | 0.000003  |
| 2             | 6             | 0           | 0.015264                | 1.056374  | 0.000022  |
| 3             | 6             | 0           | 0.461274                | -0.294467 | 0.000018  |
| 4             | 6             | 0           | -0.539399               | -1.306925 | 0.000011  |
| 5             | 6             | 0           | -1.884083               | -0.989042 | -0.000007 |
| 6             | 6             | 0           | -2.296555               | 0.348255  | -0.000020 |
| 7             | 1             | 0           | -1.648047               | 2.400124  | 0.000005  |
| 8             | 1             | 0           | 0.742455                | 1.858792  | 0.000036  |
| 9             | 1             | 0           | -0.228892               | -2.346126 | 0.000014  |
| 10            | 1             | 0           | -2.623635               | -1.781583 | -0.000016 |
| 11            | 1             | 0           | -3.351168               | 0.595077  | -0.000036 |
| 12            | 6             | 0           | 1.828852                | -0.644481 | 0.000006  |
| 13            | 1             | 0           | 2.069443                | -1.701969 | 0.000002  |
| 14            | 6             | 0           | 2.958547                | 0.331297  | -0.000020 |
| 15            | 1             | 0           | 2.933337                | 0.989558  | 0.877192  |
| 16            | 1             | 0           | 3.919641                | -0.182734 | -0.000060 |
| 17            | 1             | 0           | 2.933274                | 0.989579  | -0.877215 |



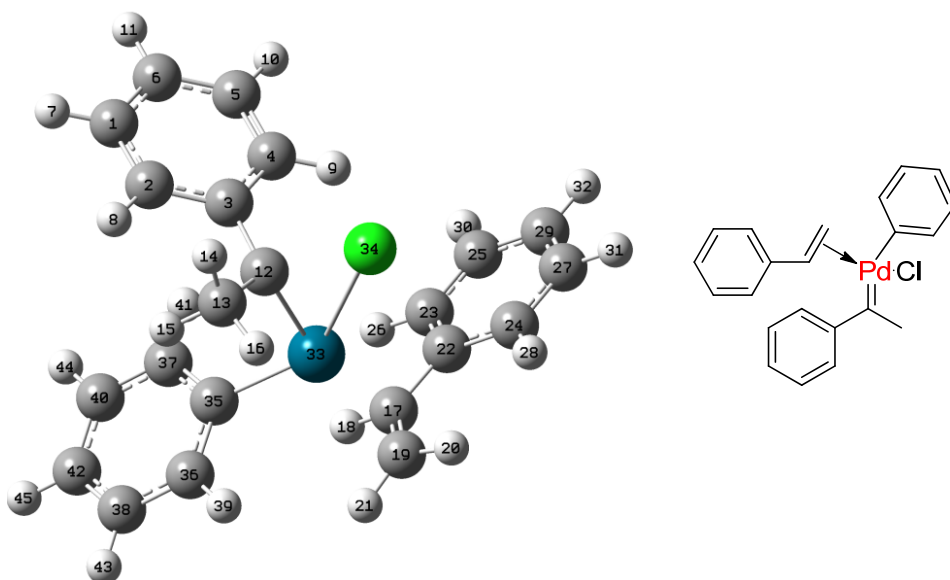

**Figure S20.** Optimized molecular geometry of **III** by DFT at B3LYP

**Table S11.** X, Y, Z-Coordinates of optimized intermediate **III**, calculated by DFT at B3LYP

| Center Number | Atomic Number | Atomic Type | Coordinates (Angstroms) |           |           |
|---------------|---------------|-------------|-------------------------|-----------|-----------|
|               |               |             | X                       | Y         | Z         |
| 1             | 6             | 0           | 3.317367                | 2.965500  | 1.005594  |
| 2             | 6             | 0           | 2.902073                | 2.135226  | -0.034572 |
| 3             | 6             | 0           | 1.544704                | 1.855944  | -0.240548 |
| 4             | 6             | 0           | 0.619006                | 2.446989  | 0.635527  |
| 5             | 6             | 0           | 1.030519                | 3.281923  | 1.662912  |
| 6             | 6             | 0           | 2.386914                | 3.546190  | 1.857112  |
| 7             | 1             | 0           | 4.375118                | 3.159328  | 1.141300  |
| 8             | 1             | 0           | 3.652400                | 1.702579  | -0.681741 |
| 9             | 1             | 0           | -0.437158               | 2.247952  | 0.503014  |
| 10            | 1             | 0           | 0.291624                | 3.726745  | 2.319351  |
| 11            | 1             | 0           | 2.708991                | 4.195336  | 2.662510  |
| 12            | 6             | 0           | 1.108445                | 0.918528  | -1.321741 |
| 13            | 6             | 0           | 2.151788                | 0.530692  | -2.345761 |
| 14            | 1             | 0           | 2.628351                | 1.403770  | -2.805072 |
| 15            | 1             | 0           | 2.925919                | -0.068390 | -1.862136 |
| 16            | 1             | 0           | 1.712612                | -0.077313 | -3.135010 |
| 17            | 6             | 0           | -1.936589               | -1.813922 | 0.361515  |
| 18            | 1             | 0           | -1.433312               | -2.119877 | 1.272752  |
| 19            | 6             | 0           | -1.605918               | -2.455301 | -0.792825 |
| 20            | 1             | 0           | -2.157092               | -2.307710 | -1.713740 |
| 21            | 1             | 0           | -0.903764               | -3.277183 | -0.776933 |
| 22            | 6             | 0           | -3.027951               | -0.843924 | 0.559631  |
| 23            | 6             | 0           | -3.245651               | -0.336487 | 1.847822  |
| 24            | 6             | 0           | -3.875157               | -0.419541 | -0.475053 |
| 25            | 6             | 0           | -4.272485               | 0.566678  | 2.097941  |
| 26            | 1             | 0           | -2.601865               | -0.657377 | 2.659053  |
| 27            | 6             | 0           | -4.898989               | 0.483477  | -0.225609 |
| 28            | 1             | 0           | -3.737705               | -0.796202 | -1.480983 |
| 29            | 6             | 0           | -5.102797               | 0.981040  | 1.061238  |
| 30            | 1             | 0           | -4.424210               | 0.945227  | 3.101658  |

|    |    |   |           |           |           |
|----|----|---|-----------|-----------|-----------|
| 31 | 1  | 0 | -5.544168 | 0.799587  | -1.036595 |
| 32 | 1  | 0 | -5.904471 | 1.684240  | 1.251966  |
| 33 | 46 | 0 | -0.148047 | -0.611608 | -0.725904 |
| 34 | 17 | 0 | -0.308127 | 1.767865  | -2.312767 |
| 35 | 6  | 0 | 1.355613  | -1.571493 | 0.204050  |
| 36 | 6  | 0 | 2.047752  | -2.602104 | -0.438211 |
| 37 | 6  | 0 | 1.678531  | -1.272826 | 1.529778  |
| 38 | 6  | 0 | 3.035361  | -3.323439 | 0.234766  |
| 39 | 1  | 0 | 1.827217  | -2.853899 | -1.469310 |
| 40 | 6  | 0 | 2.662848  | -1.997896 | 2.203574  |
| 41 | 1  | 0 | 1.171035  | -0.468560 | 2.049907  |
| 42 | 6  | 0 | 3.345857  | -3.025398 | 1.558753  |
| 43 | 1  | 0 | 3.561485  | -4.119328 | -0.281517 |
| 44 | 1  | 0 | 2.896798  | -1.752465 | 3.234013  |
| 45 | 1  | 0 | 4.113057  | -3.585314 | 2.080773  |

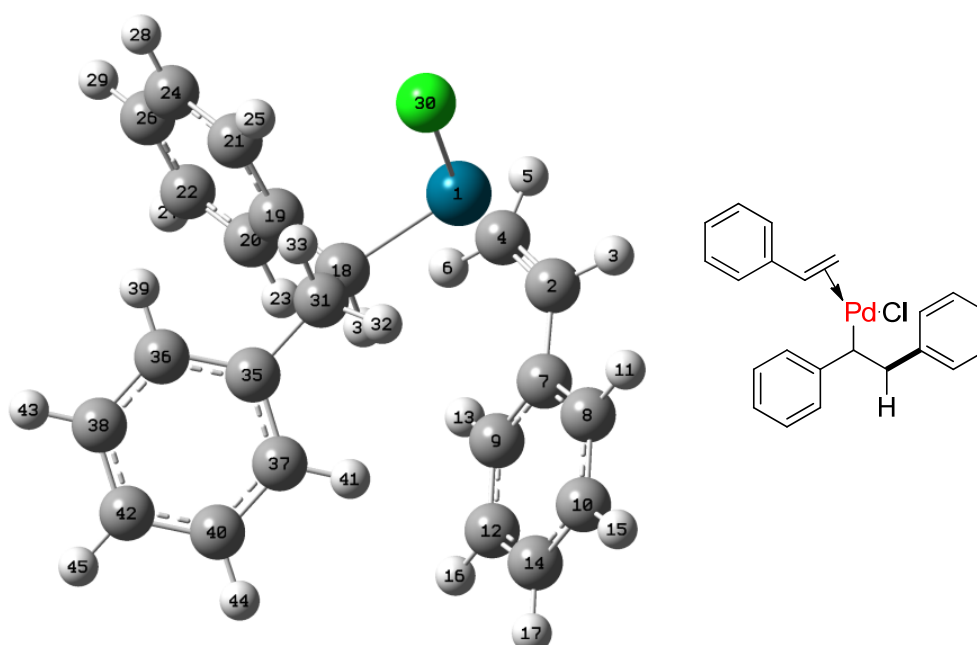

**Figure S21.** Optimized molecular geometry of **IV** by DFT at B3LYP

**Table S12.** X, Y, Z-Coordinates of optimized intermediate **IV**, calculated by DFT at B3LYP

| Center Number | Atomic Number | Atomic Type | Coordinates (Angstroms) |           |           |
|---------------|---------------|-------------|-------------------------|-----------|-----------|
|               |               |             | X                       | Y         | Z         |
| 1             | 46            | 0           | 0.025095                | -1.990231 | -0.323930 |
| 2             | 6             | 0           | 2.058171                | -2.040129 | 0.694814  |
| 3             | 1             | 0           | 2.436316                | -2.883724 | 0.122819  |
| 4             | 6             | 0           | 1.039990                | -2.285998 | 1.599020  |
| 5             | 1             | 0           | 0.737909                | -3.305805 | 1.808141  |
| 6             | 1             | 0           | 0.752229                | -1.551576 | 2.339058  |
| 7             | 6             | 0           | 2.895788                | -0.832349 | 0.611332  |
| 8             | 6             | 0           | 3.738139                | -0.665741 | -0.497804 |
| 9             | 6             | 0           | 2.929381                | 0.135240  | 1.625148  |
| 10            | 6             | 0           | 4.570811                | 0.440425  | -0.601729 |
| 11            | 1             | 0           | 3.733288                | -1.412268 | -1.283919 |

|    |    |   |           |           |           |
|----|----|---|-----------|-----------|-----------|
| 12 | 6  | 0 | 3.765033  | 1.240853  | 1.521844  |
| 13 | 1  | 0 | 2.320837  | 0.015234  | 2.512520  |
| 14 | 6  | 0 | 4.585576  | 1.400028  | 0.408000  |
| 15 | 1  | 0 | 5.211776  | 0.552671  | -1.467818 |
| 16 | 1  | 0 | 3.782865  | 1.975039  | 2.318300  |
| 17 | 1  | 0 | 5.238654  | 2.260958  | 0.331975  |
| 18 | 6  | 0 | -0.488533 | -0.019907 | 0.095358  |
| 19 | 6  | 0 | -1.845169 | -0.117695 | 0.682314  |
| 20 | 6  | 0 | -1.996899 | -0.038969 | 2.077161  |
| 21 | 6  | 0 | -3.002315 | -0.269883 | -0.099715 |
| 22 | 6  | 0 | -3.251476 | -0.104148 | 2.668251  |
| 23 | 1  | 0 | -1.120096 | 0.092803  | 2.700429  |
| 24 | 6  | 0 | -4.255944 | -0.338214 | 0.491337  |
| 25 | 1  | 0 | -2.913750 | -0.360811 | -1.173775 |
| 26 | 6  | 0 | -4.387205 | -0.256334 | 1.876673  |
| 27 | 1  | 0 | -3.344219 | -0.032772 | 3.745304  |
| 28 | 1  | 0 | -5.135765 | -0.458352 | -0.129541 |
| 29 | 1  | 0 | -5.367464 | -0.310288 | 2.334800  |
| 30 | 17 | 0 | -1.196014 | -2.326118 | -2.441834 |
| 31 | 6  | 0 | -0.283444 | 0.798651  | -1.178884 |
| 32 | 1  | 0 | 0.721759  | 0.603082  | -1.557886 |
| 33 | 1  | 0 | -0.982467 | 0.487922  | -1.952163 |
| 34 | 1  | 0 | 0.240159  | 0.268361  | 0.849912  |
| 35 | 6  | 0 | -0.432286 | 2.288881  | -0.913487 |
| 36 | 6  | 0 | -1.607046 | 2.962790  | -1.255093 |
| 37 | 6  | 0 | 0.604207  | 3.015833  | -0.321168 |
| 38 | 6  | 0 | -1.744140 | 4.327320  | -1.013401 |
| 39 | 1  | 0 | -2.420316 | 2.418682  | -1.721516 |
| 40 | 6  | 0 | 0.470487  | 4.379203  | -0.076343 |
| 41 | 1  | 0 | 1.527737  | 2.513297  | -0.055701 |
| 42 | 6  | 0 | -0.705986 | 5.040177  | -0.420784 |
| 43 | 1  | 0 | -2.661499 | 4.832982  | -1.291646 |
| 44 | 1  | 0 | 1.287546  | 4.926769  | 0.378921  |
| 45 | 1  | 0 | -0.810469 | 6.102242  | -0.233328 |

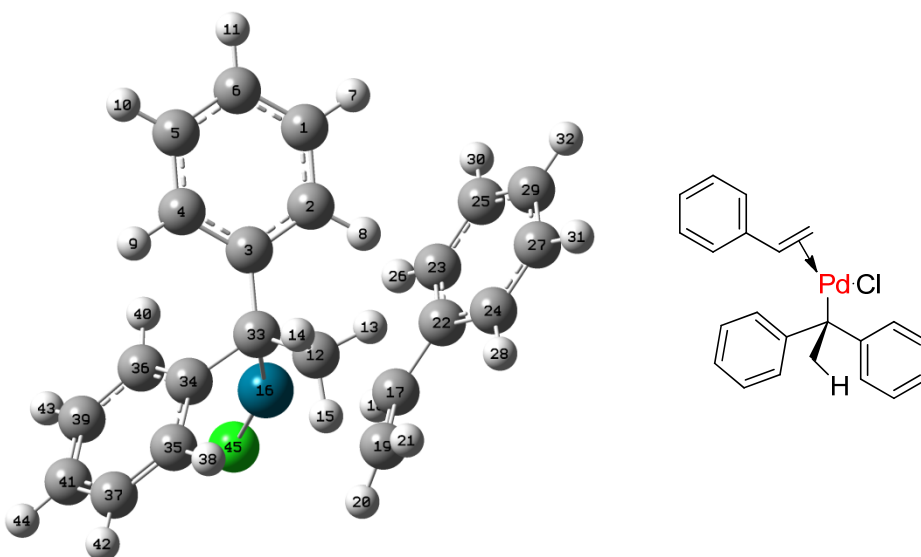

**Figure S22.** Optimized molecular geometry of **IVa** by DFT at B3LYP

**Table S13.** X, Y, Z-Cordinates of optimized intermediate **IVa**, calculated by DFT at B3LYP

| Center<br>Number | Atomic<br>Number | Atomic<br>Type | Coordinates (Angstroms) |           |           |
|------------------|------------------|----------------|-------------------------|-----------|-----------|
|                  |                  |                | X                       | Y         | Z         |
| 1                | 6                | 0              | 2.100984                | 2.965340  | -0.754205 |
| 2                | 6                | 0              | 1.429052                | 1.955514  | -0.075767 |
| 3                | 6                | 0              | 0.050075                | 2.035980  | 0.156784  |
| 4                | 6                | 0              | -0.625833               | 3.182268  | -0.288513 |
| 5                | 6                | 0              | 0.048121                | 4.197310  | -0.958367 |
| 6                | 6                | 0              | 1.414003                | 4.090971  | -1.200494 |
| 7                | 1                | 0              | 3.165574                | 2.872685  | -0.932015 |
| 8                | 1                | 0              | 1.981255                | 1.090641  | 0.264359  |
| 9                | 1                | 0              | -1.684345               | 3.293110  | -0.091474 |
| 10               | 1                | 0              | -0.496328               | 5.075867  | -1.283730 |
| 11               | 1                | 0              | 1.939399                | 4.880286  | -1.724495 |
| 12               | 6                | 0              | -0.174223               | 0.898466  | 2.389467  |
| 13               | 1                | 0              | 0.909769                | 0.787871  | 2.414170  |
| 14               | 1                | 0              | -0.408981               | 1.828293  | 2.920741  |
| 15               | 1                | 0              | -0.618687               | 0.070282  | 2.937887  |
| 16               | 46               | 0              | -0.728118               | -0.867842 | -0.146850 |
| 17               | 6                | 0              | 1.310266                | -2.186907 | 0.201595  |
| 18               | 1                | 0              | 1.114741                | -2.793325 | -0.675799 |
| 19               | 6                | 0              | 0.427709                | -2.282888 | 1.242377  |
| 20               | 1                | 0              | -0.347714               | -3.037966 | 1.226573  |
| 21               | 1                | 0              | 0.620487                | -1.810304 | 2.195830  |
| 22               | 6                | 0              | 2.611124                | -1.502786 | 0.205442  |
| 23               | 6                | 0              | 3.283733                | -1.322364 | -1.011906 |
| 24               | 6                | 0              | 3.236248                | -1.066330 | 1.382824  |
| 25               | 6                | 0              | 4.525263                | -0.700984 | -1.057070 |
| 26               | 1                | 0              | 2.820320                | -1.667476 | -1.929165 |
| 27               | 6                | 0              | 4.478368                | -0.446633 | 1.337614  |
| 28               | 1                | 0              | 2.760462                | -1.227548 | 2.341973  |
| 29               | 6                | 0              | 5.125537                | -0.256420 | 0.118080  |
| 30               | 1                | 0              | 5.025497                | -0.565070 | -2.008361 |
| 31               | 1                | 0              | 4.948140                | -0.118956 | 2.257216  |
| 32               | 1                | 0              | 6.095168                | 0.225562  | 0.086239  |
| 33               | 6                | 0              | -0.667946               | 0.992026  | 0.961595  |
| 34               | 6                | 0              | -2.077845               | 0.757513  | 0.681091  |
| 35               | 6                | 0              | -3.042321               | 0.423141  | 1.672689  |
| 36               | 6                | 0              | -2.473341               | 0.668236  | -0.687776 |
| 37               | 6                | 0              | -4.318655               | 0.062535  | 1.315189  |
| 38               | 1                | 0              | -2.775578               | 0.483820  | 2.718861  |
| 39               | 6                | 0              | -3.779498               | 0.269097  | -1.027197 |
| 40               | 1                | 0              | -1.828760               | 1.054966  | -1.466898 |
| 41               | 6                | 0              | -4.692362               | -0.025789 | -0.040714 |
| 42               | 1                | 0              | -5.047514               | -0.159013 | 2.085339  |
| 43               | 1                | 0              | -4.062237               | 0.219505  | -2.070985 |
| 44               | 1                | 0              | -5.703135               | -0.314711 | -0.301099 |
| 45               | 17               | 0              | -1.414402               | -2.735974 | -1.740380 |

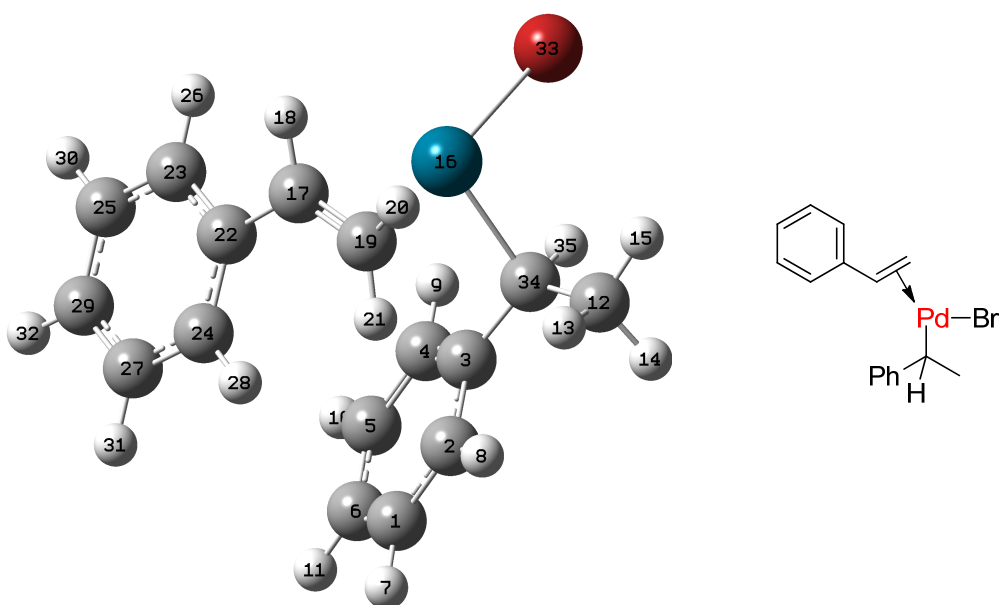

**Figure S23.** Optimized molecular geometry of VI by DFT at B3LYP

**Table S14.** X, Y, Z-Coordinates of optimized intermediate VI, calculated by DFT at B3LYP

| Center Number | Atomic Number | Atomic Type | Coordinates (Angstroms) |           |           |
|---------------|---------------|-------------|-------------------------|-----------|-----------|
|               |               |             | X                       | Y         | Z         |
| 1             | 6             | 0           | 1.916239                | -0.315202 | 0.961483  |
| 2             | 6             | 0           | 0.820134                | 0.528499  | 0.828334  |
| 3             | 6             | 0           | -0.098049               | 0.356494  | -0.219688 |
| 4             | 6             | 0           | 0.117618                | -0.704187 | -1.117910 |
| 5             | 6             | 0           | 1.207094                | -1.550927 | -0.980131 |
| 6             | 6             | 0           | 2.114878                | -1.356747 | 0.059752  |
| 7             | 1             | 0           | 2.620747                | -0.155364 | 1.769049  |
| 8             | 1             | 0           | 0.697361                | 1.343877  | 1.529568  |
| 9             | 1             | 0           | -0.576471               | -0.848323 | -1.938103 |
| 10            | 1             | 0           | 1.356359                | -2.357342 | -1.688114 |
| 11            | 1             | 0           | 2.971829                | -2.011284 | 0.164104  |
| 12            | 6             | 0           | -1.153653               | 2.678925  | 0.137551  |
| 13            | 1             | 0           | -1.077476               | 2.671954  | 1.224556  |
| 14            | 1             | 0           | -0.274488               | 3.209330  | -0.251388 |
| 15            | 1             | 0           | -2.032980               | 3.259889  | -0.140265 |
| 16            | 46            | 0           | -3.076312               | 0.503740  | 0.056767  |
| 17            | 6             | 0           | -3.016572               | -0.916450 | 1.869151  |
| 18            | 1             | 0           | -4.090439               | -1.085755 | 1.796418  |
| 19            | 6             | 0           | -2.604526               | 0.340527  | 2.247103  |
| 20            | 1             | 0           | -3.325643               | 1.064757  | 2.606376  |
| 21            | 1             | 0           | -1.567028               | 0.543744  | 2.473138  |
| 22            | 6             | 0           | -2.213182               | -2.142278 | 1.781505  |
| 23            | 6             | 0           | -2.751859               | -3.261503 | 1.128235  |
| 24            | 6             | 0           | -0.957686               | -2.263057 | 2.390816  |
| 25            | 6             | 0           | -2.047951               | -4.455951 | 1.064497  |
| 26            | 1             | 0           | -3.729806               | -3.186286 | 0.666264  |
| 27            | 6             | 0           | -0.256625               | -3.460380 | 2.331853  |
| 28            | 1             | 0           | -0.535222               | -1.425719 | 2.930164  |
| 29            | 6             | 0           | -0.795499               | -4.558819 | 1.666478  |

|    |    |   |           |           |           |
|----|----|---|-----------|-----------|-----------|
| 30 | 1  | 0 | -2.477106 | -5.308580 | 0.552209  |
| 31 | 1  | 0 | 0.710401  | -3.539727 | 2.813472  |
| 32 | 1  | 0 | -0.247596 | -5.492591 | 1.626278  |
| 33 | 35 | 0 | -4.123518 | 1.091505  | -2.211160 |
| 34 | 6  | 0 | -1.204511 | 1.297172  | -0.474770 |
| 35 | 1  | 0 | -1.418626 | 1.344605  | -1.539342 |

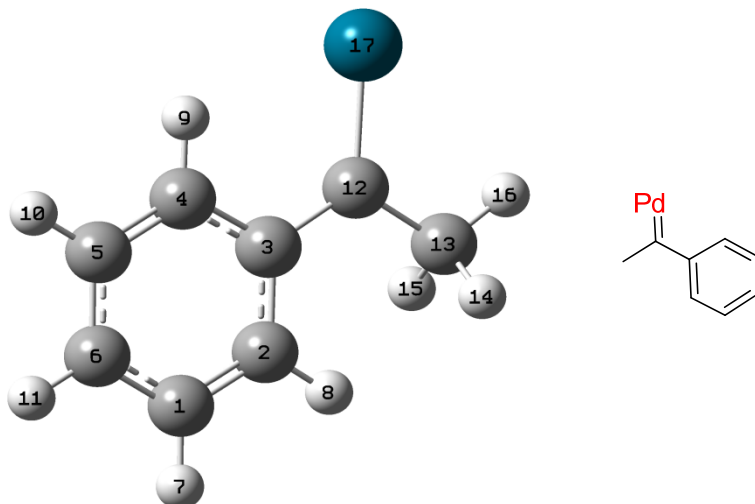

**Figure S24.** Optimized molecular geometry of **A** by DFT at B3LYP

**Table S15.** X, Y, Z-Cordinates of optimized geometry **A** calculated by DFT at B3LYP

| Center Number | Atomic Number | Atomic Type | Coordinates (Angstroms) |           |           |
|---------------|---------------|-------------|-------------------------|-----------|-----------|
|               |               |             | X                       | Y         | Z         |
| 1             | 6             | 0           | 2.552830                | -1.559456 | -0.105046 |
| 2             | 6             | 0           | 1.252851                | -1.079056 | -0.125932 |
| 3             | 6             | 0           | 0.974488                | 0.299766  | -0.033204 |
| 4             | 6             | 0           | 2.073857                | 1.176482  | 0.089587  |
| 5             | 6             | 0           | 3.374850                | 0.696035  | 0.129046  |
| 6             | 6             | 0           | 3.619848                | -0.672282 | 0.027999  |
| 7             | 1             | 0           | 2.738501                | -2.623773 | -0.185236 |
| 8             | 1             | 0           | 0.409856                | -1.754706 | -0.217496 |
| 9             | 1             | 0           | 1.912642                | 2.243175  | 0.166487  |
| 10            | 1             | 0           | 4.201828                | 1.387845  | 0.236142  |
| 11            | 1             | 0           | 4.637087                | -1.044763 | 0.054529  |
| 12            | 6             | 0           | -0.415953               | 0.765915  | -0.064111 |
| 13            | 6             | 0           | -0.605341               | 2.254265  | -0.153721 |
| 14            | 1             | 0           | -0.246270               | 2.729557  | 0.769723  |
| 15            | 1             | 0           | -0.021227               | 2.689360  | -0.974591 |
| 16            | 1             | 0           | -1.647519               | 2.531111  | -0.282499 |
| 17            | 46            | 0           | -1.933684               | -0.379300 | 0.040114  |

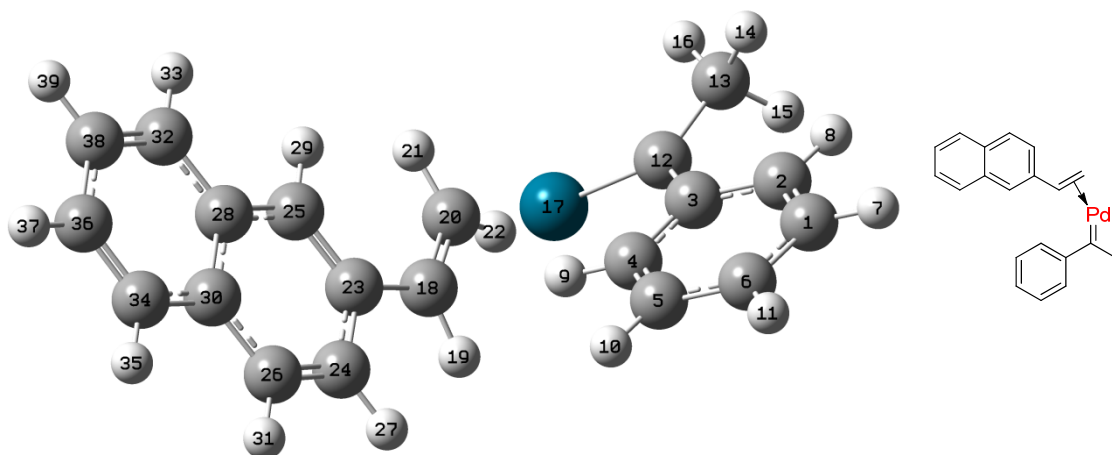

**Figure S25.** Optimized molecular geometry of **B** by DFT at B3LYP

**Table S16.** X, Y, Z-Coordinates of optimized intermediate **B**, calculated by DFT at B3LYP

| Center Number | Atomic Number | Atomic Type | Coordinates (Angstroms) |           |           |
|---------------|---------------|-------------|-------------------------|-----------|-----------|
|               |               |             | X                       | Y         | Z         |
| 1             | 6             | 0           | 1.971100                | 0.938637  | 1.570821  |
| 2             | 6             | 0           | 1.481732                | 1.554445  | 0.430590  |
| 3             | 6             | 0           | 0.305085                | 1.092447  | -0.202110 |
| 4             | 6             | 0           | -0.349156               | -0.017572 | 0.374409  |
| 5             | 6             | 0           | 0.137813                | -0.634257 | 1.515836  |
| 6             | 6             | 0           | 1.301081                | -0.156775 | 2.116665  |
| 7             | 1             | 0           | 2.875161                | 1.307951  | 2.039647  |
| 8             | 1             | 0           | 2.018553                | 2.401875  | 0.026402  |
| 9             | 1             | 0           | -1.252516               | -0.377107 | -0.105268 |
| 10            | 1             | 0           | -0.383028               | -1.484286 | 1.939181  |
| 11            | 1             | 0           | 1.686668                | -0.635974 | 3.008820  |
| 12            | 6             | 0           | -0.257785               | 1.701178  | -1.401027 |
| 13            | 6             | 0           | 0.480092                | 2.889574  | -1.939630 |
| 14            | 1             | 0           | 0.541401                | 3.683070  | -1.182837 |
| 15            | 1             | 0           | 1.516663                | 2.625902  | -2.188292 |
| 16            | 1             | 0           | 0.012402                | 3.302959  | -2.828929 |
| 17            | 46            | 0           | -1.867663               | 1.042795  | -2.375684 |
| 18            | 6             | 0           | -3.667917               | -0.043523 | -3.266886 |
| 19            | 1             | 0           | -3.286261               | -1.051196 | -3.401230 |
| 20            | 6             | 0           | -3.243714               | 0.924037  | -4.143609 |
| 21            | 1             | 0           | -3.724672               | 1.892376  | -4.213944 |
| 22            | 1             | 0           | -2.594284               | 0.657209  | -4.967927 |
| 23            | 6             | 0           | -4.765788               | 0.066781  | -2.287515 |
| 24            | 6             | 0           | -5.069804               | -1.073275 | -1.490486 |
| 25            | 6             | 0           | -5.528495               | 1.207170  | -2.116242 |
| 26            | 6             | 0           | -6.084195               | -1.053626 | -0.570930 |
| 27            | 1             | 0           | -4.479765               | -1.973462 | -1.621747 |
| 28            | 6             | 0           | -6.582289               | 1.262155  | -1.175924 |
| 29            | 1             | 0           | -5.330627               | 2.092217  | -2.709507 |
| 30            | 6             | 0           | -6.871694               | 0.109591  | -0.381112 |
| 31            | 1             | 0           | -6.297753               | -1.935049 | 0.023548  |
| 32            | 6             | 0           | -7.369378               | 2.430609  | -0.994874 |
| 33            | 1             | 0           | -7.151892               | 3.306020  | -1.596783 |
| 34            | 6             | 0           | -7.930604               | 0.168748  | 0.558559  |

|    |   |   |           |           |           |
|----|---|---|-----------|-----------|-----------|
| 35 | 1 | 0 | -8.147079 | -0.708078 | 1.158823  |
| 36 | 6 | 0 | -8.672098 | 1.314362  | 0.709344  |
| 37 | 1 | 0 | -9.479439 | 1.348699  | 1.431071  |
| 38 | 6 | 0 | -8.387774 | 2.456069  | -0.075890 |
| 39 | 1 | 0 | -8.980385 | 3.354065  | 0.052527  |

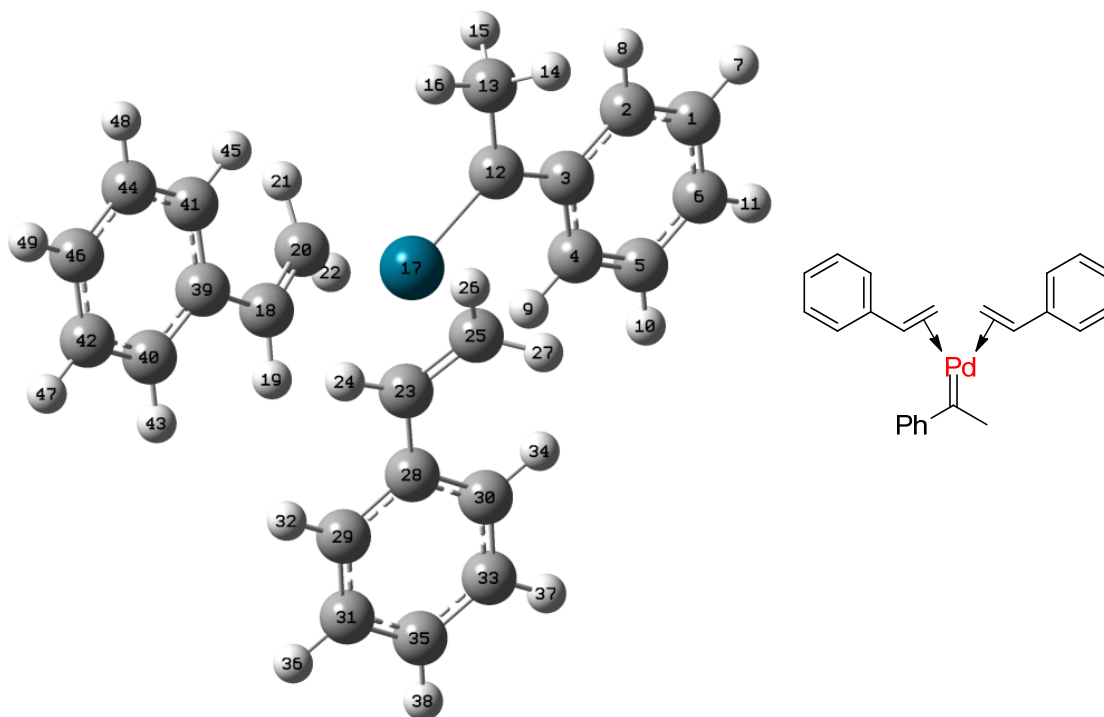

**Figure S26.** Optimized molecular geometry of **C** by DFT at B3LYP

**Table S17.** X, Y, Z-Coordinates of optimized intermediate **C**, calculated by DFT at B3LYP

| Center Number | Atomic Number | Atomic Type | Coordinates (Angstroms) |           |           |
|---------------|---------------|-------------|-------------------------|-----------|-----------|
|               |               |             | X                       | Y         | Z         |
| 1             | 6             | 0           | -5.712975               | -1.061454 | -0.120214 |
| 2             | 6             | 0           | -4.493433               | -1.592581 | 0.272183  |
| 3             | 6             | 0           | -3.284104               | -0.903776 | 0.032661  |
| 4             | 6             | 0           | -3.367796               | 0.342660  | -0.621940 |
| 5             | 6             | 0           | -4.584741               | 0.875504  | -1.015850 |
| 6             | 6             | 0           | -5.762852               | 0.173331  | -0.765308 |
| 7             | 1             | 0           | -6.628137               | -1.607421 | 0.075229  |
| 8             | 1             | 0           | -4.482235               | -2.551924 | 0.771568  |
| 9             | 1             | 0           | -2.445236               | 0.877555  | -0.813047 |
| 10            | 1             | 0           | -4.620677               | 1.834657  | -1.517989 |
| 11            | 1             | 0           | -6.716765               | 0.586218  | -1.071636 |
| 12            | 6             | 0           | -1.972607               | -1.417573 | 0.425642  |
| 13            | 6             | 0           | -1.970840               | -2.761291 | 1.092415  |
| 14            | 1             | 0           | -2.584065               | -2.749642 | 2.002935  |
| 15            | 1             | 0           | -2.415308               | -3.521684 | 0.437028  |
| 16            | 1             | 0           | -0.969803               | -3.088810 | 1.362618  |
| 17            | 46            | 0           | -0.226664               | -0.482979 | 0.180987  |
| 18            | 6             | 0           | 1.564525                | -0.513798 | -1.346420 |
| 19            | 1             | 0           | 1.763052                | 0.531980  | -1.552796 |



|    |   |   |           |           |           |
|----|---|---|-----------|-----------|-----------|
| 20 | 6 | 0 | 0.415519  | -1.074309 | -1.881643 |
| 21 | 1 | 0 | 0.306741  | -2.146823 | -1.980904 |
| 22 | 1 | 0 | -0.219357 | -0.479094 | -2.525725 |
| 23 | 6 | 0 | 1.057528  | 1.072211  | 1.399917  |
| 24 | 1 | 0 | 2.026528  | 0.596017  | 1.499605  |
| 25 | 6 | 0 | 0.004443  | 0.562667  | 2.143820  |
| 26 | 1 | 0 | 0.186352  | -0.246595 | 2.839979  |
| 27 | 1 | 0 | -0.887247 | 1.147102  | 2.331561  |
| 28 | 6 | 0 | 1.077587  | 2.391974  | 0.749123  |
| 29 | 6 | 0 | 2.304206  | 2.938514  | 0.339997  |
| 30 | 6 | 0 | -0.080494 | 3.159341  | 0.535938  |
| 31 | 6 | 0 | 2.374817  | 4.191950  | -0.258286 |
| 32 | 1 | 0 | 3.214548  | 2.373031  | 0.504058  |
| 33 | 6 | 0 | -0.010192 | 4.411060  | -0.061240 |
| 34 | 1 | 0 | -1.046678 | 2.770592  | 0.832457  |
| 35 | 6 | 0 | 1.217046  | 4.936875  | -0.464038 |
| 36 | 1 | 0 | 3.337239  | 4.588298  | -0.561047 |
| 37 | 1 | 0 | -0.919334 | 4.981011  | -0.215578 |
| 38 | 1 | 0 | 1.268136  | 5.913623  | -0.929945 |
| 39 | 6 | 0 | 2.708424  | -1.271385 | -0.813102 |
| 40 | 6 | 0 | 3.949552  | -0.632023 | -0.668890 |
| 41 | 6 | 0 | 2.630104  | -2.629292 | -0.459138 |
| 42 | 6 | 0 | 5.064129  | -1.313837 | -0.192193 |
| 43 | 1 | 0 | 4.040236  | 0.412381  | -0.945373 |
| 44 | 6 | 0 | 3.742903  | -3.310458 | 0.016022  |
| 45 | 1 | 0 | 1.687086  | -3.154725 | -0.545962 |
| 46 | 6 | 0 | 4.968106  | -2.658522 | 0.154169  |
| 47 | 1 | 0 | 6.009988  | -0.793434 | -0.094472 |
| 48 | 1 | 0 | 3.654382  | -4.357159 | 0.283954  |
| 49 | 1 | 0 | 5.833983  | -3.192831 | 0.526317  |

---

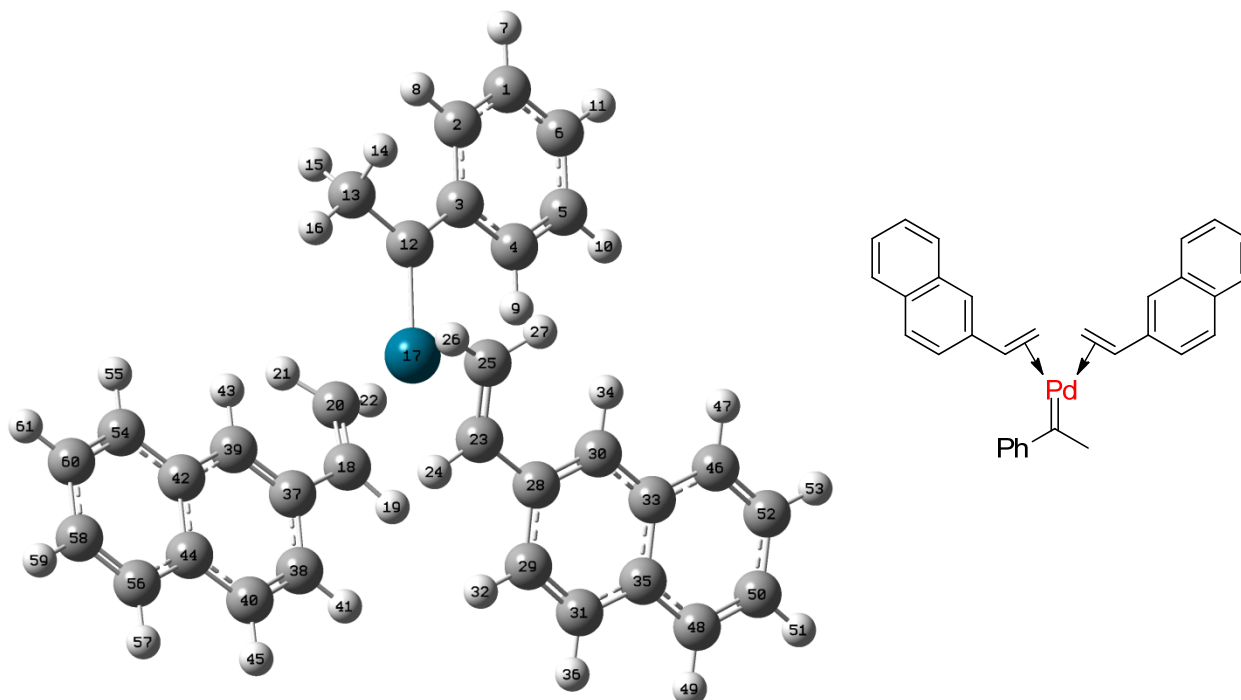

**Figure S27.** Optimized molecular geometry of **D** by DFT at B3LYP

**Table S18.** X, Y, Z-Cordinates of optimized intermediate **D**, calculated by DFT at B3LYP

| Center<br>Number | Atomic<br>Number | Atomic<br>Type | Coordinates (Angstroms) |           |           |
|------------------|------------------|----------------|-------------------------|-----------|-----------|
|                  |                  |                | X                       | Y         | Z         |
| 1                | 6                | 0              | 3.151963                | 5.458690  | -0.179347 |
| 2                | 6                | 0              | 1.920538                | 4.911323  | 0.147622  |
| 3                | 6                | 0              | 1.676806                | 3.526739  | 0.012753  |
| 4                | 6                | 0              | 2.734524                | 2.725928  | -0.465672 |
| 5                | 6                | 0              | 3.966881                | 3.269761  | -0.790267 |
| 6                | 6                | 0              | 4.178654                | 4.640421  | -0.648288 |
| 7                | 1                | 0              | 3.316216                | 6.523893  | -0.069462 |
| 8                | 1                | 0              | 1.140730                | 5.567458  | 0.509941  |
| 9                | 1                | 0              | 2.555696                | 1.662897  | -0.574347 |
| 10               | 1                | 0              | 4.763016                | 2.632220  | -1.155009 |
| 11               | 1                | 0              | 5.140179                | 5.070472  | -0.902736 |
| 12               | 6                | 0              | 0.397797                | 2.899401  | 0.338834  |
| 13               | 6                | 0              | -0.667975               | 3.815824  | 0.860747  |
| 14               | 1                | 0              | -0.327639               | 4.347705  | 1.758557  |
| 15               | 1                | 0              | -0.906257               | 4.591021  | 0.120653  |
| 16               | 1                | 0              | -1.586328               | 3.287611  | 1.105042  |
| 17               | 46               | 0              | -0.030679               | 0.959961  | 0.157011  |
| 18               | 6                | 0              | -1.117831               | -0.402830 | -1.429002 |
| 19               | 1                | 0              | -0.459988               | -1.255281 | -1.555343 |
| 20               | 6                | 0              | -0.717508               | 0.809845  | -1.968272 |
| 21               | 1                | 0              | -1.428688               | 1.604647  | -2.153813 |
| 22               | 1                | 0              | 0.200611                | 0.862060  | -2.539668 |
| 23               | 6                | 0              | 0.192908                | -0.964967 | 1.494528  |
| 24               | 1                | 0              | -0.807228               | -1.382040 | 1.528538  |
| 25               | 6                | 0              | 0.432793                | 0.201471  | 2.205736  |
| 26               | 1                | 0              | -0.354848               | 0.622495  | 2.818072  |
| 27               | 1                | 0              | 1.438507                | 0.504044  | 2.468232  |
| 28               | 6                | 0              | 1.225804                | -1.869576 | 0.967144  |
| 29               | 6                | 0              | 0.834413                | -3.169381 | 0.532978  |
| 30               | 6                | 0              | 2.568792                | -1.539977 | 0.891927  |
| 31               | 6                | 0              | 1.743935                | -4.072615 | 0.051387  |
| 32               | 1                | 0              | -0.211504               | -3.446262 | 0.598715  |
| 33               | 6                | 0              | 3.534417                | -2.447251 | 0.399146  |
| 34               | 1                | 0              | 2.908599                | -0.561218 | 1.209626  |
| 35               | 6                | 0              | 3.120725                | -3.745294 | -0.034720 |
| 36               | 1                | 0              | 1.417214                | -5.056358 | -0.267839 |
| 37               | 6                | 0              | -2.483224               | -0.728753 | -0.988367 |
| 38               | 6                | 0              | -2.830420               | -2.098305 | -0.803782 |
| 39               | 6                | 0              | -3.463750               | 0.223165  | -0.764616 |
| 40               | 6                | 0              | -4.088584               | -2.476661 | -0.417074 |
| 41               | 1                | 0              | -2.076458               | -2.855383 | -0.986464 |
| 42               | 6                | 0              | -4.771736               | -0.131698 | -0.363482 |
| 43               | 1                | 0              | -3.237476               | 1.276346  | -0.883927 |
| 44               | 6                | 0              | -5.100054               | -1.511542 | -0.182508 |
| 45               | 1                | 0              | -4.325483               | -3.527248 | -0.288684 |
| 46               | 6                | 0              | 4.912863                | -2.112170 | 0.318945  |
| 47               | 1                | 0              | 5.231591                | -1.128902 | 0.647300  |
| 48               | 6                | 0              | 4.091874                | -4.651033 | -0.528075 |
| 49               | 1                | 0              | 3.771375                | -5.634203 | -0.855318 |
| 50               | 6                | 0              | 5.416917                | -4.295355 | -0.592423 |
| 51               | 1                | 0              | 6.151253                | -4.995997 | -0.971585 |

|    |   |   |           |           |           |
|----|---|---|-----------|-----------|-----------|
| 52 | 6 | 0 | 5.829639  | -3.012258 | -0.163613 |
| 53 | 1 | 0 | 6.877668  | -2.741969 | -0.218341 |
| 54 | 6 | 0 | -5.779406 | 0.842341  | -0.129341 |
| 55 | 1 | 0 | -5.534820 | 1.890199  | -0.265049 |
| 56 | 6 | 0 | -6.412011 | -1.862364 | 0.221046  |
| 57 | 1 | 0 | -6.654682 | -2.910843 | 0.356137  |
| 58 | 6 | 0 | -7.362964 | -0.895672 | 0.438692  |
| 59 | 1 | 0 | -8.363237 | -1.175215 | 0.747286  |
| 60 | 6 | 0 | -7.041352 | 0.470266  | 0.260943  |
| 61 | 1 | 0 | -7.799347 | 1.224832  | 0.435505  |

---

## 12. References:

- (1) Denton, R. M.; An, J.; Adeniran, B.; Blake, A. J.; Lewis, W.; Poulton, A. M. *J. Org. Chem.* **2011**, *76*, 6749.
- (2) Bull, S. D.; Davies, S. G.; Epstein, S. W.; Garner, A. C.; Mujtaba, N.; Roberts, P. M.; Savory, E. D.; Smith, A. D.; Tamayo, J. A.; Watkin, D. J. *Tetrahedron* **2006**, *62*, 7911.
- (3) Hajipour, A. R.; Zarei, A.; Ruoho, A. E. *Synthetic Communications* **2006**, *36*, 1039.
- (4) Wyatt, P.; Eley, H.; Charmant, J.; Daniel, B. J.; Kantacha, A. *Eur. J. Org. Chem.* **2003**, *2003*, 4216.
- (5) Soni, R.; Jolley, K. E.; Clarkson, G. J.; Wills, M. *Org. Lett.* **2013**, *15*, 5110.
- (6) Schabel, T.; Belger, C.; Plietker, B. *Org. Lett.* **2013**, *15*, 2858.
- (7) Ilies, L.; Yoshida, T.; Nakamura, E. *J. Am. Chem. Soc.* **2012**, *134*, 16951.
- (8) Söderman, S. C.; Schwan, A. L. *J. Org. Chem.* **2012**, *77*, 10978.
- (9) Moncomble, A.; Floch, P. L.; Lledos, A.; Gosmini, C. *J. Org. Chem.* **2012**, *77*, 5056.
- (10) Mochida, S.; Hirano, K.; Satoh, T.; Miura, M. *J. Org. Chem.* **2011**, *76*, 3024.
- (11) Sheldrick, G. M. *Acta Cryst.* **2008**, *A64*, 112.
- (12) Farrugia, L. J. *J. Appl. Cryst.* **1999**, *32*, 837.
- (13) (a) Hohenberg, P.; Kohn, W. *Phys. Rev.* **1964**, *136*, 864. (b) Kohn, W.; Sham, L. *J. Phys. Rev.* **1965**, *140*, 1133.
- (14) Gaussian 09, Revision C.01, Frisch, M. J.; Trucks, G. W.; Schlegel, H. B.; Scuseria, G. E.; Robb, M. A.; Cheeseman, J. R.; Scalmani, G.; Barone, V.; Mennucci, B.; Petersson, G. A.; Nakatsuji, H.; Caricato, M.; Li, X.; Hratchian, H. P.; Izmaylov, A. F.; Bloino, J.;

Zheng, G.; Sonnenberg, J. L.; Hada, M.; Ehara, M.; Toyota, K.; Fukuda, R.; Hasegawa, J.; Ishida, M.; Nakajima, T.; Honda, Y.; Kitao, O.; Nakai, H.; Vreven, T.; Montgomery, J. A., Jr.; Peralta, J. E.; Ogliaro, F.; Bearpark, M.; Heyd, J. J.; Brothers, E.; Kudin, K. N.; Staroverov, V. N.; Kobayashi, R.; Normand, J.; Raghavachari, K.; Rendell, A.; Burant, J. C.; Iyengar, S. S.; Tomasi, J.; Cossi, M.; Rega, N.; Millam, M. J.; Klene, M.; Knox, J. E.; Cross, J. B.; Bakken, V.; Adamo, C.; Jaramillo, J.; Gomperts, R.; Stratmann, R. E.; Yazyev, O.; Austin, A. J.; Cammi, R.; Pomelli, C.; Ochterski, J. W.; Martin, R. L.; Morokuma, K.; Zakrzewski, V. G.; Voth, G. A.; Salvador, P.; Dannenberg, J. J.; Dapprich, S.; Daniels, A. D.; Farkas, Ö.; Foresman, J. B.; Ortiz, J. V.; Cioslowski, J.; Fox, D. J., Gaussian, Inc., Wallingford CT, 2010.

(15) (a) Becke, A. D. *J. Chem. Phys.* **1993**, *98*, 5648. (b) Lee, C.; Yang, W.; Parr, R. G. *Phys. Rev.* **1988**, *37*, 785.

(16) Hay, P. J.; Wadt, W. R. *J. Chem. Phys.* **1985**, *82*, 270.

(17) Tomasi, J.; Mennucci, B.; Cammi, R. *Chem. Rev.* **2005**, *105*, 2999.
